# Supplementary material for: Brown adipose tissue and skeletal muscle coordinately contribute to thermogenesis in mice
Source: eLife. 2025 Oct 27;13:RP99982. doi: 10.7554/eLife.99982 (PMC12558653; doi:10.7554/eLife.99982)
Supplement: Figure 1—source data 1. [file elife-99982-fig1-data1.xlsx]

## Sheet: Fig.1A
(A) Time course of rectal core body temperature of cast-immobilized (gypsum, n = 6) and control (n = 5) mice subjected to a cold (4°C) challenge test. The test was performed 7 days after bilateral immobilization of hind limbs.
Rectal temperature (℃)	0 min	15 min	30 min	60 min
Control 1	37.4	36.8	37	36.2
Control 2	37.2	37	36.3	36.5
Control 3	37.2	37.2	36.9	36.5
Control 4	37.6	37.4	37.6	36.4
Control 5	37.6	37	36.5	36
Imm (day 7) 1	37.4	36.5	36.1	36.2
Imm (day 7) 2	38	36.5	36.4	35.7
Imm (day 7) 3	37.5	35.5	35.6	35.4
Imm (day 7) 4	37.8	36.4	36.7	35.9
Imm (day 7) 5	36.9	36.5	36	35
Imm (day 7) 6	36.5	36	35.7	35.2

## Sheet: Fig.1B
(B) Rectal core body temperature of cast-immobilized (n = 5) and control (n = 5) mice during cold (4°C) exposure at 24 h after bilateral cast immobilization.
Rectal temperature (℃)	0 h	4 h
Control 1	37.4	35
Control 2	37.2	35.6
Control 3	37.2	37
Control 4	37.6	35.7
Control 5	37.6	36.2
Imm (24 h) 1	37.6	34.9
Imm (24 h) 2	37.1	34.3
Imm (24 h) 3	37.8	34.5
Imm (24 h) 4	37.4	35.5
Imm (24 h) 5	36.9	35.4

## Sheet: Fig.1C
(C) Decline in rectal temperature of cast-immobilized and control (n = 9) mice after cold (4°C) exposure for 4 h performed 2 h after unilateral (UL, n =8) or bilateral (BL, n = 9) immobilization.
Rectal temperature (℃)	pre	post (4h)	post-pre
Control 1	36.3	36.2	-0.1
Control 2	37.6	35.6	-2
Control 3	35.9	35.5	-0.4
Control 4	36.5	35.8	-0.7
Control 5	36.4	34.8	-1.6
Control 6	37.4	34.8	-2.6
Control 7	37.3	35.8	-1.5
Control 8	37.7	35.8	-1.9
Control 9	37.1	35.6	-1.5
Unilateral 1	37.7	35.7	-2
Unilateral 2	37.9	35	-2.9
Unilateral 3	37.3	34.5	-2.8
Unilateral 4	36.8	34.7	-2.1
Unilateral 5	37.4	35.3	-2.1
Unilateral 6	37.4	36.1	-1.3
Unilateral 7	37.4	33.5	-3.9
Unilateral 8	37	36.4	-0.6
Bilateral 1	37.1	35.5	-1.6
Bilateral 2	37.1	34	-3.1
Bilateral 3	37.3	35.5	-1.8
Bilateral 4	37.5	34.2	-3.3
Bilateral 5	36.9	33.2	-3.7
Bilateral 6	37.8	33.4	-4.4
Bilateral 7	37.3	35.3	-2
Bilateral 8	37	35	-2
Bilateral 9	37.3	34.4	-2.9

## Sheet: Fig.1D
(D) Reverse transcription (RT) and real-time polymerase chain reaction (PCR) analysis of the Ucp1/Gapdh mRNA abundance ratio in iBAT of control mice and mice subjected to bilateral cast immobilization for the indicated times (n = 7 to 13 per group).
	GAPDH	UCP1	UCP1/GAPDH
Control 1	0.19773	0.124875	0.631545
Control 2	0.785715	0.17485	0.222537
Control 3	0.212597	0.199147	0.936731
Control 4	0.440554	0.618341	1.40355
Control 5	0.280866	0.170318	0.606401
Control 6	0.634847	0.22456	0.353723
Control 7	0.487876	0.546724	1.12062
Control 8	0.655208	0.42035	0.641551
Control 9	0.33366	0.289781	0.868494
Imm (10 h) 1	0.330298	0.26183	0.792707
Imm (10 h) 2	0.367421	0.469871	1.27884
Imm (10 h) 3	0.354546	0.288164	0.812771
Imm (10 h) 4	0.257258	0.1106	0.42992
Imm (10 h) 5	0.366258	0.175389	0.478867
Imm (10 h) 6	0.271277	0.205828	0.758738
Imm (24 h) 1	0.422701	0.546022	1.29175
Imm (24 h) 2	0.265282	0.382847	1.44317
Imm (24 h) 3	0.465685	0.451041	0.968555
Imm (24 h) 4	0.229763	0.468086	2.03726
Imm (24 h) 5	0.414387	0.543618	1.31186
Imm (24 h) 6	0.270824	0.156214	0.57681
Imm (day 3) 1	0.345657	0.361042	1.04451
Imm (day 3) 2	0.535394	0.263293	0.491773
Imm (day 3) 3	0.327061	0.217497	0.665005
Imm (day 3) 4	0.463695	0.0988961	0.213278
Imm (day 3) 5	0.335634	0.200012	0.595921
Imm (day 3) 6	0.414173	0.0974295	0.235238
Imm (day 5 ) 1	0.67022	0.477337	0.712209
Imm (day 5 ) 2	0.546253	0.113939	0.208584
Imm (day 5 ) 3	0.47445	0.210536	0.443747
Imm (day 5 ) 4	0.367195	0.0966591	0.263237
Imm (day 5 ) 5	0.486572	0.19133	0.393219
Imm (day 5 ) 6	0.584898	0.405979	0.694102
Imm (day 7) 1	0.637207	0.130404	0.204649
Imm (day 7) 2	0.474437	0.218386	0.460306
Imm (day 7) 3	0.408755	0.110534	0.270417

## Sheet: Fig.1F-G
(E–G) Immunoblot analysis of PGC-1a (n = 3 or 4 per group) and UCP1 (n = 6 per group) in iBAT of control mice and mice subjected to bilateral cast immobilization for the indicated times. GAPDH was examined as a loading control. Representative blots (E) and densitometric quantitation of the PGC-1a/GAPDH (F) and UCP1/GAPDH (G) band intensity ratios are shown.
Band intensity	GAPDH	UCP1	UCP1/GAPDH
Control 1	62050.2	98280.2	1.58388
Control 2	143321	152341	1.06294
Control 3	84713.5	38999	0.460363
Control 4	57196.9	62642.2	1.0952
Control 5	135639	212158	1.56414
Control 6	145054	171705	1.18373
Imm (10 h) 1	151150	159542	1.05552
Imm (10 h) 2	119081	426487	3.5815
Imm (10 h) 3	106711	76357.9	0.715555
Imm (10 h) 4	96065	307664	3.20267
Imm (10 h) 5	73009.8	77964.6	1.06786
Imm (10 h) 6	84737.2	184057	2.17209
Imm (24 h) 1	79267.1	110488	1.39387
Imm (24 h) 2	78556.2	125948	1.60328
Imm (24 h) 3	105689	271162	2.56566
Imm (24 h) 4	106593	188101	1.76466
Imm (24 h) 5	68074.8	395821	5.8145
Imm (24 h) 6	78052.1	49962.3	0.640115
Imm (day 3) 1	137693	261046	1.89585
Imm (day 3) 2	108652	153496	1.41273
Imm (day 3) 3	144287	108830	0.754257
Imm (day 3) 4	126804	221086	1.74353
Imm (day 3) 5	113434	19387.2	0.170911
Imm (day 3) 6	139076	198491	1.42721
Imm (day 5) 1	165717	318754	1.92348
Imm (day 5) 2	189225	215722	1.14003
Imm (day 5) 3	115008	216847	1.88549
Imm (day 5) 4	77679	156991	2.02102
Imm (day 5) 5	127537	23672.2	0.18561
Imm (day 5) 6	111248	52099.9	0.46832
Imm (day 7) 1	198714	42793.9	0.215354
Imm (day 7) 2	183687	59633.2	0.324646
Imm (day 7) 3	133294	60395.8	0.453103
Imm (day 7) 4	89487.1	33961.8	0.379516
Imm (day 7) 5	124632	3169.68	0.0254324
Imm (day 7) 6	150924	3051.95	0.0202217
Band intensity	GAPDH	PGC-1a	PGC-1a/GAPDH
Control 1	-	-	-
Control 2	118904	148428	1.2483
Control 3	135639	93170.3	0.686898
Control 4	145054	36736.7	0.253261
Imm (10 h) 1	159907	146783	0.91793
Imm (10 h) 2	114071	143496	1.25796
Imm (10 h) 3	73009.8	144950	1.98536
Imm (10 h) 4	84737.2	152061	1.7945
Imm (24 h) 1	56722.4	110906	1.95524
Imm (24 h) 2	83326.8	114394	1.37283
Imm (24 h) 3	68074.8	165339	2.42878
Imm (24 h) 4	78052.1	124095	1.58989
Imm (day 3) 1	177683	132822	0.747519
Imm (day 3) 2	139018	110114	0.792088
Imm (day 3) 3	113434	104758	0.923516
Imm (day 3) 4	139076	115918	0.833483
Imm (day 5) 1	202466	101186	0.49977
Imm (day 5) 2	209335	123555	0.590228
Imm (day 5) 3	127537	120974	0.948534
Imm (day 5) 4	111248	103119	0.926923
Imm (day 7) 1	158305	112310	0.709451
Imm (day 7) 2	162969	208295	1.27813
Imm (day 7) 3	124632	100798	0.808768
Imm (day 7) 4	150924	44614.1	0.295606

## Sheet: Fig.1H
(H) Noradrenaline concentrations in iBAT of cast-immobilized (n = 4) and control (n = 4) mice after subsequent biteral cast immobilization.
	Noradrenaline (nmol/g)
Control 1	45.8965
Control 2	108.001
Control 3	55.7023
Control 4	81.9624
Imm (10 h) 1	92.4994
Imm (10 h) 2	61.8696
Imm (10 h) 3	196.423
Imm (10 h) 4	62.008
Imm (24 h) 1	280.396
Imm (24 h) 2	174.22
Imm (24 h) 3	161.905
Imm (24 h) 4	61.4719
Imm (day 3) 1	43.1031
Imm (day 3) 2	56.3335
Imm (day 3) 3	129.311
Imm (day 3) 4	92.8639
Imm (day 5) 1	58.7354
Imm (day 5) 2	63.3341
Imm (day 5) 3	73.672
Imm (day 5) 4	242.358
Imm (day 7) 1	51.55
Imm (day 7) 2	56.1869
Imm (day 7) 3	45.9165
Imm (day 7) 4	138.8

## Sheet: Fig.1I
(I) RT and real-time PCR analysis of the Ucp1/Gapdh mRNA abundance ratio in iBAT subjected to surgical denervation or sham surgery, either in control mice or in mice at 24 h after subsequent bilateral cast immobilization (n = 6–9 per group).
		Gapdh	Ucp1	Ucp1/Gapdh
Sham	Control 1	0.19773	0.124875	0.631545
	Control 2	0.785715	0.17485	0.222537
	Control 3	0.212597	0.199147	0.936731
	Control 4	0.440554	0.618341	1.40355
	Control 5	0.280866	0.170318	0.606401
	Control 6	0.634847	0.22456	0.353723
	Control 7	0.487876	0.546724	1.12062
	Control 8	0.655208	0.42035	0.641551
	Control 9	0.33366	0.289781	0.868494
	Imm (24 h) 1	0.422701	0.546022	1.29175
	Imm (24 h) 2	0.265282	0.382847	1.44317
	Imm (24 h) 3	0.465685	0.451041	0.968555
	Imm (24 h) 4	0.229763	0.468086	2.03726
	Imm (24 h) 5	0.414387	0.543618	1.31186
	Imm (24 h) 6	0.270824	0.156214	0.57681
Denervation	Control 1	0.293351	0.00334982	0.0114192
	Control 2	0.772786	0.0144059	0.0186415
	Control 3	0.439352	0.00931172	0.0211942
	Control 4	0.777004	0.00292849	0.00376895
	Control 5	0.740231	0.0136586	0.0184518
	Control 6	0.726466	0.00138058	0.0019004
	Imm (24 h) 1	0.82739	0.00330602	0.00399572
	Imm (24 h) 2	0.958333	0.0051786	0.00540376
	Imm (24 h) 3	0.754443	0.00584681	0.00774983
	Imm (24 h) 4	0.941646	0.00574974	0.00610605
	Imm (24 h) 5	1.21968	0.00512196	0.00419944
	Imm (24 h) 6	0.298308	0.0717177	0.240415

## Sheet: Fig.1J
(J) Rectal core body temperature of mice as in (I) subjected to cold (4°C) exposure for 1 h (n = 3 or 4 per group).
		0 min	60 min
Sham	Control 1	37.7	36.8
	Control 2	37.8	36.9
	Control 3	36.9	37.1
	Imm (24 h) 1	37.7	36.4
	Imm (24 h) 2	37.4	35.4
	Imm (24 h) 3	36.9	36
	Imm (24 h) 4	36.9	35.6
Denervated	Control 1	37.3	36.2
	Control 2	37.1	36.2
	Control 3	37.4	35.6
	Imm (24 h) 1	37.3	35.3
	Imm (24 h) 2	37.3	35
	Imm (24 h) 3	37	34.7

## Sheet: S1A-C
(A–C) Weight of individual soleus (A), gastrocnemius (B), and extensor digitorum longus (EDL) muscles of control mice and mice subjected to bilateral cast immobilization of hind limbs for the indicated times (n = 5-7 per group).
	Tissue weight (mg)			Body weight
	Gastrocnemius	Soleus	EDL	g
Control 1	299	21.6	32.9	24.5
Control 2	285.5	23	27.5	24
Control 3	297.1	20.2	24.8	24.6
Control 4	349.2	23.8	27.5	28.69
Control 5	338.8	24.4	26.8	27.38
Control 6	314.6	23.7	28	26.84
Imm (10 h) 1	319	19.3	24.6	26.1
Imm (10 h) 2	273.1	13.8	21.6	25.3
Imm (10 h) 3	298.8	18.5	24.8	26.3
Imm (10 h) 4	353.2	21.3	26.6	30.2
Imm (10 h) 5	293.9	17.6	28.1	26.21
Imm (10 h) 6	306.5	19.6	26.1	27.25
Imm (24 h) 1	308.2	20.9	24.9	24.02
Imm (24 h) 2	248.3	21.9	26.5	24.33
Imm (24 h) 3	290.6	20.5	26.6	24.46
Imm (24 h) 4	298.4	21.6	25.5	23.56
Imm (24 h) 5	299.1	22.8	26.1	25.55
Imm (24 h) 6	283.1	20.1	23.3	24.67
Imm (day 3) 1	300.9	17.4	31.1	26.31
Imm (day 3) 2	291.3	18.4	29.5	26.13
Imm (day 3) 3	271.7	18.2	26.9	25.81
Imm (day 3) 4	268.4	20.5	27.8	24.1
Imm (day 3) 5	288.4	19.9	25.2	25.27
Imm (day 5) 1	284.1	15.1	26.4	26.9
Imm (day 5) 2	255.5	15.6	24.8	25.24
Imm (day 5) 3	274.5	16.1	24.4	25.65
Imm (day 5) 4	274.3	17.9	23.3	25.56
Imm (day 5) 5	279.2	15.7	25.1	27.57
Imm (day 5) 6	231.1	14.8	26.1	23.35
Imm (day 7) 1	236.5	17.1	37.9	21
Imm (day 7) 2	274.1	19.1	22.1	22.2
Imm (day 7) 3	232.6	20.3	26.7	21.5
Imm (day 7) 4	250	11	20	26.26
Imm (day 7) 5	278	13	22	25.71
Imm (day 7) 6	257.2	16.7	24.4	24.92
Imm (day 7) 7	267.9	18.7	24.1	26.39

## Sheet: S1D-E
(D and E) Locomotor activity during light (D) and dark (E) phases for control mice and mice subjected to bilateral cast immobilization for the indicated times (n = 6 per group).
Counts /h																Average (counts/h)
			Control 1	Control 2	Control 3	Control 4	Control 5	Control 6	Gypsum 1	Gypsum 2	Gypsum 3	Gypsum 4	Gypsum 5	Gypsum 6				Control 1	Control 2	Control 3	Control 4	Control 5	Control 6	Imm 1	Imm 2	Imm 3	Imm 4	Imm 5	Imm 6
Day 1	Light	10:00:00	-	-	-	3	164	0	-	-	-	209	348	218		Day 1	Light	2	23.2222	18.4444	63.8	24	23.3	36.2222	24.8889	16.6667	56.5	47.4	57.1
		11:00:00	6	61	80	502	38	0	127	143	56	82	61	213			Dark	20.6154	28	117.462	64.1818	43.4545	85.4545	29.9231	33.8462	22.0769	47.6364	11.7273	26.7273
		12:00:00	1	31	12	102	0	133	95	26	44	111	21	85		Day 2	Light	1.90909	6.72727	10.2727	9.72727	11.9091	3.72727	2.63636	8.72727	5.54545	13	6.18182	8.72727
		13:00:00	0	9	15	7	9	74	30	7	4	61	10	0			Dark	37.8462	27.9231	104.462	63.8333	49.75	86.6667	54.3077	29.4615	23.1538	29.25	10.5	22.5833
		14:00:00	0	36	7	8	0	16	0	14	15	21	3	0		Day 3	Light	0.727273	8.36364	14.4545	16.6	6.2	7.2	3.54545	5.54545	1.54545	4.3	0.5	6.7
		15:00:00	0	0	26	0	0	0	16	7	0	24	12	38			Dark	35	24.0769	91.9231	115.833	54.5833	92.0833	49.7692	26.9231	34.5385	23.25	8.16667	21.0833
		16:00:00	1	31	3	0	4	10	20	0	11	16	0	0		Day 4	Light	2.18182	5.54545	18.5455	9.8	6.8	8.1	28.3636	5.18182	6.72727	5	20.5	11.1
		17:00:00	1	6	15	0	7	0	0	0	4	0	1	0			Dark	62.4615	20.6154	91.7692	61.9167	51.75	67	54.9231	27.4615	19.0769	40.3333	15.25	18.25
		18:00:00	2	31	7	16	9	0	38	21	9	26	0	0		Day 5	Light	4.7	12.5	25.4	10.5	9.1	9.8	21.1	11.4	24.8	9.1	3.7	43.9
		19:00:00	7	4	1	0	9	0	0	6	7	15	18	17			Dark	27.7692	13.7692	78.3846	72.75	68.6667	69.8333	26.5385	23.8462	19.5385	17.6667	11.4167	72.6667
	Dark	20:00:00	7	35	184	56	19	92	59	57	66	91	1	0		Day 6	Light	1	3.27273	12.5455	18.2	8.1	4.3	8.09091	3.09091	6.09091	10	24.4	22.6
		21:00:00	49	51	312	-	-	-	155	50	39	-	-	-			Dark	32.3846	19.0769	72.3077	86.1667	82.1667	95.9167	43.4615	35.4615	28.9231	21.1667	12.4167	44
		22:00:00	31	45	55	103	53	170	13	11	7	58	20	38		Day 7	Light	4.81818	3.81818	13.4545	7.1	18.6	4.7	8.27273	7.72727	7.36364	8.7	2.9	29.5
		23:00:00	0	8	179	103	160	159	21	54	8	14	0	32			Dark	32.6923	23.6154	103.077	112.333	98.4167	63.0833	70.9231	40.4615	33.4615	11.1667	11.75	52.5
		00:00:00	13	96	181	134	49	51	26	26	26	109	25	46
		01:00:00	26	1	15	21	42	120	10	74	38	48	0	63
		02:00:00	5	70	167	26	20	43	0	4	19	51	10	29
		03:00:00	4	0	39	121	8	6	53	3	16	32	9	10
		04:00:00	38	14	20	7	100	22	0	54	3	0	16	3
		05:00:00	1	4	118	9	0	74	3	1	23	6	4	47
		06:00:00	35	5	186	94	26	197	22	56	33	115	23	19
		07:00:00	34	18	70	32	1	6	0	20	8	0	21	7
		08:00:00	25	17	1	-	-	-	27	30	1	-	-	-
Day 2	Light	09:00:00	1	3	14	0	28	3	0	0	8	20	17	34
		10:00:00	1	0	6	0	1	3	0	0	7	0	0	5
		11:00:00	1	10	0	0	13	2	3	12	21	1	0	13
		12:00:00	0	1	31	0	6	1	7	19	0	0	29	0
		13:00:00	14	0	31	0	31	0	0	28	1	10	0	15
		14:00:00	0	8	0	41	1	0	0	3	3	55	1	0
		15:00:00	1	0	11	0	0	0	0	0	0	0	5	8
		16:00:00	1	13	4	0	0	11	8	0	11	48	7	7
		17:00:00	2	3	10	0	19	1	0	34	3	0	0	1
		18:00:00	0	3	2	7	0	2	11	0	2	0	0	13
		19:00:00	0	33	4	59	32	18	0	0	5	9	9	0
	Dark	20:00:00	25	35	205	-	-	-	108	20	29	-	-	-
		21:00:00	59	53	68	126	41	132	209	88	31	36	15	30
		22:00:00	14	14	134	236	47	124	52	11	38	3	12	74
		23:00:00	20	34	29	152	68	244	39	103	45	66	31	64
		00:00:00	43	106	286	32	45	308	0	45	13	39	4	3
		01:00:00	0	24	59	24	57	82	171	4	10	3	13	35
		02:00:00	26	21	267	26	165	3	3	39	29	74	0	2
		03:00:00	27	17	23	37	30	23	3	32	0	16	13	0
		04:00:00	44	27	44	22	49	35	58	1	10	3	4	1
		05:00:00	50	3	108	39	54	21	9	14	15	11	19	22
		06:00:00	93	26	96	35	38	10	1	11	35	46	1	18
		07:00:00	47	0	24	20	0	13	31	1	28	30	0	20
		08:00:00	44	3	15	17	3	45	22	14	18	24	14	2
Day 3	Light	09:00:00	1	5	5	-	-	-	0	0	5	-	-	-
		10:00:00	0	4	74	27	8	0	0	0	3	5	1	0
		11:00:00	2	2	9	0	0	9	0	31	0	1	2	33
		12:00:00	3	4	0	52	1	35	26	0	1	11	0	0
		13:00:00	0	12	7	0	0	3	2	1	0	0	1	27
		14:00:00	0	5	12	6	42	0	0	0	5	1	0	0
		15:00:00	0	17	31	0	0	5	0	13	0	12	0	0
		16:00:00	0	3	0	3	0	0	8	12	0	0	1	2
		17:00:00	0	12	6	35	1	0	3	2	0	9	0	0
		18:00:00	1	12	5	35	10	20	0	2	2	0	0	0
		19:00:00	1	16	10	8	0	0	0	0	1	4	0	5
	Dark	20:00:00	32	86	240	-	-	-	66	46	49	-	-	-
		21:00:00	59	28	100	279	54	94	199	47	28	34	3	27
		22:00:00	20	46	128	242	85	31	23	7	81	14	15	76
		23:00:00	77	5	22	48	153	43	3	19	43	17	14	45
		00:00:00	3	22	143	25	73	259	134	8	19	49	12	1
		01:00:00	51	41	22	31	28	289	22	71	80	33	0	11
		02:00:00	18	1	81	236	22	13	4	32	0	10	10	4
		03:00:00	10	30	111	157	30	21	76	2	52	16	10	11
		04:00:00	20	11	33	5	79	0	24	1	30	23	1	8
		05:00:00	37	7	46	0	91	289	20	38	9	5	2	36
		06:00:00	101	26	153	129	23	4	61	31	50	34	12	7
		07:00:00	9	8	23	98	0	0	1	47	0	19	19	3
		08:00:00	18	2	93	140	17	62	14	1	8	25	0	24
Day 4	Light	09:00:00	0	6	0	-	-	-	0	6	0	-	-	-
		10:00:00	0	1	13	0	0	34	11	3	1	0	3	10
		11:00:00	10	4	38	0	4	1	0	1	1	9	139	8
		12:00:00	2	27	60	43	0	3	1	4	24	0	24	1
		13:00:00	1	0	34	12	4	26	63	9	1	6	19	53
		14:00:00	5	3	1	0	0	0	0	2	6	0	3	3
		15:00:00	0	3	3	2	23	0	0	0	0	16	1	2
		16:00:00	2	0	43	0	27	0	4	2	5	0	12	2
		17:00:00	2	2	0	16	0	16	214	25	23	3	1	20
		18:00:00	2	6	5	1	2	0	2	4	11	7	2	9
		19:00:00	0	9	7	24	8	1	17	1	2	9	1	3
	Dark	20:00:00	165	59	168	-	-	-	36	80	27	-	-	-
		21:00:00	81	56	150	145	45	102	272	41	17	4	13	16
		22:00:00	9	25	80	166	96	163	54	19	6	1	21	69
		23:00:00	26	35	164	63	213	71	115	28	30	282	26	13
		00:00:00	9	12	159	21	96	34	19	69	35	49	38	37
		01:00:00	135	8	20	72	10	142	105	38	19	21	2	6
		02:00:00	56	19	87	19	34	195	43	12	35	8	5	12
		03:00:00	24	19	35	7	13	13	2	1	3	19	8	9
		04:00:00	60	0	42	9	38	27	2	14	14	15	9	13
		05:00:00	118	10	87	11	57	15	12	6	32	19	14	5
		06:00:00	75	8	166	122	7	15	54	31	17	7	24	6
		07:00:00	43	11	34	98	11	10	0	7	1	40	15	11
		08:00:00	11	6	1	10	1	17	0	11	12	19	8	22
Day 5	Light	09:00:00	7	17	17	-	-	-	7	12	1	-	-	-
		10:00:00	0	0	4	19	30	2	0	0	20	13	17	1
		11:00:00	-	-	-	2	0	35	-	-	-	0	8	87
		12:00:00	9	5	51	1	21	0	82	55	102	6	0	200
		13:00:00	0	4	4	20	0	0	10	5	24	21	1	19
		14:00:00	0	18	77	0	0	37	4	3	11	12	3	23
		15:00:00	2	2	2	0	7	0	27	0	1	0	1	4
		16:00:00	0	8	14	12	1	15	7	9	56	8	0	0
		17:00:00	0	21	2	0	7	9	1	0	3	14	0	38
		18:00:00	28	46	75	0	1	0	56	26	18	1	7	67
		19:00:00	1	4	8	51	24	0	17	4	12	16	0	0
	Dark	20:00:00	6	19	33	-	-	-	79	6	31	-	-	-
		21:00:00	14	24	123	140	163	54	48	16	26	15	17	31
		22:00:00	4	14	17	110	147	183	30	20	24	28	8	152
		23:00:00	74	29	147	241	190	93	7	15	32	8	29	36
		00:00:00	25	37	50	16	139	124	20	24	49	21	21	115
		01:00:00	30	1	183	50	15	149	36	31	1	32	7	12
		02:00:00	72	14	6	43	17	41	4	88	27	18	13	75
		03:00:00	3	7	29	83	23	39	27	3	1	18	4	50
		04:00:00	21	2	43	9	36	38	20	1	3	14	4	53
		05:00:00	39	15	112	58	34	81	18	13	41	12	5	75
		06:00:00	9	0	18	109	34	16	10	62	10	15	7	93
		07:00:00	41	16	179	13	7	7	10	15	9	10	22	76
		08:00:00	23	1	79	1	19	13	36	16	0	21	0	104
Day 6	Light	09:00:00	0	19	11	-	-	-	0	1	7	-	-	-
		10:00:00	0	0	24	5	27	10	2	2	6	3	2	103
		11:00:00	0	2	4	20	0	0	14	8	3	6	133	9
		12:00:00	6	0	0	69	17	7	32	7	5	1	81	25
		13:00:00	0	0	25	27	0	22	0	1	5	26	7	12
		14:00:00	2	3	0	16	0	0	4	5	19	15	2	4
		15:00:00	0	0	4	4	0	0	7	1	2	17	3	31
		16:00:00	0	0	56	10	5	0	14	4	6	1	7	27
		17:00:00	0	7	0	2	28	0	0	0	0	16	9	4
		18:00:00	0	0	8	4	1	4	4	5	1	0	0	0
		19:00:00	3	5	6	25	3	0	12	0	13	15	0	11
	Dark	20:00:00	45	59	63	-	-	-	113	11	23	-	-	-
		21:00:00	34	40	189	183	75	58	36	22	66	17	8	15
		22:00:00	67	3	124	213	133	32	65	18	42	25	6	22
		23:00:00	86	9	86	19	301	158	22	19	52	29	2	80
		00:00:00	38	27	68	1	195	215	99	123	17	27	47	14
		01:00:00	5	6	52	34	0	24	9	21	32	20	11	73
		02:00:00	62	22	165	26	17	19	30	21	20	19	1	52
		03:00:00	4	29	12	122	99	27	8	65	5	14	8	23
		04:00:00	6	2	10	8	5	27	64	17	14	21	5	74
		05:00:00	51	18	26	34	45	245	9	71	26	38	31	54
		06:00:00	22	30	136	203	116	276	63	32	21	6	21	27
		07:00:00	0	0	0	33	0	37	29	34	13	23	1	37
		08:00:00	1	3	9	158	0	33	18	7	45	15	8	57
Day 7	Light	09:00:00	2	0	9	7	6	0	0	1	0	21	1	24
		10:00:00	0	14	17	-	-	-	0	1	0	-	-	-
		11:00:00	4	0	0	0	1	11	4	23	3	11	4	18
		12:00:00	11	5	74	17	0	1	9	1	0	1	0	49
		13:00:00	2	0	0	0	121	0	9	6	24	0	2	48
		14:00:00	29	5	7	0	0	28	5	1	4	41	0	49
		15:00:00	0	0	5	0	0	1	0	19	9	2	0	48
		16:00:00	3	16	22	27	0	1	19	8	10	2	22	2
		17:00:00	0	0	0	7	58	4	0	24	0	4	0	43
		18:00:00	1	2	14	13	0	1	13	0	15	1	0	10
		19:00:00	1	0	0	0	0	0	32	1	16	4	0	4
	Dark	20:00:00	93	65	176	-	-	-	179	16	18	-	-	-
		21:00:00	88	64	154	216	47	46	93	113	31	22	19	94
		22:00:00	20	10	82	170	146	86	105	18	35	11	30	155
		23:00:00	46	29	118	285	222	29	131	88	75	14	7	66
		00:00:00	32	20	214	53	336	274	54	79	32	7	38	61
		01:00:00	10	61	13	45	91	49	104	40	67	17	11	94
		02:00:00	24	2	20	60	18	12	65	5	20	3	3	11
		03:00:00	20	5	22	33	0	38	48	40	39	0	0	6
		04:00:00	22	3	13	46	23	27	15	8	24	5	9	17
		05:00:00	22	3	225	164	199	84	55	35	37	18	8	22
		06:00:00	41	5	61	68	55	97	9	77	40	19	10	47
		07:00:00	7	39	167	46	28	12	64	4	5	9	5	41
		08:00:00	0	1	75	162	16	3	0	3	12	9	1	16

[truncated: 9 more sheets: S1F, S1G, S1H-K, S1L, S2A, S2B-C, S2D-E, S2F-G, S2I]
