# Supplementary material for: Brown adipose tissue and skeletal muscle coordinately contribute to thermogenesis in mice
Source: eLife. 2025 Oct 27;13:RP99982. doi: 10.7554/eLife.99982 (PMC12558653; doi:10.7554/eLife.99982)
Supplement: Figure 2—source data 1. [file elife-99982-fig2-data1.xlsx]

## Sheet: Fig.2A-B
(A and B) Concentrations of carbohydrate metabolites (A) and amino acids (B) in sham-operated or denervated iBAT of mice without (control) or at the indicated times after bilateral cast immobilization.
n mol/g tissue weight	Sham												Denervated
	Control 1	Control 2	Control 3	Imm (24 h) 1	Imm (24 h) 2	Imm (24 h) 3	Imm (day 3) 1	Imm (day 3) 2	Imm (day 3) 3	Imm (day 5) 1	Imm (day 5) 2	Imm (day 5) 3	Control 1	Control 2	Control 3	Control 4	Control 5	Imm (24 h) 1	Imm (24 h) 2	Imm (24 h) 3	Imm (24 h) 4	Imm (24 h) 5	Imm (day 3) 1	Imm (day 3) 2	Imm (day 3) 3	Imm (day 3) 4	Imm (day 3) 5	Imm (day 5) 1	Imm (day 5) 2	Imm (day 5) 3	Imm (day 5) 4
Glucose 6-phosphate	165.481	184.172	275.212	220.921	203.835	294.129	249.472	299.056	203.808	382.863	293.454	360.932	513.24	428.447	428.035	656.294	426.177	621.741	374.598	357.939	418.147	410.407	299.861	183.458	592.754	201.224	183.425	263.562	165.041	203.093	239.814
Fructose 6-phosphate	50.1913	44.9438	74.1728	58.1659	58.6723	83.1924	71.2338	80.4225	56.4764	102.892	76.0454	101.763	145.835	104.267	117.326	180.911	120.727	179.359	103.628	93.0995	108.17	99.6223	80.4978	48.0459	151.569	48.9409	46.2223	70.3415	39.8013	55.0713	65.5662
Fructose 1,6-diphosphate	62.5454	27.9765	45.3933	36.5331	31.3317	62.1877	106.124	113.981	42.5637	78.9101	68.6302	71.1916	353.408	213.564	176.984	199.268	133.31	337.804	276.453	244.963	284.388	190.242	217.217	135.285	260.245	132.295	107.613	128.307	113.595	134.757	195.468
3-Phosphoglyceric acid	22.6293	21.963	25.7078	18.101	31.343	31.8321	22.8389	42.8857	33.2105	46.1927	36.9412	41.5648	24.9693	16.3398	11.1712	29.5417	19.1659	18.355	19.1314	20.0432	26.0073	9.612	14.1017	16.5154	18.5224	14.1935	24.1962	14.768	21.423	15.1008	26.7642
2-Phosphoglyceric acid	19.6149	15.5104	5.70832	16.5536	22.1803	19.3775	4.49473	11.662	14.6782	26.3707	24.574	11.4109	26.1357	18.064	10.7646	31.4493	21.0487	20.2918	21.1502	22.1581	26.308	8.91665	11.1718	18.2581	19.9299	12.3031	24.1646	16.3263	23.6835	14.6151	28.6077
Lactic acid	7109.36	9784.52	9429.34	8536.17	9006.58	11808.6	10435.2	14755.8	10025.1	18404	12014.9	10368.6	5920.12	7625.21	8096.55	9230.05	11676.6	5474	7981.5	3759.15	6761.77	9371.18	4003.2	9970.41	8047.68	5558.78	5045.21	6081.83	5248.39	6063.8	6506.09
6-Phosphogluconic acid	30.0763	28.534	29.5437	36.0368	25.9948	28.1232	55.943	51.5605	39.1585	42.0393	42.009	36.8621	64.2604	54.9612	15.8174	21.5928	40.3242	52.9989	51.1979	48.6398	50.3259	43.0596	24.1849	32.0341	50.0276	26.8713	26.4577	29.5273	26.7557	31.7475	50.6222
Ribulose 5-phosphate		51.6786	42.6525	37.4179		50.1577	76.3296	72.7711		86.4274	48.0434	85.5488	78.5433	63.5431	58.6042	63.6281	43.9038	56.114	56.8262	48.7912	50.2151	46.2326	32.1316	29.5009	49.048	38.5773	28.3166	40.1881	34.0657	35.2503	64.3258
Sedoheptulose 7-phosphate	7.71797	8.66981	13.6717	10.0381	16.4296	14.6738	13.2026	16.3774	10.3969	18.0799	15.2118	22.7914	27.1496	17.7116	21.3269	35.6384	20.0413	37.2012	16.1059	13.5353	13.2025	15.1028	10.8119	6.60894	24.2566	6.1178	5.10595	7.95684	3.9996	6.57118	9.72841
Citric acid	91.3329	80.7018	240.001	142.568	133.724	220.964	203.697	315.564	206.794	167.521	118.846	147.394	315.028	268.97	312.309	270.753	270.339	365.326	367.349	172.514	180.592	294.014	265.885	215.407	293.508	215.956	165.819	235.311	173.293	260.503	292.859
Succinic acid	6.42012	10.0943	11.1334	17.1084	22.229	16.1235	10.9565	11.4743	10.4062	15.3597	8.95858	11.2847	3.78072	7.17353	3.89474	3.54287	8.16236	4.4081	4.7008	1.9425	1.48247	5.2177	2.75697	6.97614	5.94885	4.63814	2.1775	4.71573	4.34679	5.79441	2.94703
Malic acid	82.1846	63.4667	132.927	103.346	81.8818	240.881	169.127	182.058	147.487	171.351	114.855	120.325	493.714	368.302	538.43	530.447	163.075	317.317	252.72	191.271	159.039	319.859	453.865	211.327	411.251	252.489	210.492	208.839	227.02	310.627	309.42
Glucose 1-phosphate	30.6249	28.8294	41.7547	50.9953	41.1157	44.6615	40.8837	47.6805	31.2188	64.1156	58.6124	50.1087	89.2337	58.7715	61.9868	83.2672	65.1522	102.627	59.5255	57.917	55.6896	53.7916	48.714	36.1879	81.1208	29.9965	25.1437	41.2158	27.1346	34.9301	37.8985
Glycerol 3-phosphate	28.3902	25.2352	10.1209	11.4235	14.4914	9.21565	17.0005	18.4557	13.996	14.4402	153.447	8.15326	20.2877	20.8833	15.0774	12.077	10.3059	20.3962	19.0168	17.1984	18.1078	15.4301	17.6842	15.4487	14.3268	24.7222	39.1308	13.6381	29.6138	22.8196	42.8581
n mol/g tissue weight	Sham												Denervated
	Control 1	Control 2	Control 3	Imm (24 h) 1	Imm (24 h) 2	Imm (24 h) 3	Imm (day 3) 1	Imm (day 3) 2	Imm (day 3) 3	Imm (day 5) 1	Imm (day 5) 2	Imm (day 5) 3	Control 1	Control 2	Control 3	Control 4	Control 5	Imm (24 h) 1	Imm (24 h) 2	Imm (24 h) 3	Imm (24 h) 4	Imm (24 h) 5	Imm (day 3) 1	Imm (day 3) 2	Imm (day 3) 3	Imm (day 3) 4	Imm (day 3) 5	Imm (day 5) 1	Imm (day 5) 2	Imm (day 5) 3	Imm (day 5) 4
Gly	905.349	1119.37	943.31	837.521	904.051	891.039	1115.68	1590.71	887.26	1425.13	1075.22	1135.84	1749.62	1720.4	1817.3	1583.09	1545.22	1890.37	1733.79	1539.73	1694.16	1953.58	1285.13	1434	1561.74	1489.96	1392.03	1242.42	1354.58	1489.53	1987.86
Ala	1595.11	1903.52	1451.44	1505.38	2059.28	1842.18	1601.33	2323.14	1580.01	2271.97	1950.02	1902.36	3152.96	3331.92	3407.57	2291.16	2738.44	2538.02	2683.76	2199.04	3264.48	2825.56	1638.32	2709.24	2491.93	2643.82	2187.37	1859.17	2090.8	2057.22	2843.66
Ser	632.743	775.383	552.828	573.446	739.92	523.468	824.815	966.359	568.687	848.531	682.241	815.394	1026.56	1010.38	871.835	838.217	833.046	1041.16	1095.38	849.54	1119.09	1092.24	700.108	747.107	842.541	803.229	692.487	662.698	691.524	723.703	1029.38
Pro	213.014	229.385	173.453	200.819	219.962	195.978	231.144	325.235	192.837	304.194	200.591	263.481	388.319	371.69	330.451	305.032	293.008	351.564	425.375	280.351	347.851	407.607	257.07	275.075	266.49	307.211	235.484	216.863	275.062	255.775	395.78
Val	327.168	341.157	313.087	320.502	343.995	337.398	350.241	467.311	307.798	448.356	372.252	404.912	494.297	497.422	418.19	448.489	414.497	453.171	532.314	404.412	521.358	503.192	321.904	351.365	373.042	359.255	293.46	321.499	315.238	280.616	479.253
Thr	353.004	459.089	364.47	346.077	372.843	387.747	444.572	793.06	408.606	567.552	507.067	494.62	491.217	515.367	427.128	474.764	475.888	483.843	581.157	446.348	635.065	603.247	322.744	389.621	406.283	399.087	371.089	306.054	369.187	393.832	562.704
Ile	138.383	162.385	118.605	156.494	146.76	154.624	161.516	262.736	146.102	241.13	196.982	208.415	242.646	262.927	216.763	206.091	222.026	235.553	267.35	204.559	252.849	269.749	158.416	188.312	202.111	180.955	144.538	146.656	145.083	141.842	233.665
Leu	358.325	397.814	328.939	376.358	363.079	363.213	422.083	610.889	353.655	640.706	514.117	566.545	624.509	676.504	500.994	572.263	571.07	593.865	681.275	482.272	676.168	702.639	425.29	472.407	490.308	458.361	354.252	388.686	380.634	352.573	572.03
Asn	121.867	148.855	120.025	138.467	144.28	117.99	151.387	189.909	123.33	181.223	166.389	181.815	232.97	244.016	208.878	216.643	234.42	232.193	270.667	222.744	237.043	304.72	184.055	199.12	233.191	213.303	159.176	168.017	161.778	172.008	245.104
Asp	240.49	248.496	207.522	266.274	327.021	236.603	285.801	348.722	244.918	297.472	313.269	288.472	776.137	843.565	780.464	659.763	713.885	851.567	742.346	703.275	673.851	805.556	647.261	657.829	673.503	619.129	558.249	551.514	571.88	531.952	777.57
Gln	1554.58	2641.31	1490.81	1075.22	1658.01	1481.59	2098.74	2706.23	1628.04	1752.33	1760.72	1649.7	3896.62	4493.15	3656.75	2743.58	3636.22	3014.18	3740.78	3081.68	3287.8	3577.28	2322.87	3705.58	3214.94	3212.75	2664.91	2397.04	2879.6	2836.7	3766.69
Lys	419.663	447.336	433.41	520.459	493.972	563.729	488.411	924.645	477.82	852.007	596.781	676.551	719.255	719.51	616.355	557.757	560.512	651.004	772.909	577.964	751.463	778.224	474.689	492.479	608.859	503.089	438.897	445.535	466.559	477.894	697.44
Glu	683.592	725.304	672.636	723.354	686.489	683.647	948.708	1136.41	725.009	738.516	753.952	852.355	2147.27	2239.61	2330.83	1553.16	1499.82	1904.89	1684.79	1501.37	1352.66	1663.56	1647.88	1472.88	1623.14	2001.1	1448.69	1143.39	1384.91	1382.54	1847.26
Met	127.88	135.019	121.264	132.231	125.642	110.776	122.043	185.576	110.084	179.184	144.457	154.825	2388.6	2596.56	1844.09	1845.16	2206.31	2141.67	2557.52	1949.32	2550.81	2562.33	1638.16	1746.87	1957.07	1760.57	1418.18	1361.32	1471.31	1459.06	1992.7
His	142.439	170.293	133.19	142.149	145.115	139.666	168.651	224.821	135.617	187.109	160.403	187.199	219.045	229.842	200.151	178.527	179.885	210.419	237.914	169.828	252.07	233.707	147.441	163.579	185.028	176.006	147.264	152.125	153.885	160.24	231.126
Phe	179.506	208.95	170.592	207.712	210.53	186.759	226.387	301.994	186.814	300.309	244.194	277.217	280.245	297.661	230.447	231.627	252.277	261.559	307.534	224.274	307.876	308.334	189.193	220.382	233.977	216.578	180.548	183.16	197.004	195.394	304.901
Arg	302.679	316.8	288.161	349.012	322.566	301.543	369.961	540.831	316.386	464.494	415.13	379.81	448.506	490.23	225.028	343.609	422.352	340.316	460.453	346.199	539.564	487.995	290.841	348.926	334.227	332.98	281.678	250.537	285.398	197.388	350.323
Tyr	153.125	177.038	136.377	173.723	187.192	153.999	207.529	279.916	168.767	241.045	208.409	224.202	238.774	241.261	213.441	185.035	210.529	224.306	250.2	196.48	250.667	261.57	165.254	182.736	222.792	214.606	164.16	173.713	197.689	180.783	271.646
Trp	39.0642	46.4629	38.9579	47.113	49.9879	44.0162	55.7445	69.4999	45.5582	55.3885	50.2796	54.4034	135.539	129.615	123.898	119.297	122.608	118.799	140.372	105.625	131.592	150.024	107.778	113.602	112.081	99.0063	95.8904	85.3174	99.3279	95.9246	153.666

## Sheet: Fig.2C-D
(C and D) RT and real-time PCR analysis of mRNA abundance for the fatty acid transporter CD36 and the succinate transporter SLC25A10 in sham-operated or denervated iBAT of control mice or mice subjected to bilateral cast immobilization for 24 h (n = 6 per group).
		Gapdh	Cd36	Cd36/Gapdh				Gapdh	Slc25a10	Slc25a10/Gapdh
Sham	Control 1	0.633598	0.518668	0.818607		Sham	Control 1	0.710484	0.320345	0.450882
	Control 2	0.63535	0.261048	0.410872			Control 2	0.412312	0.306917	0.744382
	Control 3	0.37156	0.356629	0.959816			Control 3	0.205066	0.15197	0.741075
	Control 4	0.586839	0.425918	0.725784			Control 4	0.549251	0.171358	0.311985
	Control 5	0.379755	0.245671	0.646921			Control 5	0.268092	0.305392	1.13913
	Control 6	0.680501	0.514247	0.755689			Control 6	0.654126	1.10895	1.69532
	Imm (24 h) 1	0.556499	0.438185	0.787395			Imm (24 h) 1	0.3666	0.387359	1.05663
	Imm (24 h) 2	0.249904	0.391735	1.56754			Imm (24 h) 2	0.259954	0.263614	1.01408
	Imm (24 h) 3	0.341964	0.536037	1.56752			Imm (24 h) 3	0.359193	0.596916	1.66183
	Imm (24 h) 4	0.423178	0.903026	2.13391			Imm (24 h) 4	0.272335	0.481955	1.76971
	Imm (24 h) 5	0.716325	1.08976	1.52131			Imm (24 h) 5	0.199803	0.378297	1.89335
	Imm (24 h) 6	0.400484	0.424134	1.05906			Imm (24 h) 6	0.128497	0.233448	1.81675
Denervated	Control 1	0.262081	0.157755	0.601931		Denervated	Control 1	0.262081	0.132243	0.504588
	Control 2	0.934129	0.21703	0.232334			Control 2	0.934129	0.276282	0.295764
	Control 3	0.428044	0.0570918	0.133378			Control 3	0.428044	0.0586803	0.137089
	Control 4	0.765061	0.103002	0.134633			Control 4	0.765061	0.0662858	0.0866412
	Control 5	0.848056	0.153487	0.180986			Control 5	0.848056	0.164954	0.194508
	Control 6	0.671164	0.109847	0.163667			Control 6	0.671164	0.0653631	0.0973877
	Imm (24 h) 1	1.07445	0.0902409	0.0839877			Imm (24 h) 1	1.07445	0.0415368	0.0386585
	Imm (24 h) 2	0.941938	0.219516	0.233047			Imm (24 h) 2	0.941938	0.114629	0.121694
	Imm (24 h) 3	0.903466	0.16083	0.178014			Imm (24 h) 3	0.903466	0.0787063	0.0871159
	Imm (24 h) 4	0.79767	0.260008	0.325959			Imm (24 h) 4	0.79767	0.177776	0.222869
	Imm (24 h) 5	1.36922	0.205402	0.150014			Imm (24 h) 5	1.36922	0.18607	0.135895
	Imm (24 h) 6	0.346296	0.286959	0.828654			Imm (24 h) 6	0.346296	0.285789	0.825274

## Sheet: Fig.2E
(E) Succinate content of sham-operated or denervated iBAT of control mice or mice subjected to bilateral cast immobilization for 24 h (n = 3–5 per group).
Succinate (n mole/g tissue)
Sham		Denervated
Control	Imm (24 h)	Control	Imm (24 h)
6.42012	17.1084	6.3012	7.34683
10.0943	22.229	11.9559	7.83466
11.1334	16.1235	6.49123	3.2375
		5.90479	2.47079
		13.6039	8.69616

## Sheet: Fig.2F-G
(F and G) Oxygen consumption rate (VO2) and respiratory exchange ratio (RER), respectively, for control mice and mice subjected to bilateral cast immobilization for 7 days (n = 6 per group).
Oxygen consumption
		Control 1	Control 2	Control 3	Control 4	Control 5	Control 6	Imm 1	Imm 2	Imm 3	Imm 4	Imm 5	Imm 6
Day 1	10:00:00	48.9512	66.5273	58.4084	28.2813	52.645	20.5337	52.4227	30.8366	55.0801	64.3576	60.0864	66.6201
	11:00:00	55.2995	59.2794	60.0434	60.7156	42.2802	23.4623	52.3444	63.9683	62.1006	48.5256	52.1694	56.4993
	12:00:00	48.7413	54.2775	46.8148	48.3267	31.9793	57.2779	49.0995	54.5376	55.5373	53.7501	46.7183	48.9091
	13:00:00	48.1433	61.3335	51.6591	42.0703	37.246	51.9568	42.4629	42.311	53.3048	48.7076	47.1144	36.9988
	14:00:00	41.7241	43.2505	42.7452	46.5919	31.1512	48.0401	37.562	45.4294	51.5411	45.2369	45.6758	39.2009
	15:00:00	55.8265	39.1975	44.4568	37.4319	35.3358	38.9135	45.8498	44.5358	52.435	45.8542	49.555	44.2424
	16:00:00	42.4982	61.667	45.4461	35.4265	33.5534	42.5854	46.5223	42.4417	55.8509	44.9782	46.4971	38.2292
	17:00:00	40.4023	41.0391	38.9877	36.1591	32.8871	37.774	46.6362	47.9521	56.6562	42.24	47.324	38.2472
	18:00:00	40.3617	42.4717	43.7691	45.5557	35.808	38.4048	44.7436	47.6476	51.8768	44.7397	45.8468	38.1876
	19:00:00	52.9957	47.5098	44.0781	36.7581	36.5237	40.6312	40.0804	49.4446	57.1522	42.5322	50.0096	41.7608
	20:00:00	43.0713	45.4502	57.0061	53.6502	44.7746	47.7052	43.3365	54.6874	50.389	49.211	47.0923	39.3034
	21:00:00	42.1441	59.6297	54.9877	48.0925	50.3073	65.3125	51.455	49.2136	56.4007	49.5496	56.1534	49.6398
	22:00:00	58.6446	71.7873	52.8679	65.0101	56.2383	64.9789	49.1854	47.1114	62.2336	53.7403	58.4787	55.9017
	23:00:00	59.0995	69.2671	68.3498	63.1684	66.0259	64.122	64.0536	59.5206	50.9617	51.5921	52.9847	50.5906
	1900-01-01	62.607	66.6184	55.9632	69.0804	59.9724	59.2519	53.8012	62.9848	55.9685	58.9993	59.1108	51.699
	1900-01-01 01:00:00	47.8792	53.1383	54.6269	55.9839	53.4994	63.8681	47.7076	50.5406	52.664	53.7578	51.811	54.0912
	1900-01-01 02:00:00	46.4902	75.1322	56.1991	55.0718	49.216	59.2659	53.1114	48.9482	63.1741	52.3578	54.3093	47.8271
	1900-01-01 03:00:00	44.3382	55.1464	57.617	61.8653	47.2308	52.945	48.0378	55.8994	53.9954	50.7231	55.0616	46.4185
	1900-01-01 04:00:00	42.8973	42.9624	50.1589	51.3701	55.1097	51.8589	50.7939	54.2113	49.2014	44.4025	54.6847	45.022
	1900-01-01 05:00:00	50.8376	48.0665	51.1851	54.1141	43.7295	60.0579	45.4421	45.4334	48.4665	45.6404	51.0006	51.9518
	1900-01-01 06:00:00	39.5883	50.7918	48.6599	61.4062	49.7286	66.8466	51.0359	47.0657	56.8368	58.2831	55.8724	46.0316
	1900-01-01 07:00:00	58.7189	73.3247	55.6667	60.5541	40.1893	53.745	58.9542	57.9086	52.642	47.7173	56.4415	46.0843
Day 2	1900-01-01 08:00:00	35.107	42.3567	47.9249	56.2621	55.2459	65.287	37.4554	41.4071	50.2089	57.3799	56.1204	55.462
	1900-01-01 09:00:00	41.3193	43.0162	34.529	46.3877	42.1124	49.5953	44.3663	43.6971	42.0457	50.2082	60.8603	53.073
	1900-01-01 10:00:00	39.782	31.185	35.6301	38.9791	30.7036	45.5297	37.932	49.0841	45.9708	44.8087	49.4266	48.5369
	1900-01-01 11:00:00	34.0206	41.137	45.7003	39.5567	31.6304	41.3967	36.3643	38.4345	42.7395	41.1343	45.3964	44.4801
	1900-01-01 12:00:00	33.3089	36.553	33.6076	32.0391	30.4062	38.2698	39.4736	40.9082	48.3968	39.4974	55.9629	43.0308
	1900-01-01 13:00:00	35.5957	30.2395	38.4183	32.3292	33.3392	40.8887	35.6501	44.4959	45.9541	44.7019	48.8656	52.1858
	1900-01-01 14:00:00	35.7929	41.5432	38.7885	43.3216	29.69	38.777	42.5945	42.4808	40.2229	54.4932	45.6211	39.8298
	1900-01-01 15:00:00	36.2819	30.9967	36.1533	28.9637	27.703	36.6043	36.5105	43.5072	48.5052	37.1644	48.2155	47.3395
	1900-01-01 16:00:00	40.4952	36.3675	50.2568	31.9597	28.9249	42.7032	35.6741	39.3121	38.9128	47.0882	50.923	45.1403
	1900-01-01 17:00:00	30.7872	31.8749	32.4003	32.5893	39.8504	34.642	37.9834	42.9201	42.1928	40.3904	50.4146	41.7024
	1900-01-01 18:00:00	39.2648	42.3581	44.5651	28.7337	27.1338	36.8168	46.2695	52.2887	46.1873	35.7607	44.7646	44.1049
	1900-01-01 19:00:00	52.2019	59.9778	45.9716	38.8341	30.5568	41.9529	39.7868	55.8962	50.119	38.2832	44.7213	39.9147
	1900-01-01 20:00:00	48.7526	62.7649	59.3714	46.7709	42.182	50.9194	43.6126	47.4528	47.7561	55.2967	53.191	55.1845
	1900-01-01 21:00:00	51.049	58.8445	54.8829	52.7425	50.7924	59.6797	46.9265	55.1689	48.8427	52.8204	56.8937	62.158
	1900-01-01 22:00:00	56.998	50.9879	47.3421	63.9208	57.6904	60.284	40.947	49.2988	55.1829	48.1598	54.4483	74.7099
	1900-01-01 23:00:00	52.7667	40.3426	54.5665	64.1078	61.4478	66.7538	55.9652	52.7874	49.2666	59.8011	72.3909	68.8691
	1900-01-02	44.6149	41.8677	50.1705	54.9922	59.854	68.2346	40.6954	46.1774	46.2829	54.185	54.0717	50.0499
	1900-01-02 01:00:00	41.6924	61.0316	46.856	49.7287	57.5809	60.3991	41.6132	42.7822	49.9845	48.3959	62.4329	64.1068
	1900-01-02 02:00:00	49.995	39.7131	45.8478	51.099	58.5754	52.7227	41.5706	45.5959	44.379	57.5441	52.1064	45.8644
	1900-01-02 03:00:00	38.548	51.3864	44.9142	50.6682	52.911	57.1937	47.6112	42.4512	39.6209	49.6418	56.7887	51.1234
	1900-01-02 04:00:00	44.5807	43.5102	45.9591	51.3119	50.3629	58.2354	46.2521	46.9256	45.0085	49.0889	53.7844	52.6206
	1900-01-02 05:00:00	52.1932	54.7644	56.9086	54.1191	50.6602	58.7089	50.67	53.8657	52.0438	51.4202	62.6251	61.5046
	1900-01-02 06:00:00	44.7497	42.7648	38.3299	55.251	48.0822	55.9434	34.4434	35.2029	41.5262	54.8242	56.4335	59.4571
	1900-01-02 07:00:00	28.5967	37.2066	37.7029	49.8055	37.5863	54.6679	36.9177	33.6942	47.468	53.2747	57.3407	51.7351
Day 3	1900-01-02 08:00:00	27.3859	36.2758	36.3751	49.3307	33.6089	57.9531	29.2683	31.8115	37.1111	51.5364	58.4913	55.2324
	1900-01-02 09:00:00	27.5847	30.4182	38.9486	43.323	43.7967	47.7931	34.8526	33.237	40.2203	42.755	55.6753	42.275
	1900-01-02 10:00:00	37.0476	41.6864	34.7438	46.9275	31.0744	44.1499	35.9348	34.0786	44.1386	38.3327	50.9204	39.8127
	1900-01-02 11:00:00	27.8413	27.0751	38.6367	35.1203	29.8692	42.1224	42.5284	34.3996	43.1509	37.6094	49.2341	51.7754
	1900-01-02 12:00:00	35.7032	35.7196	37.172	42.9863	32.5285	43.0259	45.7702	32.9421	39.9108	42.3849	43.9584	40.0511
	1900-01-02 13:00:00	28.8651	33.3271	43.2221	31.4847	27.6276	39.8002	50.0894	35.5229	41.8189	37.0598	46.3263	47.3752
	1900-01-02 14:00:00	44.5743	42.284	44.7101	37.1979	40.6073	39.3461	49.9703	48.5968	50.78	34.3698	50.4462	37.5425
	1900-01-02 15:00:00	62.0404	59.3433	46.6357	31.7158	26.7067	40.4665	54.0997	50.3478	47.1168	39.5968	47.4549	35.8764
	1900-01-02 16:00:00	50.2867	58.4147	54.4123	35.4585	31.1562	35.677	63.104	51.2849	54.938	35.0938	48.5355	42.4091
	1900-01-02 17:00:00	46.9662	50.4571	52.0413	35.8143	30.9482	36.7079	53.2049	50.7045	46.1541	39.5386	42.4374	40.4602
	1900-01-02 18:00:00	53.6725	49.397	47.4309	39.0859	33.8146	41.9079	69.0354	51.9615	59.1671	35.0404	48.0502	40.5869
	1900-01-02 19:00:00	50.8773	51.6296	42.0996	34.8147	27.8812	38.106	48.7948	55.9054	48.518	38.6567	46.9365	41.3794
	1900-01-02 20:00:00	40.1409	56.6816	43.0904	46.8937	43.2316	55.2081	59.5288	47.2448	49.3852	51.5975	56.8731	52.1578
	1900-01-02 21:00:00	47.7659	37.728	41.8652	59.3217	53.9984	63.3212	62.1384	49.1751	41.8227	56.9716	66.9207	62.2229
	1900-01-02 22:00:00	33.4496	45.4093	42.5196	67.4265	58.9547	56.9978	56.1335	46.4405	48.6756	54.5806	64.9276	66.8168
	1900-01-02 23:00:00	38.0617	45.499	43.7252	59.216	63.4807	62.5195	45.369	54.5361	41.9504	50.6486	72.4591	63.3841
	1900-01-03	49.199	58.8681	49.4803	57.6133	62.8265	69.4507	66.5626	46.4245	53.1019	64.7807	77.7786	53.4417
	1900-01-03 01:00:00	49.3772	46.8986	54.0505	52.7986	53.4717	74.6615	55.8719	55.9024	48.1955	53.9302	56.1052	52.9779
	1900-01-03 02:00:00	41.2416	37.7508	54.6212	56.6418	52.1827	55.4864	59.999	42.052	46.3524	61.073	70.4104	53.2145
	1900-01-03 03:00:00	44.0851	38.1764	34.4246	57.9531	52.3791	52.3848	42.1565	46.1105	41.0888	60.149	67.8	51.9054
	1900-01-03 04:00:00	30.9181	35.9154	44.9012	47.4283	55.7985	48.6501	35.1793	35.2882	39.4539	54.7455	64.4589	52.6098
	1900-01-03 05:00:00	36.2882	29.9273	32.0503	46.2782	49.8444	65.1907	44.6532	33.8109	41.4549	49.5543	70.3052	57.9933
	1900-01-03 06:00:00	43.3737	35.1759	35.1522	51.2515	43.8528	52.5969	35.3854	33.7854	31.864	58.2147	74.2615	52.4872
	1900-01-03 07:00:00	39.102	49.22	46.2624	52.3164	38.2985	47.7008	52.9489	46.5746	53.1402	55.8971	68.3396	52.1411
Day 4	1900-01-03 08:00:00	38.1762	33.1598	37.7938	56.2488	36.4735	60.0646	52.8649	43.9928	45.8259	52.5354	55.6542	52.1862
	1900-01-03 09:00:00	39.3759	40.5473	34.5407	41.8399	39.6766	49.6398	43.3372	42.0495	58.6861	50.7344	62.177	48.4067
	1900-01-03 10:00:00	40.3793	33.0064	42.8896	40.3523	31.068	52.2092	40.729	42.9968	46.4565	42.5734		48.6048
	1900-01-03 11:00:00	32.985	37.7578	33.9883	36.5975	35.3809	48.6855	43.6799	41.3544	48.8958	44.3448	82.7752	45.9132
	1900-01-03 12:00:00	43.2479	32.7541	39.7187	41.1148	32.2755	49.3375	53.3954	41.2161	43.4826	43.3247	54.4676	48.1749
	1900-01-03 13:00:00	39.0645	41.861	36.8478	40.8874	36.1485	48.9859	55.0511	38.3936	58.1729	39.7672	57.3834	54.32
	1900-01-03 14:00:00	52.4854	42.2341	52.028	37.6742	29.782	49.2675	59.8474	55.0321	56.2358	34.8782	48.4658	42.3562
	1900-01-03 15:00:00	52.4408	53.8562	51.9531	36.8551	36.2504	43.2765	52.7509	62.1576	55.4331	43.7857	46.1797	41.6298
	1900-01-03 16:00:00	48.5795	49.1454	51.2247	33.4831	38.2918	43.2886	52.1445	53.5214	57.8924	37.5219	51.4138	41.4409
	1900-01-03 17:00:00	56.564	53.9029	55.927	40.0618	30.1654	49.1337	60.1681	54.9556	52.492	38.1954	46.6442	60.1543
	1900-01-03 18:00:00	47.992	52.4079	52.5333	32.0031	32.8926	41.8543	68.7713	63.9199	65.3801	40.9459	47.5728	47.6246
	1900-01-03 19:00:00	54.7467	55.2867	53.5405	41.2425	35.1399	47.3825	59.2459	59.5475	56.7941	46.6856	48.1432	41.7218
	1900-01-03 20:00:00	48.7778	45.0653	39.5511	46.4554	38.2923	54.85	62.0388	52.5141	62.4358	43.658	51.4106	60.3507
	1900-01-03 21:00:00	39.0978	45.649	41.5437	65.1103	55.9123	68.7924	50.8892	52.5642	60.6453		65.2258	62.8817
	1900-01-03 22:00:00	39.4399	43.5505	41.2999	71.848	63.3597	75.1765	54.0408	55.2322	62.5252		67.2522	71.8875
	1900-01-03 23:00:00	48.0378	46.1045	47.074	66.0714	72.437	78.5471	65.8628	57.628	67.0632	67.1124	72.7001	64.6293
	1900-01-04	52.3042	62.1038	45.7387	56.402	60.2204	72.4456	56.518	57.7691	62.2338	51.5449	68.0299	64.2781
	1900-01-04 01:00:00	51.1594	45.0731	49.8618	61.2877	55.1861	76.0442	64.9465	49.2815	69.9612	55.3628	59.7664	67.2846
	1900-01-04 02:00:00	36.8088	35.2608	39.1783	59.0566	55.6353	83.2726	57.2483	40.4329	50.3374	47.7846	59.8342	67.5451
	1900-01-04 03:00:00	30.3801	40.1654	35.7399	53.0578	48.3295	70.9302	49.5092	40.3433	56.5596	50.132	63.8069	51.8762
	1900-01-04 04:00:00	45.0598	30.0206	34.3376	50.7607	54.7197	73.7623	54.7232	38.4269	49.1196	54.7791	67.309	56.6775
	1900-01-04 05:00:00	28.5187	34.1289	49.268	52.8753	50.8594	72.2016	42.9296	42.1618	44.8382	60.3524	67.5339	61.027
	1900-01-04 06:00:00	34.0162	31.0759	32.9505	63.5099	44.8977	71.0963	44.2764	34.473	53.6834	55.0472	73.2325	55.1426
	1900-01-04 07:00:00	29.9101	39.6838	43.5914	60.7389	42.5864	67.0871	60.1361	48.6211	48.896	58.9568	69.4287	58.0148
Day 5	1900-01-04 08:00:00	30.7369	30.4552	34.4402	49.987	39.3774	64.2451	48.7051	38.3684	45.0103	50.3166	67.3016	50.7014
	1900-01-04 09:00:00	41.3002	34.988	43.1667	53.4191	51.4119	58.8921	42.0283	41.253	50.076	47.3296	57.3779	44.1848
	1900-01-04 10:00:00	33.2446	31.7271	32.5787	48.9424	40.1625	51.6926	42.2139	48.1492	45.7821	51.8573	65.7336
	1900-01-04 11:00:00	38.2227	37.8851	40.9365	42.6506	34.8228	53.9447	52.8198	43.0843	45.4688	39.7794	58.4056	70.9796
	1900-01-04 12:00:00	53.2628	44.0537	53.8632	37.595	36.4597	48.7458	57.6832	59.6831	57.0597	46.1338	53.3335	61.2037
	1900-01-04 13:00:00	63.911	50.8272	52.508	41.9584	34.0174	47.0818	63.0379	64.0347	64.6994	45.2107	46.4892	47.5581
	1900-01-04 14:00:00	48.269	54.059	53.9024	33.6143	32.9078	53.3422	67.3687	52.5082	54.9	48.1889	58.7728	59.7278
	1900-01-04 15:00:00	50.9885	53.2894	59.5501	34.2582	36.3004	43.8289	64.2745	68.2905	69.2335	37.9541	53.5994	49.1603
	1900-01-04 16:00:00	55.4303	49.4946	49.9775	41.2356	33.9088	47.1344	62.573	53.1817	63.5362	46.0493	46.119	39.0339
	1900-01-04 17:00:00	51.5884	57.3438	54.3187	32.5621	33.2146	49.1926	71.4246	56.6113	66.8018	53.693	47.3734	49.0622
	1900-01-04 18:00:00	48.9951	48.7029	45.549	31.5104	34.9225	44.2747	59.3457	69.3077	66.6024	38.5778	48.6706	55.7619
	1900-01-04 19:00:00	46.3478	41.8783	38.0517	45.8004	39.3403	47.6786	64.5371	57.2508	66.5988	51.8273	45.5858	42.135
	1900-01-04 20:00:00	43.4715	44.705	43.5081	56.1659	49.0607	59.9191	50.31	58.281	63.0291	71.032	65.2	53.0857
	1900-01-04 21:00:00	49.3078	52.9419	41.7858	58.7301	63.4411	67.4504	57.4394	43.959	61.3709	63.6571	69.4991	62.7331
	1900-01-04 22:00:00	46.7768	43.9707	48.8655	62.1664	66.0289	72.5075	73.2614	62.7397	69.3754	69.6078	67.037	68.9014
	1900-01-04 23:00:00	52.613	45.6899	56.736	71.9273	70.4223	76.5801	70.7651	66.1775	59.6696	58.58	75.5539	58.9658
	1900-01-05	40.2593	38.4419	54.438	56.8657	61.019	78.734	52.7766	49.9756	61.461	68.0025	72.9728	65.0934
	1900-01-05 01:00:00	42.9301	38.5835	42.8444	55.3759	51.9939	83.1492	60.8025	50.8803	52.5319	71.242	62.9578	52.1652
	1900-01-05 02:00:00	34.9229	32.8335	44.912	58.6285	50.6144	72.3292	51.0982	45.4405	55.1847	60.8497	65.8772	64.5259
	1900-01-05 03:00:00	32.9784	39.3056	41.2475	55.5206	52.4101	69.5773	39.8582	39.1379	51.4084	60.0749	64.4898	67.2669
	1900-01-05 04:00:00	44.0607	36.1455	55.7447	54.7629	53.6407	70.968	41.9392	48.9614	61.6459	63.6835	67.1197	62.9209
	1900-01-05 05:00:00	29.6365	31.7098	42.5086	57.0271	53.4472	72.9516	53.8896	44.1418	52.3221	64.5814	67.9107	67.4823
	1900-01-05 06:00:00	37.7822	38.0574	42.1383	57.5407	50.3129	69.8355	42.6983	45.4102	61.284	66.3371	67.7378	64.728
	1900-01-05 07:00:00	37.016	29.545	45.4178	56.305	40.6375	64.6599	41.2143	47.376	50.818	57.436	67.8412	61.9458
Day 6	1900-01-05 08:00:00	31.8937	30.1259	42.1737	45.7123	43.7496	60.2188	65.9696	47.2878	51.3089	60.2942	59.2519	59.6645
	1900-01-05 09:00:00	42.1764	44.2059	48.3608	44.1691	38.3784	60.6365	45.4371	50.7933	52.3037	50.1933	61.6172	47.3344
	1900-01-05 10:00:00	50.4551	48.0067	56.8935	45.409	36.8849	57.6287	62.6332	63.7174	66.4025	58.3197		51.6429
	1900-01-05 11:00:00	49.8885	52.3002	63.2801	45.536	35.7386	55.5363	64.7728	71.8778	70.914	53.5245	78.5981	52.1274
	1900-01-05 12:00:00	55.2559	56.9074	56.4129	45.309	40.1005	55.7862	73.1227	57.7772	74.5347	44.7869	56.8186	55.9947
	1900-01-05 13:00:00	63.0973	50.0147	61.8209	43.4086	31.8739	55.9929	69.1956	71.1429	74.8774	51.1594	54.9828	48.8182
	1900-01-05 14:00:00	57.9089	53.5238	55.2478	40.4958	35.2483	48.3716	65.4522	65.2306	72.0819	55.4709	47.2353	45.814
	1900-01-05 15:00:00	49.5427	58.1485	68.729	37.972	34.088	51.3131	72.5818	67.4644	57.7879	50.8061	48.124	51.7833
	1900-01-05 16:00:00	52.5216	46.8916	59.0958	35.9201	34.6732	48.1557	62.6729	60.4959	72.044	42.3101	48.6647	48.0338
	1900-01-05 17:00:00	46.5164	47.2059	54.9236	39.6597	40.0709	48.8021	64.1863	59.0875	63.6348	58.343	52.6332	46.5019
	1900-01-05 18:00:00	46.9318	47.5249	52.5215	36.0864	35.309	49.9889	57.4279	62.0556	64.7075	45.5297	45.8751	43.0626
	1900-01-05 19:00:00	51.7254	53.8833	53.605	41.5912	37.9799	51.1313	55.5864	63.9969	68.6832	58.4349	47.8636	48.3554
	1900-01-05 20:00:00	54.7318	54.6117	52.6737	51.971	45.0539	58.8391	70.1465	58.4818	75.5085	47.6697	56.9626	55.2473
	1900-01-05 21:00:00	49.6131	48.8395	53.2102	63.1158	59.3268	69.3083	71.5353	57.7913	70.3087	63.8244	64.735	62.4443
	1900-01-05 22:00:00	40.0392	41.2958	46.1146	70.2306	64.6113	71.0512	17.3909	49.0081	60.0231	69.6987	69.0977	63.6221
	1900-01-05 23:00:00	36.0535	34.6756	49.2287	59.8518	72.1899	81.1121	55.8429	43.5266	49.5632	71.6817	65.045	67.1972
	1900-01-06	37.3162	28.9036	40.4939	50.8404	65.0861	87.3199	55.6671	39.2027	59.4026	74.17	74.6173	58.025
	1900-01-06 01:00:00	30.5546	35.4862	46.2911	54.5864	46.9233	76.1548	53.162	52.3641	42.9397	68.6897	77.1628	73.8219
	1900-01-06 02:00:00	38.741	42.1836	44.0244	55.3543	52.0189	70.9799	44.4646	41.8155	52.1701	64.5639	56.1593	68.4946
	1900-01-06 03:00:00	36.4954	28.2442	46.6982	55.349	54.9149	71.8139	44.5379	39.3707	50.845	71.0138	69.7985	59.0501
	1900-01-06 04:00:00	30.8464	29.5834	43.5757	51.4044	42.7399	69.8448	35.6324	53.199	64.7239	61.9771	61.8228	73.9702
	1900-01-06 05:00:00	43.2546	42.2645	40.6226	50.4485	50.6738	75.6553	60.2938	50.7287	43.3208	67.0075	69.1929	66.4545
	1900-01-06 06:00:00	36.5784	34.2381	40.693	61.3848	55.9521	80.6709	45.7359	45.1508	54.1226	64.5588	74.756	64.4217
	1900-01-06 07:00:00	37.4592	34.9004	45.001	54.6723	40.2013	65.8633	40.3929	44.923	56.5467	67.5334	58.615	60.2554
Day 7	1900-01-06 08:00:00	52.5582	50.7337	58.4253	60.1391	38.2934	66.7864	61.6761	73.3894	63.0068	56.7284	61.3954	70.738
	1900-01-06 09:00:00	53.4612	56.6896	64.1371	45.1085	35.773	56.3098	67.1431	64.5717	60.3039	63.6098	52.318	60.7577
	1900-01-06 10:00:00	54.9035	51.1613	56.0568	50.1532	55.6978	71.3248	72.9702	67.6309	67.5777	60.5115	47.5437	58.702
	1900-01-06 11:00:00	59.645	55.5909	65.9612	37.9041	35.7758	57.6483	56.7467	62.7673	59.3872	50.5912	54.0727	54.8186
	1900-01-06 12:00:00	59.7526	52.0405	54.7064	43.7473	36.456	55.3819	63.155	68.5003	63.6634	50.7381	46.9982	55.0522
	1900-01-06 13:00:00	54.8521	46.4506	57.305	33.8395	49.008	54.5895	54.8384	47.4285	68.4426	47.0785	48.7236	64.766
	1900-01-06 14:00:00	54.8266	56.8131	51.2568	34.6411	33.8299	57.7654	65.0299	76.611	58.372	58.8065	48.4784	53.2701
	1900-01-06 15:00:00	49.9824	44.1552	47.9287	34.2371	36.497	51.4525	75.9621	67.8694	60.5658	54.1738	47.7153	57.0847
	1900-01-06 16:00:00	47.1445	46.5598	47.7752	37.5003	32.6806	52.0494	64.835	72.3647	59.5631	52.1638	56.2246	46.0622
	1900-01-06 17:00:00	47.3032	42.0351	50.9752	38.3147	43.5163	51.5774	57.7552	68.4388	73.1368	56.9067	42.8779	51.3326
	1900-01-06 18:00:00	57.3022	57.7992	51.5839	38.5751	33.1864	54.077	61.1872	64.0292	69.2021	49.9821	47.4748	48.8771
RER
		Control 1	Control 2	Control 3	Control 4	Control 5	Control 6	Imm 1	Imm 2	Imm 3	Imm 4	Imm 5	Imm 6
Day 1	10:00:00	0.892357	0.864919	0.872365	0.967172	0.851212	0.932777	0.861711	0.875006	0.816051	0.866537	0.917108	0.826645
	11:00:00	0.895031	0.833546	0.953433	0.856497	0.925416	0.875071	0.890922	0.830029	0.849893	0.911799	0.935664	0.876492
	12:00:00	0.904947	0.842244	0.937661	0.899083	0.94128	0.816238	0.904625	0.833716	0.847221	0.903651	0.935199	0.88018
	13:00:00	0.933687	0.928829	0.968527	0.9104	0.988793	0.838179	0.930838	0.838688	0.866064	0.914466	0.908249	0.899083
	14:00:00	0.954434	0.944541	0.965159	0.85816	1.02065	0.831176	0.922881	0.830572	0.845355	0.897151	0.905731	0.867162
	15:00:00	0.946937	0.979232	0.968896	0.90376	1.04119	0.84834	0.910756	0.855524	0.849398	0.906374	0.891811	0.873831
	16:00:00	0.979306	0.967454	0.958523	0.884399	1.03816	0.826849	0.954248	0.853174	0.901836	0.895387	0.880886	0.867885
	17:00:00	0.958288	0.998057	0.953616	0.853627	1.00193	0.824881	0.910152	0.85877	0.890896	0.88696	0.867088	0.865391
	18:00:00	0.966098	0.980568	0.955796	0.834064	1.03206	0.824147	0.873674	0.86735	0.857816	0.875792	0.871286	0.853039
	19:00:00	0.962317	0.9836	0.94545	0.861106	0.98644	0.82221	0.869159	0.901933	0.899005	0.875383	0.867172	0.863435
	20:00:00	0.977662	1.01211	0.945787	0.832515	1.01868	0.811915	0.864302	0.870253	0.876551	0.850715	0.879808	0.841434
	21:00:00	0.967709	0.966951	0.968884	0.873198	1.03261	0.790504	0.888405	0.825782	0.89227	0.846895	0.844442	0.833049
	22:00:00	0.949379	0.955576	0.971577	0.995628	1.05166	0.949799	0.858804	0.804524	0.89063	0.968679	0.928999	0.929856
	23:00:00	0.952914	0.96509	0.957455	1.02394	1.05604	0.991556	0.885248	0.838744	0.831051	0.974598	0.934341	0.957224
	1900-01-01	0.937844	0.960862	0.978052	1.03905	1.07081	1.01607	0.839353	0.895519	0.87585	0.973205	0.979245	0.970089
	1900-01-01 01:00:00	0.964338	0.937641	0.964055	1.06521	1.09478	1.02055	0.832391	0.838521	0.853167	0.99837	0.97649	0.981933
	1900-01-01 02:00:00	0.968488	0.924186	0.959516	1.08199	1.114	1.04425	0.879502	0.86928	0.895274	1.01518	0.980471	0.968667
	1900-01-01 03:00:00	0.946914	0.941101	0.93566	1.06171	1.1294	1.05962	0.859824	0.876652	0.846159	1.01349	0.955677	0.961132
	1900-01-01 04:00:00	0.941792	0.89092	0.87326	1.10862	1.12169	1.07884	0.856607	0.880928	0.845367	0.968235	1.00722	0.968086
	1900-01-01 05:00:00	0.89084	0.849511	0.848089	1.07828	1.13724	1.05161	0.839152	0.873551	0.81616	0.882393	0.967166	0.968532
	1900-01-01 06:00:00	0.911477	0.81986	0.86176	1.06562	1.11324	1.03716	0.85745	0.818509	0.840658	0.922385	0.940295	0.973642
	1900-01-01 07:00:00	0.863069	0.856044	0.907315	1.06999	1.13296	1.06402	0.85762	0.844252	0.81674	0.959326	0.938377	0.960885
Day 2	1900-01-01 08:00:00	0.979869	0.948494	0.883694	1.05854	1.06723	1.03447	0.863044	0.85558	0.886821	0.913885	0.944469	0.929034
	1900-01-01 09:00:00	0.986282	0.997597	1.00133	1.07436	1.08661	1.05074	0.855851	0.937735	0.885331	0.898656	0.891994	0.889502
	1900-01-01 10:00:00	0.989047	0.930563	0.933108	1.05487	1.11335	1.10184	0.867559	0.916684	0.892822	0.900962	0.882436	0.887103
	1900-01-01 11:00:00	0.958752	0.880334	0.896174	1.0086	1.13714	1.11999	0.819742	0.862177	0.880397	0.925514	0.910069	0.910992
	1900-01-01 12:00:00	0.917557	0.954459	0.887448	0.943981	1.06727	1.08589	0.814705	0.852208	0.860187	0.883851	0.880156	0.909244
	1900-01-01 13:00:00	0.914251	0.89936	0.847086	0.868646	0.991704	1.0193	0.809396	0.900931	0.840208	0.836078	0.832317	0.850405
	1900-01-01 14:00:00	0.889563	0.90959	0.824513	0.876309	1.06935	0.992503	0.814194	0.897342	0.836088	0.850938	0.853151	0.852773
	1900-01-01 15:00:00	0.920286	0.954823	0.815067	0.917663	1.03067	0.97313	0.872136	0.856343	0.819467	0.857768	0.857344	0.854294
	1900-01-01 16:00:00	0.947038	0.94388	0.877553	0.881055	0.987783	0.923789	0.850789	0.838161	0.846469	0.838883	0.831467	0.830774
	1900-01-01 17:00:00	0.925939	0.928977	0.928966	0.877121	1.01278	0.969248	0.822576	0.878931	0.812974	0.862044	0.83791	0.839503
	1900-01-01 18:00:00	0.947126	0.965833	0.878601	0.871688	1.10431	0.91393	0.838913	0.884607	0.824677	0.856838	0.826395	0.844473
	1900-01-01 19:00:00	0.93735	0.964762	0.914575	0.862848	1.04348	0.925237	0.901022	0.90962	0.868258	0.8503	0.834662	0.821131
	1900-01-01 20:00:00	0.959975	0.961932	0.953616	0.967085	1.00792	0.992539	0.890926	0.868881	0.90768	0.907183	0.873372	0.904671
	1900-01-01 21:00:00	0.95687	0.972298	0.970559	1.00308	1.03341	1.02392	0.8981	0.900882	0.903802	0.954489	0.869706	0.951064
	1900-01-01 22:00:00	0.984946	0.982283	0.995679	1.04283	1.06468	1.04443	0.875512	0.909185	0.929358	0.999887	0.938145	0.989298
	1900-01-01 23:00:00	0.993486	0.949518	0.967062	1.05104	1.07544	1.05187	0.921284	0.947595	0.949736	0.992266	0.953345	1.00405
	1900-01-02	1.00886	0.893348	0.960404	1.0715	1.09261	1.05916	0.941208	0.925443	0.912273	0.989673	1.00629	1.04626
	1900-01-02 01:00:00	1.00628	0.908042	0.929468	1.08581	1.10294	1.06507	0.923508	0.863736	0.88389	0.970634	0.980999	1.03668
	1900-01-02 02:00:00	0.958167	0.90786	0.868868	1.06505	1.09261	1.07891	0.892035	0.84672	0.85494	0.933899	0.950991	1.06125
	1900-01-02 03:00:00	0.928404	0.896208	0.862845	1.07706	1.12579	1.08018	0.882339	0.832006	0.850409	0.908463	1.01482	1.06189
	1900-01-02 04:00:00	0.909174	0.918077	0.884517	1.07991	1.13136	1.08019	0.936909	0.908018	0.844455	0.894695	1.02238	1.06465
	1900-01-02 05:00:00	0.929542	0.90618	0.941253	1.06843	1.1255	1.0757	0.961842	0.884394	0.828177	0.900933	1.02529	1.05788
	1900-01-02 06:00:00	0.94005	0.906301	0.899773	1.06226	1.12686	1.0783	0.975004	0.870083	0.856454	0.862048	1.02709	1.0439
	1900-01-02 07:00:00	0.993346	0.896678	0.900742	1.08444	1.14655	1.09524	0.931119	0.864378	0.829461	0.915253	1.00617	1.0774
Day 3	1900-01-02 08:00:00	0.930319	0.900605	0.901194	1.06772	1.10121	1.06844	0.874521	0.858978	0.934051	0.86191	0.94751	1.05169
	1900-01-02 09:00:00	0.894092	0.964679	0.923347	1.0476	1.05119	1.04378	0.900865	0.85198	0.92358	0.882258	0.923615	1.03216
	1900-01-02 10:00:00	0.87156	0.92282	0.89358	1.00554	1.09627	1.03165	0.855374	0.853975	0.887516	0.906968	0.938226	1.0419
	1900-01-02 11:00:00	0.940858	0.934097	0.897438	0.996027	1.06682	1.00817	0.862981	0.830914	0.963244	0.883027	0.931207	1.02016
	1900-01-02 12:00:00	0.944398	0.882918	0.981149	0.916993	1.02758	0.971878	0.839767	0.825632	0.954176	0.872306	0.939166	1.03426
	1900-01-02 13:00:00	0.947116	0.94066	0.972544	0.934295	1.02823	0.95275	0.913068	0.811808	0.904252	0.877362	0.884419	1.00539
	1900-01-02 14:00:00	0.960275	0.932087	0.998724	0.875352	1.002	0.923997	0.909107	0.84853	0.897355	0.866192	0.882229	0.997141
	1900-01-02 15:00:00	0.954819	0.939912	0.992518	0.883064	1.08554	0.909042	0.874525	0.960074	0.898406	0.863677	0.855512	0.962813
	1900-01-02 16:00:00	0.980553	0.990572	1.0054	0.874152	1.03226	0.911012	0.9777	0.993354	0.88597	0.854125	0.838645	0.940646
	1900-01-02 17:00:00	0.984178	0.998457	1.01775	0.864228	0.994795	0.89764	1.00901	0.999039	0.937495	0.8726	0.833418	0.970923
	1900-01-02 18:00:00	0.983539	1.01265	1.01153	0.940584	1.06092	0.898193	0.993592	1.00337	0.95435	0.857431	0.845704	0.989656
	1900-01-02 19:00:00	0.985185	1.00562	0.969995	0.945445	1.05916	0.881669	1.01021	0.994394	0.982561	0.870223	0.847076	0.965033
	1900-01-02 20:00:00	0.989005	0.962064	0.92101	0.924031	0.970689	0.920627	0.997138	1.01971	0.989482	0.942969	0.901596	0.963593
	1900-01-02 21:00:00	0.910498	0.932544	0.89422	1.01899	1.05262	1.03729	0.962934	1.01765	0.986503	0.991874	0.99273	0.993823
	1900-01-02 22:00:00	0.909288	0.914174	0.920863	1.05005	1.0755	1.08408	0.99297	0.94427	0.927117	1.01959	1.02286	1.03646
	1900-01-02 23:00:00	0.858586	0.947626	0.922615	1.08067	1.07683	1.07145	1.00508	0.918639	0.874755	1.03128	1.02965	1.05242
	1900-01-03	0.883076	0.920615	0.921485	1.05959	1.09144	1.05865	0.983302	0.978859	0.916176	1.04894	1.02049	1.07881
	1900-01-03 01:00:00	0.945144	0.929374	0.983638	1.08396	1.12456	1.07792	1.00518	1.01198	0.943843	1.04867	1.04921	1.08931
	1900-01-03 02:00:00	0.946282	0.890289	0.993158	1.01741	1.12212	1.10961	0.995197	0.997471	0.976724	1.02271	1.02006	1.08756
	1900-01-03 03:00:00	0.899032	0.952612	1.01307	0.975394	1.14349	1.0924	0.996947	0.979116	0.9312	1.01346	1.03688	1.11826
	1900-01-03 04:00:00	0.964377	0.960039	0.973811	0.950578	1.12242	1.05709	1.02901	1.00116	0.940305	1.02275	1.05157	1.10828
	1900-01-03 05:00:00	0.928568	0.976244	1.00445	0.961922	1.14238	0.995165	0.966818	0.959022	0.890567	1.05164	1.04477	1.08996
	1900-01-03 06:00:00	0.943143	0.852373	0.884791	0.927717	1.15141	1.06008	0.924576	0.808698	0.894381	1.03117	1.01481	1.10262
	1900-01-03 07:00:00	0.991887	0.990747	0.93147	0.916169	1.14512	1.02723	1.00786	0.957951	0.966947	1.03647	0.993586	1.10472
Day 4	1900-01-03 08:00:00	1.00233	1.00505	0.913492	0.94119	1.08862	0.955054	1.05049	1.02484	1.031	0.996474	0.968147	1.09676
	1900-01-03 09:00:00	1.00225	0.994971	0.89143	0.943349	1.03191	0.920098	1.0708	1.0187	1.00775	0.997322	0.928227	1.02673
	1900-01-03 10:00:00	0.985714	0.984456	0.939518	0.908468	1.06021	0.88778	1.03987	0.999549	1.00619	1.01768	0.965527	1.02616
	1900-01-03 11:00:00	0.999588	0.986167	0.93235	0.883834	0.987852	0.876867	1.05775	1.01054	1.01241	0.996089	0.839548	0.975309
	1900-01-03 12:00:00	1.00722	0.97989	0.971086	0.83784	1.00706	0.857451	1.00766	0.988912	1.01434	0.931074	0.890281	0.996285
	1900-01-03 13:00:00	1.00924	0.986402	0.976158	0.909012	1.00398	0.884304	1.02212	0.990726	1.01274	0.906029	0.88064	1.00315
	1900-01-03 14:00:00	0.999638	0.983421	0.9669	0.884391	0.993785	0.864822	1.01859	1.00848	1.01896	0.906617	0.888886	1.00634
	1900-01-03 15:00:00	0.993505	0.982503	0.997893	0.870952	0.966147	0.885019	1.02636	1.01417	1.01401	0.883959	0.864983	0.987584
	1900-01-03 16:00:00	0.999832	1.00723	1.0092	0.867917	1.06357	0.888696	1.02549	1.02646	1.02186	0.870547	0.861431	0.948784
	1900-01-03 17:00:00	0.99304	1.01378	1.00379	0.860044	1.00913	0.876172	1.01771	1.02769	1.02918	0.882657	0.851844	0.925044
	1900-01-03 18:00:00	1.0198	1.02077	1.02105	0.894679	0.961112	0.88117	1.01759	1.02925	1.01898	0.896239	0.858141	0.894173
	1900-01-03 19:00:00	1.01359	1.02319	1.02055	0.891997	1.0004	0.861159	1.01269	1.02152	1.03849	0.871283	0.851315	0.848149
	1900-01-03 20:00:00	1.00943	1.00169	1.0513	1.02886	1.03267	1.00737	0.999941	1.05498	1.00658	0.876793	0.977071	0.946667
	1900-01-03 21:00:00	1.00811	0.998252	1.00884	1.04947	1.05771	1.03858	1.00764	1.04411	1.01205	0.904794	1.02473	0.990502
	1900-01-03 22:00:00	0.946669	0.941531	0.981656	1.07184	1.0593	1.05707	0.97474	1.02089	0.986317	0.838746	1.0408	1.03891
	1900-01-03 23:00:00	0.928337	0.964318	0.987785	1.08978	1.09762	1.07279	0.931077	0.990122	0.954969	1.00482	1.0576	1.05978
	1900-01-04	0.95339	0.973353	0.982581	1.0841	1.11587	1.0603	0.956433	0.959999	0.923034	1.02537	1.07676	1.06798
	1900-01-04 01:00:00	0.981168	0.961121	0.999895	1.08444	1.11378	1.06739	0.963291	0.954112	0.961476	1.04043	1.09114	1.06526
	1900-01-04 02:00:00	0.92266	0.881384	0.993975	1.09475	1.14022	1.0828	0.961763	0.921918	0.913227	1.05449	1.06965	1.09356
	1900-01-04 03:00:00	0.921401	0.95412	0.94014	1.06629	1.10733	1.06624	0.942785	0.8996	0.938268	1.02037	1.05313	1.04955
	1900-01-04 04:00:00	0.892447	0.960599	0.897252	1.07252	1.12932	1.08109	0.931678	0.883897	0.982312	1.03341	1.07173	1.06617
	1900-01-04 05:00:00	0.933275	0.928597	0.902332	1.05349	1.12822	1.08633	0.898309	0.880053	0.93052	1.05072	1.04884	1.07652
	1900-01-04 06:00:00	0.888108	0.905472	0.976854	1.04739	1.106	1.08627	0.895565	0.911943	0.93829	1.05091	1.06184	1.06105
	1900-01-04 07:00:00	0.970668	0.962578	0.963393	1.07655	1.14427	1.08031	0.979789	0.900385	0.979786	1.04254	1.04694	1.02339
Day 5	1900-01-04 08:00:00	0.926489	0.960449	0.979923	1.02363	1.05203	1.00456	0.945034	0.928849	0.939012	1.04194	0.988806	0.972621
	1900-01-04 09:00:00	0.934299	0.918729	0.974563	0.976685	1.07853	0.957767	0.936499	0.891813	0.905163	0.958133	0.905418	0.902841
	1900-01-04 10:00:00	0.96502	0.973009	0.987578	0.960599	1.03883	0.931153	0.910549	0.939607	1.001	0.952376	0.895682	0.83802
	1900-01-04 11:00:00	0.977225	0.995778	1.00869	0.910374	0.974471	0.917235	0.98374	0.920094	0.969603	0.89652	0.880782	0.903429
	1900-01-04 12:00:00	0.984068	0.960199	1.00417	0.884816	0.988196	0.888647	0.990566	0.926613	0.931202	0.854765	0.880749	0.90205
	1900-01-04 13:00:00	0.976383	0.994253	1.02713	0.882627	0.964418	0.874902	0.966547	1.00084	0.981494	0.851769	0.842275	0.892682
	1900-01-04 14:00:00	1.00011	1.00921	1.02796	0.863763	0.932173	0.888787	0.985089	1.02226	1.0298	0.82632	0.848584	0.852733
	1900-01-04 15:00:00	0.996565	1.01739	1.02839	0.854267	0.948332	0.88184	1.02561	1.01231	1.01958	0.839716	0.873886	0.857276
	1900-01-04 16:00:00	1.00368	1.02548	1.0455	0.897601	0.910421	0.869494	1.01641	1.04851	1.02697	0.855547	0.846495	0.842384
	1900-01-04 17:00:00	1.014	0.997077	1.0108	0.878429	0.89993	0.878024	0.979743	1.00307	1.03222	0.845483	0.852639	0.833726
	1900-01-04 18:00:00	1.00908	0.97437	1.00697	0.890727	0.934485	0.86435	0.963091	0.98232	1.02411	0.839784	0.848248	0.817885
	1900-01-04 19:00:00	0.987248	0.991329	0.970584	1.0073	0.967915	0.943848	0.950319	0.954964	0.989056	0.933387	0.930302	0.861945
	1900-01-04 20:00:00	0.958381	0.923059	0.883274	1.01029	0.994495	1.01064	0.905785	0.958611	0.978908	0.977163	0.98835	0.926347
	1900-01-04 21:00:00	0.908412	0.889964	0.876846	1.04068	1.0395	1.03689	0.889056	0.993361	0.951642	1.01939	1.03142	1.00723
	1900-01-04 22:00:00	0.949775	0.924585	0.925849	1.02622	1.03998	1.04175	0.962191	0.978274	0.912711	1.0351	1.03284	1.02159
	1900-01-04 23:00:00	0.980966	0.933325	0.984546	1.05691	1.07937	1.05558	0.960867	0.989468	1.0015	1.03787	1.06356	1.04391
	1900-01-05	1.02004	0.976045	1.05743	1.06468	1.11512	1.04482	1.01616	0.942304	0.971474	1.0421	1.08205	1.07206
	1900-01-05 01:00:00	0.995116	0.982534	1.05517	1.04458	1.10842	1.06822	0.999364	0.931054	0.945136	1.05835	1.07024	1.04228
	1900-01-05 02:00:00	0.981788	1.003	1.02777	1.00303	1.10563	1.06248	1.00364	0.933849	0.970571	1.06453	1.07384	1.0356
	1900-01-05 03:00:00	0.977425	0.946088	1.0381	1.00644	1.09602	1.05885	0.985753	0.945126	0.997812	1.05379	1.06543	1.02371
	1900-01-05 04:00:00	0.981966	1.01931	1.03044	0.937717	1.09343	1.05316	0.954754	0.954159	0.965419	1.04332	1.06728	0.991055
	1900-01-05 05:00:00	1.00422	0.986624	1.02557	0.995471	1.09372	1.06648	1.00031	0.984818	1.04419	1.04485	1.06957	1.00111
	1900-01-05 06:00:00	0.958747	0.971354	1.0651	0.97154	1.1049	1.07755	0.995785	0.987265	1.00962	1.05772	1.06599	0.988828
	1900-01-05 07:00:00	1.02209	0.991964	1.04271	0.926353	1.07264	1.07534	0.985559	0.944645	1.01197	1.0416	1.05502	0.937814
Day 6	1900-01-05 08:00:00	0.987066	0.956459	1.05137	0.963485	1.0609	1.05963	0.980601	0.924811	1.02464	1.03769	1.0122	0.926995
	1900-01-05 09:00:00	0.940603	0.941377	1.03224	0.88339	0.974446	0.91632	1.03251	0.903123	1.01495	0.941287	0.86695	0.8909
	1900-01-05 10:00:00	0.986262	0.960716	1.02118	0.951604	0.991939	0.921122	0.996437	0.969997	0.984494	0.902694	0.824392	0.877607
	1900-01-05 11:00:00	0.992334	0.994396	1.02151	0.988383	0.93164	0.902281	0.995495	1.00809	1.01414	0.892824	0.894084	0.885492
	1900-01-05 12:00:00	0.992109	0.998404	1.04252	0.961058	0.969813	0.886596	1.01153	1.02984	1.01236	0.903942	0.955046	0.891314
	1900-01-05 13:00:00	0.991868	1.02456	1.04322	0.90387	0.91216	0.905238	1.02477	1.0104	1.01718	0.882372	0.88691	0.873336
	1900-01-05 14:00:00	0.982992	0.982033	1.04493	1.01121	0.935281	0.8814	1.0159	1.00579	0.994609	0.877918	0.851283	0.867311
	1900-01-05 15:00:00	0.995289	0.989006	1.02535	0.990353	0.907806	0.887882	1.02233	1.01553	0.978523	0.879005	0.849686	0.854602
	1900-01-05 16:00:00	0.968159	0.978139	1.03312	1.01758	1.01394	0.889299	1.03094	1.03897	0.957261	0.84795	0.839351	0.855538
	1900-01-05 17:00:00	0.959465	0.951694	1.02106	1.01466	0.967523	0.882851	0.997822	0.999303	0.953088	0.866007	0.837655	0.840303
	1900-01-05 18:00:00	0.92025	0.959019	1.00019	1.01349	0.893641	0.883011	0.9483	0.933626	0.965435	0.854513	0.838522	0.851349
	1900-01-05 19:00:00	0.923771	0.954935	0.971907	0.953243	0.893835	0.889273	0.901803	0.955082	0.957974	0.862591	0.859512	0.833483
	1900-01-05 20:00:00	0.933893	0.964671	0.956226	1.01204	1.02741	1.03373	0.942596	0.963817	0.96261	0.994523	1.02526	0.994573
	1900-01-05 21:00:00	0.926373	0.975557	1.0031	1.04828	1.04848	1.05977	0.903563	0.939402	0.968404	1.03615	1.06172	1.03168
	1900-01-05 22:00:00	0.933377	0.957478	0.925867	1.06544	1.0684	1.05843	0.718786	0.867441	0.899376	1.05733	1.08237	1.04631
	1900-01-05 23:00:00	0.93438	0.911972	0.967256	1.08066	1.08299	1.0503	0.841883	0.884656	0.8955	1.06048	1.08226	1.0802
	1900-01-06	0.94982	0.903571	0.967448	1.04847	1.12315	1.07761	0.965176	0.891849	0.905897	1.06642	1.0686	1.04624
	1900-01-06 01:00:00	0.917618	0.851222	0.977408	1.05466	1.10284	1.08546	0.955957	0.872014	0.933417	1.08525	1.11836	1.05675
	1900-01-06 02:00:00	0.86174	0.875321	0.961566	1.01145	1.09114	1.08703	0.940276	0.898743	0.875967	1.06421	1.08936	1.07648
	1900-01-06 03:00:00	0.951858	0.882759	0.972963	0.960559	1.10665	1.08506	0.947645	0.888772	0.868074	1.07859	1.10384	1.0299
	1900-01-06 04:00:00	0.937276	0.851682	0.999659	0.97365	1.07527	1.06389	0.917397	0.926371	0.958268	1.05495	1.09473	1.02698
	1900-01-06 05:00:00	0.928274	0.921207	0.928645	0.948879	1.05121	1.02372	0.939296	0.932837	1.02328	1.03862	1.07775	1.03612
	1900-01-06 06:00:00	0.941829	0.935974	0.916748	0.976272	1.04901	1.04823	0.940158	0.924983	0.989158	1.00712	1.1051	1.02501
	1900-01-06 07:00:00	0.961664	0.929873	0.950524	0.949247	0.96366	1.04043	0.980496	0.879384	1.00297	1.00835	1.10479	0.977461
Day 7	1900-01-06 08:00:00	0.940994	0.937256	0.963604	0.937914	0.929673	1.0255	0.949619	0.948476	0.973604	0.975187	1.08225	0.915894
	1900-01-06 09:00:00	0.969484	0.992536	1.00849	0.937143	0.929375	0.988003	0.999383	1.00942	1.01612	0.964534	1.06137	0.958826
	1900-01-06 10:00:00	0.997232	1.00013	1.05439	0.965715	0.964336	0.953802	0.997457	1.01789	1.02058	0.902985	0.996717	0.866784
	1900-01-06 11:00:00	0.996891	1.01643	1.02169	0.925183	0.923931	0.916624	1.0188	1.0366	1.04118	0.878347	0.938093	0.873267
	1900-01-06 12:00:00	0.997544	1.01719	1.0302	0.93692	0.906304	0.890611	1.03264	1.00185	1.04193	0.86996	0.933457	0.883528
	1900-01-06 13:00:00	0.99776	1.02401	1.04016	0.884502	0.980741	0.877301	1.04093	0.983016	1.02139	0.854497	0.93612	0.893039
	1900-01-06 14:00:00	0.977383	0.969622	0.999415	0.873439	0.938323	0.891757	1.01415	0.946656	1.03343	0.896745	0.991455	0.870479
	1900-01-06 15:00:00	0.963989	0.974144	0.960026	0.857785	0.923119	0.891387	0.995798	0.970675	0.998448	0.873858	0.980761	0.879277
	1900-01-06 16:00:00	0.941669	0.977529	0.968757	0.900235	0.930211	0.892116	0.954623	0.972669	0.958954	0.862716	1.00145	0.869741
	1900-01-06 17:00:00	0.936449	0.935756	0.931232	0.885436	0.958301	0.883693	0.910195	0.951229	0.900136	0.859991	0.940986	0.85796
	1900-01-06 18:00:00	0.950585	0.966413	0.916	0.923905	0.919152	0.890268	0.971535	0.946558	0.925663	0.863201	0.934475	0.841332

## Sheet: Fig.2H
(H) Weight of eWAT for control mice and mice subjected to bilateral cast immobilization for the indicated times (n = 5–7 per group).
	eWAT (g)	BW (g)	% body weight
Control 1	0.342	24.5	1.39592
Control 2	0.37	24	1.54167
Control 3	0.304	24.6	1.23577
Control 4	0.208	28.69	0.724991
Control 5	0.238	27.38	0.869248
Control 6	0.401	26.84	1.49404
Imm (10 h) 1	0.143	26.1	0.547893
Imm (10 h) 2	0.301	25.3	1.18972
Imm (10 h) 3	0.207	26.3	0.787072
Imm (10 h) 4	0.158	30.2	0.523179
Imm (10 h) 5	0.279	26.21	1.06448
Imm (10 h) 6	0.335	27.25	1.22936
Imm (24 h) 1	0.149	24.02	0.620316
Imm (24 h) 2	0.241	24.33	0.990547
Imm (24 h) 3	0.13	24.46	0.53148
Imm (24 h) 4	0.202	23.56	0.857385
Imm (24 h) 5	0.256	25.55	1.00196
Imm (24 h) 6	0.272	24.67	1.10255
Imm (day 3) 1	0.196	26.31	0.744964
Imm (day 3) 2	0.184	26.13	0.704171
Imm (day 3) 3	0.288	25.81	1.11585
Imm (day 3) 4	0.244	24.1	1.01245
Imm (day 3) 5	0.171	25.27	0.676692
Imm (day 5) 1	0.185	26.9	0.687732
Imm (day 5) 2	0.198	25.24	0.784469
Imm (day 5) 3	0.099	25.65	0.385965
Imm (day 5) 4	0.123	25.56	0.481221
Imm (day 5) 5	0.158	27.57	0.573087
Imm (day 7) 1	0.117	21	0.557143
Imm (day 7) 2	0.186	22.2	0.837838
Imm (day 7) 3	0.17	21.5	0.790698
Imm (day 7) 4	0.218	26.26	0.83016
Imm (day 7) 5	0.235	25.71	0.914041
Imm (day 7) 6	0.142	24.92	0.569823
Imm (day 7) 7	0.155	26.39	0.587344

## Sheet: Fig.2I
(I) Hepatic glycogen content for control mice and mice subjected to bilateral cast immobilization for the indicated times (n = 6–10 per group).
First measurement								Second measurement
	Abs.1	Abs.-Blank	conc. (μg/ml)	tissue weight (mg)	Adjustment (10μl)	Glycogen(μg/mg)			Abs.1	Adjusted by first data	Abs.-Blank	conc. (μg/ml)	*dil	tissue weight (mg)	Adjustment (10μl)	Glycogen(μg/mg)
Control 1	1.032	0.981	264.811	12	0.12	2206.76		Control 3	0.589	0.520441	0.469441	131.289	262.578	8	0.08	3282.23
Control 2	0.945	0.894	241.297	10	0.1	2412.97		Control 4	0.525	0.46389	0.41289	115.581	231.161	8	0.08	2889.52
Control 3	Raw data is shown on the right table.			8	0.08	3282.23		Control 5	0.447	0.394969	0.343969	96.4359	192.872	10.7	0.107	1802.54
Control 4				8	0.08	2889.52		Imm (day 7) 4	0.357	0.315445	0.264445	74.3459	148.692	7.5	0.075	1982.56
Control 5				10.7	0.107	1802.54		Imm (day 7) 5	0.422	0.372879	0.321879	90.2998	180.6	12	0.12	1505
Control 6	0.837	0.786	212.108	13	0.13	1631.6		Imm (day 7) 6	0.271	0.239456	0.188456	53.2377	106.475	14.5	0.145	734.313
Control 7	1.278	1.227	331.297	10	0.1	3312.97
Control 8	1.047	0.996	268.865	13	0.13	2068.19			First measurement (Abs.)	Second measurement (Abs.)	Second / First	Correction value
Control 9	1.151	1.1	296.973	13	0.13	2284.41		G4	0.188	0.222	0.846847	0.8836
Control 10	1.161	1.11	299.676	14	0.14	2140.54		G5	0.104	0.113	0.920354
Imm (24 h) 1	0.766	0.715	192.919	10	0.1	1929.19
Imm (24 h) 2	0.596	0.545	146.973	10	0.1	1469.73
Imm (24 h) 3	0.96	0.909	245.351	14	0.14	1752.51
Imm (24 h) 4	0.883	0.832	224.541	16	0.16	1403.38
Imm (24 h) 5	0.895	0.844	227.784	14	0.14	1627.03
Imm (24 h) 6	0.832	0.781	210.757	15	0.15	1405.05
Imm (day 3) 1	0.734	0.683	184.27	14	0.14	1316.22
Imm (day 3) 2	0.865	0.814	219.676	14	0.14	1569.11
Imm (day 3) 3	0.913	0.862	232.649	13	0.13	1789.6
Imm (day 3) 4	0.144	0.093	24.8108	14	0.14	177.22
Imm (day 3) 5	0.469	0.418	112.649	14	0.14	804.633
Imm (day 3) 6	0.196	0.145	38.8649	14	0.14	277.606
Imm (day 5) 1	0.954	0.903	243.73	16	0.16	1523.31
Imm (day 5) 2	0.126	0.075	19.9459	13	0.13	153.43
Imm (day 5) 3	0.659	0.608	164	14	0.14	1171.43
Imm (day 5) 4	0.539	0.488	131.568	15	0.15	877.117
Imm (day 5) 5	0.151	0.1	26.7027	15	0.15	178.018
Imm (day 5) 6	0.32	0.269	72.3784	13	0.13	556.757
Imm (day 7) 1	0.261	0.21	56.4324	16	0.16	352.703
Imm (day 7) 2	0.125	0.074	19.6757	13	0.13	151.351
Imm (day 7) 3	0.094	0.043	11.2973	16	0.16	70.6081
Imm (day 7) 4	Raw data is shown on the right table.			7.5	0.075	1982.56
Imm (day 7) 5				12	0.12	1505
Imm (day 7) 6				14.5	0.145	734.313

## Sheet: S1A
(A) Pathway analysis of metabolites upregulated in iBAT by cast immobilization for 10 h.
n mol/g tissue weght	Control 1	Control 2	Control 3	Imm (10 h) 1	Imm (10 h) 2	Imm (10 h) 3		Principal component loadings
Gly	905.349	1119.37	943.31	1095.86	1316.18	1078.88		Metabolites	PC1
β-Ala	17.366	20.6466	15.7932	27.5373	26.6311	22.922		Glycerol 3-phosphate	-0.584843
Ala	1595.11	1903.52	1451.44	1798.92	2071.92	1831.08		Glyceraldehyde 3-phosphate	-0.533503
GABA	245.916	337.59	284.711	368.871	301.777	273.553		Ribose 5-phosphate	-0.493605
Choline	623.499	579.311	657.076	760.585	1025.47	842.859		Tyramine	-0.444083
Ser	632.743	775.383	552.828	602.975	755.896	686.228		Adenosine	-0.333441
Creatinine	11.5567	10.2579	10.7011	7.88131	15.2029	8.65447		NAD+	-0.305679
Pro	213.014	229.385	173.453	185.334	257.878	238.809		2-Oxoisovaleric acid	-0.200359
Val	327.168	341.157	313.087	344.894	427.341	370.433		Citrulline	-0.0809135
Betaine	391.428	456.764	346.195	652.489	651.76	666.829		AMP	0.0189971
Thr	353.004	459.089	364.47	416.205	484.853	442.086		NADP+	0.0859308
Betaine aldehyde_+H2O	107.245	111.513	117.85	163.123	175.646	165.561		Glutathione (GSH)	0.0997442
Thymine	46.7258	38.14	46.4036	63.9318	72.7939	60.2861		Cytidine	0.286021
Hydroxyproline	16.9878	25.2079	22.5649	31.9722	30.8914	28.9776		2-Phosphoglyceric acid	0.287479
Creatine	1544.07	2004.28	2548.12	3100.32	2703.86	2450.05		Adenine	0.327327
Ile	138.383	162.385	118.605	137.516	205.809	172.015		Gln	0.342987
Leu	358.325	397.814	328.939	340.976	505.585	425.446		Creatinine	0.348896
Asn	121.867	148.855	120.025	129.372	167.502	136.067		ADP	0.363254
Ornithine	13.6695	32.1015	18.1793	89.0701	29.4501	30.6332		Ornithine	0.384265
Asp	240.49	248.496	207.522	257.177	314.655	316.074		Citric acid	0.389961
Adenine	2.41779	3.94017	2.12661	2.14987	2.9441	2.74375		GABA	0.402678
Hypoxanthine	493.492	592.901	424.322	530.197	654.968	499.968		Uridine	0.447664
Anthranilic acid	15.6689	18.6129	14.146	16.0741	21.5717	16.0411		CoA_divalent	0.451407
Tyramine	5.8156	6.74413	7.42454	6.74062	5.88082	6.19559		Sedoheptulose 7-phosphate	0.464485
Spermidine	4.01113	7.05149	3.96805	7.35083	11.7387	7.15605		GMP	0.515747
Gln	1554.58	2641.31	1490.81	1922.6	1797.34	2003.48		Glutathione (GSSG)_divalent	0.530042
Lys	419.663	447.336	433.41	489.015	603.491	540.513		Dihydroxyacetone phosphate	0.590681
Glu	683.592	725.304	672.636	791.929	835.778	808.38		Arg	0.645624
Met	127.88	135.019	121.264	113.178	154.738	132.469		Malic acid	0.650783
His	142.439	170.293	133.19	159.007	183.676	176.766		Creatine	0.696426
Phe	179.506	208.95	170.592	176.928	254.058	224.587		Ser	0.707869
Arg	302.679	316.8	288.161	220.201	399.319	346.826		Carnosine	0.709426
Citrulline	41.9823	71.4874	46.1205	45.4817	46.5289	37.896		CMP	0.725844
Tyr	153.125	177.038	136.377	153.896	196.747	176.711		Met	0.743464
Trp	39.0642	46.4629	38.9579	42.3516	52.8236	51.8119		Guanosine	0.759033
Carnosine	10.5355	9.55765	19.2715	26.4036	26.4365	15.5541		Glucose 1-phosphate	0.767666
Cytidine	11.6693	20.4699	16.3176	16.5575	14.1067	20.3491		cAMP	0.785075
Uridine	147.774	148.273	146.564	182.042	169.963	133.843		Pro	0.81791
Adenosine	5.68818	7.02249	6.27755	5.82545	5.62503	5.87841		Fructose 1,6-diphosphate	0.82074
Inosine	162.324	189.561	116.915	166.581	251.296	165.43		UMP	0.834115
Guanosine	3.60485	3.95384	3.2733	3.01722	4.48032	4.50918		IMP	0.865394
Glutathione (GSSG)_divalent	207.176	347.192	247.017	357.923	271.353	309.009		Fructose 6-phosphate	0.878131
Glutathione (GSH)	24.6177	56.8462	61.9532	174.762	19.4474	85.3231		Hypoxanthine	0.882094
S-Adenosylmethionine	3.54675	4.77189	3.81954	5.94074	5.60464	7.17531		Anthranilic acid	0.898441
Lactic acid	47395.7	65230.1	62862.2	70331	91306.4	70424.6		Glucose 6-phosphate	0.90665
3-Hydroxybutyric acid	1403.71	1596.81	1454.04	1728.64	1957.72	2082.85		S-Adenosylmethionine	0.932833
2-Hydroxybutyric acid	51.22	81.9523	103.43	109.116	142.184	105.235		Inosine	0.935806
2-Oxoisovaleric acid	91.5328	66.6476	93.1718	73.483	90.8845	80.5945		Gluconic acid	0.951303
Malic acid	547.897	423.111	886.177	1050.27	970.39	986.281		Thymine	0.963475
Glyceraldehyde 3-phosphate	224.414	263.443	216.099	347.297	116.324	92.2375		ATP	0.973453
Dihydroxyacetone phosphate			4968.94	9251.91	5510.71	5959.6		3-Phosphoglyceric acid	0.980317
Glycerol 3-phosphate	189.268	168.234	67.4726	151.824	66.9049	84.3126		Asn	0.986332
2-Phosphoglyceric acid	130.766	103.403	38.0555	164.227	93.3279	143.664		2-Hydroxybutyric acid	0.991215
3-Phosphoglyceric acid	150.862	146.42	171.385	220.434	303.693	182.885		Tyr	0.997513
Citric acid	608.886	538.012	1600.01	1208.91	1357.29	1230.95		Leu	0.998504
Gluconic acid	199.528	221.005	227.917	382.417	356.03	300.85		6-Phosphogluconic acid	1.00509
Ribose 5-phosphate	205.049	38.737	105.87	133.073	100.007	101.715		beta-Ala	1.01804
Ribulose 5-phosphate		344.524	284.35	456.561	532.179	430.053		Phe	1.02299
Glucose 6-phosphate	1103.2	1227.82	1834.75	1721.48	2345.18	1880.7		Hydroxyproline	1.03467
Fructose 6-phosphate	334.609	299.625	494.485	473.433	660.719	530.063		Ile	1.03566
Glucose 1-phosphate	204.166	192.196	278.365	328.733	332.19	272.969		Asp	1.05172
6-Phosphogluconic acid	200.509	190.227	196.958	256.066	274.396	283.362		Choline	1.05625
Sedoheptulose 7-phosphate	51.4532	57.7987	91.1449	70.0892	86.9781	71.8551		Betaine	1.05646
CMP	160.703	253.583	167.248	208.767	212.954	231.745		Ala	1.05703
UMP	443.397	688.566	532.448	710.742	637.404	758.207		Thr	1.068
cAMP	4.60623	7.77513	5.06149	4.48509	7.9081	6.73667		Betaine aldehyde_+H2O	1.068
Fructose 1,6-diphosphate	416.969	186.51	302.622	906.896	836.012	609.607		3-Hydroxybutyric acid	1.07642
AMP	2540.11	4217.36	3220.19	4052.76	2689.57	3219.04		Ribulose 5-phosphate	1.07705
IMP	7179.19	9932.8	9898.58	11554.8	10733.6	11472.1		Trp	1.08052
GMP	987.712	1669.88	1138.98	1245.16	1261.74	1563.83		His	1.08144
CoA_divalent	84.3684	205.347	240.778	428.652	207.359	282.059		GDP	1.10005
ADP	274.525	441.868	183.109	194.64	346.785	276.502		Val	1.11215
GDP	101.302	146.66	105.396	148.379	160.235	150.925		Lactic acid	1.11569
ATP	33.6141	25.9522	37.8981	55.8745	65.7714	53.8598		Gly	1.11909
GTP		31.2546	46.7206	70.7629	70.5148	60.8379		Spermidine	1.1423
NAD+	26.8343	40.4329	41.3901	29.2811	32.8408	21.8789		Glu	1.15023
NADP+	40.893	50.0442	46.764	62.0303	46.8331	35.5529		Lys	1.1527

## Sheet: S1B-C
(B and C) Oxygen consumption rate (VO2) and RER, respectively, for mice with denervated iBAT subjected (or not) to bilateral cast immobilization for 7 days (n = 3 per group).
Oxygen consumption									RER
		Control 1	Control 2	Control 3	Imm 1	Imm 2	Imm 3				Control 1	Control 2	Control 3	Imm 1	Imm 2	Imm 3
Day1	12:00:00	66.1438	64.8851	71.7924	58.4513	65.9026	79.8777		Day1	12:00:00	0.874287	0.864443	0.874417	0.815487	0.826346	0.80731
	13:00:00	54.101	47.2211	61.2811	52.1223	56.7875	72.7365			13:00:00	0.900982	0.841621	0.883199	0.826123	0.803815	0.807645
	14:00:00	51.062	49.4371	50.5993	43.5605	53.7398	62.7057			14:00:00	0.90399	0.87127	0.887752	0.808703	0.779861	0.790558
	15:00:00	45.2552	42.7316	51.7008	46.3405	48.1588	66.062			15:00:00	0.919609	0.889292	0.900104	0.831335	0.773844	0.804171
	16:00:00	46.2374	46.9439	50.1797	42.5895	50.1271	54.871			16:00:00	0.919793	0.885829	0.883515	0.809609	0.812442	0.79058
	17:00:00	51.5828	43.3215	49.9804	42.6172	44.2572	55.3942			17:00:00	0.91277	0.879368	0.882165	0.797752	0.78131	0.796803
	18:00:00	48.7058	43.8195	50.7321	47.8978	48.9667	48.2913			18:00:00	0.909761	0.847966	0.881046	0.815319	0.811668	0.816845
	19:00:00	46.7496	46.6681	50.625	45.379	45.1574	55.2487			19:00:00	0.88843	0.852819	0.890345	0.804253	0.798809	0.783108
	20:00:00	58.0883	53.1371	66.5196	48.5826	51.4135	54.8058			20:00:00	0.893279	0.853322	0.885446	0.820596	0.814199	0.747733
	21:00:00	61.8979	64.085	72.8648	53.6519	50.7722	55.4243			21:00:00	0.900587	0.851829	0.877282	0.856714	0.838149	0.752474
	22:00:00	62.1669	60.4005	54.8411	54.3047	55.6109	56.7215			22:00:00	0.909203	0.877881	0.883653	0.87485	0.878963	0.777304
	23:00:00	62.5858	62.7079	73.562	53.7652	52.9753	65.0209			23:00:00	0.92121	0.896844	0.886014	0.876747	0.885667	0.810799
	1900-01-01	56.7919	62.311	55.9801	58.7366	47.7855	55.191			1900-01-01	0.938128	0.894471	0.871071	0.876289	0.882117	0.806817
	1900-01-01 01:00:00	59.7971	58.3781	75.7479	56.7902	55.6207	66.1503			1900-01-01 01:00:00	0.926975	0.894732	0.872345	0.854966	0.869069	0.792598
	1900-01-01 02:00:00	53.957	60.0846	60.3853	44.8815	45.4176	53.8131			1900-01-01 02:00:00	0.926981	0.893223	0.868046	0.851235	0.883835	0.761173
	1900-01-01 03:00:00	50.2247	58.6516	51.6923	47.6179	46.3699	67.5774			1900-01-01 03:00:00	0.921342	0.867467	0.82107	0.841437	0.832106	0.775086
	1900-01-01 04:00:00	52.726	54.1166	56.7599	48.3673	44.284	51.1566			1900-01-01 04:00:00	0.887586	0.835356	0.827638	0.835335	0.797948	0.775846
	1900-01-01 05:00:00	54.6792	56.2322	59.0115	49.6473	49.1041	49.5566			1900-01-01 05:00:00	0.858344	0.850149	0.838511	0.835045	0.845072	0.756974
	1900-01-01 06:00:00	54.6486	56.5313	69.525	59.0856	54.708	74.9036			1900-01-01 06:00:00	0.856237	0.876365	0.860733	0.843862	0.862196	0.760263
	1900-01-01 07:00:00	53.7421	58.6252	65.422	52.6829	54.9282	73.9598			1900-01-01 07:00:00	0.860951	0.864661	0.872779	0.84077	0.856356	0.744647
Day2	1900-01-01 08:00:00	58.2668	60.0479	61.5851	55.7881	41.7622	71.4058		Day2	1900-01-01 08:00:00	0.850785	0.859561	0.858739	0.850353	0.820412	0.749003
	1900-01-01 09:00:00	46.9143	41.816	50.4564	46.0281	45.9161	58.1411			1900-01-01 09:00:00	0.820217	0.828816	0.806241	0.845792	0.800513	0.765386
	1900-01-01 10:00:00	46.9993	46.5201	56.9475	39.3579	43.6689	41.7824			1900-01-01 10:00:00	0.853798	0.847467	0.86408	0.832974	0.800913	0.747652
	1900-01-01 11:00:00	44.1555	46.5696	45.9544	45.4787	36.2909	56.1017			1900-01-01 11:00:00	0.853193	0.852529	0.87698	0.793158	0.775209	0.783459
	1900-01-01 12:00:00	45.1673	41.8494	43.8791	46.3438	40.5928	42.57			1900-01-01 12:00:00	0.835429	0.859735	0.838258	0.800149	0.763984	0.769714
	1900-01-01 13:00:00	48.0987	49.5457	48.3516	39.0803	44.4743	44.2517			1900-01-01 13:00:00	0.869043	0.86049	0.860669	0.805154	0.784543	0.781881
	1900-01-01 14:00:00	41.2368	41.9462	43.2423	51.8508	41.1491	58.6879			1900-01-01 14:00:00	0.880562	0.855806	0.849324	0.831312	0.829324	0.824124
	1900-01-01 15:00:00	42.3579	41.4388	46.8906	40.9812	43.6831	45.4696			1900-01-01 15:00:00	0.867381	0.86223	0.865987	0.804344	0.818353	0.830505
	1900-01-01 16:00:00	45.7217	41.7032	46.3533	40.1094	46.5673	47.2578			1900-01-01 16:00:00	0.866968	0.847181	0.857052	0.793452	0.868366	0.817626
	1900-01-01 17:00:00	43.3333	38.5788	43.6449	40.055	43.4195	47.8582			1900-01-01 17:00:00	0.87299	0.850769	0.875125	0.774312	0.863134	0.85243
	1900-01-01 18:00:00	46.7762	43.7027	51.7193	40.061	43.626	57.0907			1900-01-01 18:00:00	0.882457	0.858418	0.880985	0.772764	0.860918	0.811159
	1900-01-01 19:00:00	47.1036	43.4239	51.9365	47.8525	44.5428	55.6266			1900-01-01 19:00:00	0.882311	0.892439	0.915152	0.822841	0.865874	0.870731
	1900-01-01 20:00:00	57.9923	53.3756	63.601	47.8334	52.3173	44.1137			1900-01-01 20:00:00	0.906705	0.909531	0.929339	0.815753	0.878171	0.842973
	1900-01-01 21:00:00	64.7927	61.5034	70.7394	55.6776	49.1476	69.216			1900-01-01 21:00:00	0.915755	0.924817	0.922073	0.901091	0.89519	0.859716
	1900-01-01 22:00:00	59.6943	60.4594	58.8804	67.1062	55.4025	51.4944			1900-01-01 22:00:00	0.935276	0.934623	0.932322	0.9012	0.898858	0.900838
	1900-01-01 23:00:00	57.2218	61.1038	63.0528	61.1612	54.1566	53.9501			1900-01-01 23:00:00	0.945353	0.9361	0.935297	0.908184	0.915188	0.914051
	1900-01-02	61.5687	61.8082	61.6451	61.1254	50.9734	50.2029			1900-01-02	0.949542	0.946449	0.962763	0.919849	0.908167	0.922023
	1900-01-02 01:00:00	55.9542	59.0543	63.0466	59.6255	49.2053	57.1246			1900-01-02 01:00:00	0.946158	0.964116	0.929094	0.928611	0.908254	0.927884
	1900-01-02 02:00:00	54.648	56.999	56.7288	57.9681	47.8883	51.0518			1900-01-02 02:00:00	0.951074	0.958041	0.907516	0.924559	0.910624	0.935097
	1900-01-02 03:00:00	55.8426	52.5792	58.2747	58.3825	45.9911	46.3642			1900-01-02 03:00:00	0.958415	0.942885	0.877293	0.913933	0.904256	0.939364
	1900-01-02 04:00:00	55.5213	52.611	58.5048	50.1587	46.2268	57.5837			1900-01-02 04:00:00	0.94484	0.944855	0.851487	0.880816	0.855362	0.915134
	1900-01-02 05:00:00	54.3388	56.5468	58.8507	55.4396	47.644	48.3695			1900-01-02 05:00:00	0.921677	0.92311	0.854525	0.87429	0.918503	0.926874
	1900-01-02 06:00:00	60.0572	58.7717	61.4517	61.2565	47.1972	47.644			1900-01-02 06:00:00	0.89226	0.932352	0.861362	0.859228	0.877937	0.934528
	1900-01-02 07:00:00	52.0561	51.0453	65.1083	59.2644	46.7881	57.4539			1900-01-02 07:00:00	0.905266	0.948423	0.897534	0.906341	0.884149	0.918196
	1900-01-02 08:00:00	59.3668	62.3547	61.988	58.5139	44.1888	58.7435		Day3	1900-01-02 08:00:00	0.900345	0.912421	0.901712	0.897232	0.86082	0.929829
Day3	1900-01-02 09:00:00	48.3839	49.436	50.0324	46.5039	44.6259	48.027			1900-01-02 09:00:00	0.852883	0.87557	0.855774	0.89912	0.844071	0.937543
	1900-01-02 10:00:00	62.0836	62.6592	60.3755	60.1067	51.5356	58.7379			1900-01-02 10:00:00	0.874792	0.893754	0.910208	0.876563	0.834775	0.944527
	1900-01-02 11:00:00	54.5872	49.1637	52.895	43.9438	50.8342	48.8387			1900-01-02 11:00:00	0.863305	0.875788	0.885506	0.819256	0.812847	0.922621
	1900-01-02 12:00:00	45.9033	43.9796	48.1831	49.5449	44.6138	50.1647			1900-01-02 12:00:00	0.882912	0.891934	0.895392	0.843739	0.817315	0.897351
	1900-01-02 13:00:00	45.7075	45.8943	46.8702	42.5912	53.5243	52.3053			1900-01-02 13:00:00	0.902018	0.865486	0.88635	0.85062	0.835322	0.897796
	1900-01-02 14:00:00	46.3996	48.1266	53.9184	53.4863	59.8344	46.3889			1900-01-02 14:00:00	0.90602	0.888405	0.885826	0.865421	0.847984	0.941588
	1900-01-02 15:00:00	54.7447	42.5637	45.378	42.0278	48.1247	57.1504			1900-01-02 15:00:00	0.896351	0.887889	0.868344	0.854192	0.898271	0.928079
	1900-01-02 16:00:00	46.6866	44.9692	46.7535	49.9972	48.9323	46.2663			1900-01-02 16:00:00	0.907831	0.893159	0.891103	0.851824	0.880175	0.960055
	1900-01-02 17:00:00	51.2944	46.1312	47.69	42.5471	51.7817	47.8529			1900-01-02 17:00:00	0.926949	0.881357	0.895244	0.864602	0.880371	0.912522
	1900-01-02 18:00:00	49.0423	46.8789	54.0372	43.1098	52.9033	50.1729			1900-01-02 18:00:00	0.927228	0.88232	0.893376	0.845023	0.895463	0.928914
	1900-01-02 19:00:00	50.6127	43.4738	50.9167	51.4124	53.0431	58.5852			1900-01-02 19:00:00	0.912538	0.884278	0.894828	0.879094	0.907135	0.946105
	1900-01-02 20:00:00	61.4055	57.428	62.9915	57.0036	58.9304	60.1209			1900-01-02 20:00:00	0.907789	0.89204	0.914729	0.886731	0.915463	0.953317
	1900-01-02 21:00:00	63.7932	63.3508	68.384	63.5648	65.5493	58.3631			1900-01-02 21:00:00	0.928222	0.925862	0.924204	0.916316	0.918999	0.962773
	1900-01-02 22:00:00	67.349	59.1259	63.4209	64.0422	63.602	57.7624			1900-01-02 22:00:00	0.939545	0.944545	0.940851	0.934655	0.933781	0.961555
	1900-01-02 23:00:00	63.7536	58.6883	59.1357	70.9305	68.1842	61.8714			1900-01-02 23:00:00	0.950548	0.957034	0.941456	0.938634	0.945822	0.96612
	1900-01-03	59.9772	62.23	70.7128	66.1055	60.7014	56.5035			1900-01-03	0.961059	0.955845	0.934623	0.943977	0.954031	0.964202
	1900-01-03 01:00:00	65.6358	59.0127	59.9279	72.221	59.7977	55.2197			1900-01-03 01:00:00	0.945018	0.957107	0.925357	0.938234	0.950283	0.969282
	1900-01-03 02:00:00	58.0023	58.7733	53.2915	64.1638	69.6047	57.5363			1900-01-03 02:00:00	0.918956	0.953686	0.863325	0.950617	0.954702	0.965564
	1900-01-03 03:00:00	57.8682	60.5151	57.0372	59.8831	64.6438	60.0766			1900-01-03 03:00:00	0.895195	0.935664	0.868975	0.939279	0.942629	0.940896
	1900-01-03 04:00:00	58.2983	52.2037	57.2044	62.0989	56.2782	50.8618			1900-01-03 04:00:00	0.877105	0.895547	0.888159	0.95176	0.959664	0.957337
	1900-01-03 05:00:00	55.8425	54.3464	59.2327	57.3107	59.4951	54.4082			1900-01-03 05:00:00	0.873755	0.881874	0.906307	0.950018	0.960093	0.932791
	1900-01-03 06:00:00	62.0436	56.4313	62.8661	59.1388	63.1204	49.6489			1900-01-03 06:00:00	0.862431	0.903327	0.897477	0.956635	0.95644	0.932955
	1900-01-03 07:00:00	62.1643	51.7532	66.1954	60.0446	64.2323	56.8383			1900-01-03 07:00:00	0.874406	0.924133	0.921124	0.958182	0.956854	0.933537
	1900-01-03 08:00:00	59.3998	62.5709	57.5709	51.9343	64.181	58.5107		Day4	1900-01-03 08:00:00	0.860812	0.904481	0.916585	0.954566	0.931648	0.950594
	1900-01-03 09:00:00	48.5567	45.1728	48.0834	45.9993	59.8186	63.0063			1900-01-03 09:00:00	0.833484	0.885149	0.886331	0.938045	0.905169	0.955362
Day4	1900-01-03 10:00:00	50.7998	48.6497	51.416	46.7443	49.0727	62.9566			1900-01-03 10:00:00	0.850244	0.898461	0.842187	0.897882	0.891043	0.970162
	1900-01-03 11:00:00	45.4533	44.1817	51.7099	50.312	52.7006	50.7499			1900-01-03 11:00:00	0.841529	0.904123	0.892793	0.896972	0.89444	0.950886
	1900-01-03 12:00:00	45.9989	49.6156	46.1941	46.6685	52.9138	53.8424			1900-01-03 12:00:00	0.861964	0.890175	0.858259	0.902982	0.896339	0.955653
	1900-01-03 13:00:00	48.9782	40.8431	45.206	46.9405	57.6172	50.135			1900-01-03 13:00:00	0.845746	0.868587	0.831368	0.897384	0.930362	0.921841
	1900-01-03 14:00:00	45.9127	43.0999	45.0717	44.1129	49.3585	52.2517			1900-01-03 14:00:00	0.844082	0.851845	0.812798	0.885599	0.952659	0.90807
	1900-01-03 15:00:00	44.8469	40.589	55.4919	45.6295	61.8909	55.1509			1900-01-03 15:00:00	0.863196	0.869301	0.827924	0.911558	0.906094	0.926624
	1900-01-03 16:00:00	60.8178	47.8419	44.87	46.4733	53.0923	55.0177			1900-01-03 16:00:00	0.873064	0.872464	0.842243	0.892055	0.925871	0.931418
	1900-01-03 17:00:00	45.3739	44.0788	45.4635	42.4927	48.8062	46.7195			1900-01-03 17:00:00	0.845623	0.85904	0.8573	0.89576	0.92239	0.901276
	1900-01-03 18:00:00	47.2964	45.4148	55.6157	48.6263	51.8783	56.914			1900-01-03 18:00:00	0.85108	0.910929	0.875139	0.928673	0.930591	0.907493
	1900-01-03 19:00:00	49.7184	44.1436	54.7498	47.4159	62.9703	53.7522			1900-01-03 19:00:00	0.870158	0.89537	0.909668	0.943702	0.926379	0.925808
	1900-01-03 20:00:00	57.3011	58.9899	67.5775	57.9785	66.5502	58.4244			1900-01-03 20:00:00	0.862281	0.901299	0.904512	0.926589	0.928811	0.955274
	1900-01-03 21:00:00	69.9791	63.1547	72.8124	66.9328	77.2951	65.9748			1900-01-03 21:00:00	0.899171	0.919912	0.907703	0.932571	0.928915	0.954933
	1900-01-03 22:00:00	63.4342	62.0174	60.6036	67.3227	78.3942	57.6448			1900-01-03 22:00:00	0.923532	0.939136	0.927559	0.942666	0.934034	0.958496
	1900-01-03 23:00:00	61.147	64.0692	62.1876	71.8133	77.9338	62.7506			1900-01-03 23:00:00	0.931874	0.943238	0.926912	0.945389	0.929229	0.954022
	1900-01-04	60.1778	59.916	68.7902	70.5968	77.4422	59.8593			1900-01-04	0.935556	0.94823	0.920067	0.948307	0.940639	0.964145
	1900-01-04 01:00:00	70.097	58.2928	63.416	74.1567	73.0212	67.1143			1900-01-04 01:00:00	0.917349	0.947895	0.913214	0.949907	0.946488	0.944124
	1900-01-04 02:00:00	51.1743	57.5834	60.0463	64.1236	79.157	59.8703			1900-01-04 02:00:00	0.876257	0.941669	0.916903	0.967971	0.933518	0.953194
	1900-01-04 03:00:00	55.0551	58.1541	62.6773	64.7921	74.9953	53.9659			1900-01-04 03:00:00	0.870584	0.937685	0.906801	0.959569	0.931361	0.957114
	1900-01-04 04:00:00	56.6176	52.1688	59.8918	63.7402	70.9766	51.6601			1900-01-04 04:00:00	0.868706	0.890849	0.871825	0.949995	0.913492	0.884969
	1900-01-04 05:00:00	57.2743	55.3316	66.5308	63.0646	73.3134	57.0083			1900-01-04 05:00:00	0.883623	0.889627	0.897984	0.9468	0.923158	0.896019
	1900-01-04 06:00:00	63.3183	63.8387	68.3681	67.3485	72.8481	60.7776			1900-01-04 06:00:00	0.881716	0.90353	0.905346	0.94376	0.935289	0.896142
	1900-01-04 07:00:00	54.4643	51.1359	62.7259	63.8527	75.8322	61.4364			1900-01-04 07:00:00	0.889624	0.909511	0.914871	0.952357	0.919525	0.932677
	1900-01-04 08:00:00	51.4127	52.7652	58.1774	53.5508	67.6221	58.3468		Day5	1900-01-04 08:00:00	0.874664	0.89653	0.913432	0.937486	0.903473	0.94362
	1900-01-04 09:00:00	48.4589	47.7358	48.4719	55.4318	59.1466	53.6734			1900-01-04 09:00:00	0.865896	0.900922	0.861328	0.888291	0.887881	0.912904
	1900-01-04 10:00:00	48.0505	46.9024	49.835	50.2536	62.2191	54.5247			1900-01-04 10:00:00	0.838543	0.890246	0.829977	0.90351	0.892387	0.893231
Day5	1900-01-04 11:00:00	53.7211	47.6639	48.6525	54.3512	55.7976	56.7385			1900-01-04 11:00:00	0.828356	0.872933	0.829917	0.892218	0.873637	0.906872
	1900-01-04 12:00:00	45.369	42.4394	50.6291	42.4356	58.1298	52.7968			1900-01-04 12:00:00	0.841281	0.83859	0.820021	0.858615	0.864136	0.881787
	1900-01-04 13:00:00	44.7668	48.5171	46.8557	48.8491	54.6183	49.6557			1900-01-04 13:00:00	0.821537	0.876948	0.846747	0.881825	0.863114	0.872055
	1900-01-04 14:00:00	45.7503	44.8444	48.2401	55.6047	50.4773	48.9537			1900-01-04 14:00:00	0.803367	0.87774	0.824531	0.904228	0.830586	0.825885
	1900-01-04 15:00:00	55.7666	43.2635	51.0768	45.2967	60.8755	56.1627			1900-01-04 15:00:00	0.869903	0.911588	0.861661	0.950987	0.876206	0.828897
	1900-01-04 16:00:00	49.8709	45.017	52.0031	46.5643	56.9391	63.657			1900-01-04 16:00:00	0.890267	0.905375	0.887184	0.932481	0.884981	0.905194
	1900-01-04 17:00:00	45.3627	49.1037	47.9193	54.8303	53.278	49.0672			1900-01-04 17:00:00	0.886758	0.895625	0.853767	0.934812	0.891507	0.944997
	1900-01-04 18:00:00	47.4168	47.463	53.5157	55.2348	55.9542	56.2221			1900-01-04 18:00:00	0.86718	0.902021	0.883519	0.92426	0.912468	0.928844
	1900-01-04 19:00:00	58.5143	47.1794	53.8708	52.376	62.6398	54.8039			1900-01-04 19:00:00	0.871417	0.930743	0.903067	0.915676	0.912355	0.934491
	1900-01-04 20:00:00	64.9173	58.9836	69.1816	61.4415	68.7511	63.5535			1900-01-04 20:00:00	0.871231	0.906214	0.898446	0.925924	0.922818	0.940623
	1900-01-04 21:00:00	66.7366	64.8109	75.9561	71.9846	73.4069	65.3423			1900-01-04 21:00:00	0.906176	0.920365	0.904414	0.930003	0.933445	0.952209
	1900-01-04 22:00:00	63.5854	63.6712	66.4131	76.4439	75.7344	70.2533			1900-01-04 22:00:00	0.921921	0.935726	0.921127	0.936974	0.950334	0.95081
	1900-01-04 23:00:00	64.339	68.0816	65.068	76.4423	71.8033	77.7354			1900-01-04 23:00:00	0.9226	0.935174	0.924636	0.938129	0.946081	0.944151
	1900-01-05	70.8438	62.0353	71.8178	73.2839	70.1759	75.4749			1900-01-05	0.914344	0.952265	0.911994	0.952857	0.946672	0.94963
	1900-01-05 01:00:00	60.6051	60.4952	63.298	69.2141	71.1787	63.7681			1900-01-05 01:00:00	0.908768	0.948447	0.890962	0.949945	0.911132	0.955199
	1900-01-05 02:00:00	60.7912	65.35	65.6741	65.9153	65.8235	67.7511			1900-01-05 02:00:00	0.905542	0.921043	0.895834	0.962506	0.882884	0.936199
	1900-01-05 03:00:00	57.6002	57.5127	52.0698	59.0628	64.3859	63.0683			1900-01-05 03:00:00	0.887744	0.89505	0.855708	0.951783	0.880794	0.940901
	1900-01-05 04:00:00	59.7744	56.91	57.1427	64.409	67.1246	63.1479			1900-01-05 04:00:00	0.889883	0.891326	0.812522	0.919637	0.866773	0.909443
	1900-01-05 05:00:00	62.2591	55.7958	58.5255	67.6417	67.0907	62.8423			1900-01-05 05:00:00	0.906811	0.890972	0.822106	0.91312	0.883871	0.889998
	1900-01-05 06:00:00	71.2437	58.2454	61.2012	63.7256	69.4724	61.7223			1900-01-05 06:00:00	0.903999	0.884082	0.875046	0.913396	0.904473	0.906252
	1900-01-05 07:00:00	63.6115	53.0725	68.4174	62.4106	62.8662	61.3731			1900-01-05 07:00:00	0.900989	0.877782	0.887254	0.924713	0.907283	0.916151
	1900-01-05 08:00:00	49.3136	64.877	57.6917	50.6674	57.7141	55.2996		Day6	1900-01-05 08:00:00	0.843949	0.865993	0.893183	0.869375	0.862394	0.910411
	1900-01-05 09:00:00	51.0394	47.3153	46.8623	58.2268	51.2456	64.3485			1900-01-05 09:00:00	0.849255	0.895327	0.866701	0.867369	0.845765	0.880449
	1900-01-05 10:00:00	50.018	50.1167	46.7224	48.0453	55.7498	54.497			1900-01-05 10:00:00	0.836618	0.841577	0.833277	0.867406	0.810915	0.899666
	1900-01-05 11:00:00	55.0286	46.8006	51.2781	48.1488	53.6034	54.6766			1900-01-05 11:00:00	0.813674	0.83873	0.810785	0.851585	0.826796	0.873628
Day6	1900-01-05 12:00:00	50.4448	45.9299	44.3693	45.2112	51.1976	52.3771			1900-01-05 12:00:00	0.850427	0.848106	0.812267	0.831511	0.826039	0.839176
	1900-01-05 13:00:00	43.9391	44.9435	46.002	48.0106	51.4576	49.7825			1900-01-05 13:00:00	0.821264	0.828868	0.802247	0.833436	0.806888	0.835872
	1900-01-05 14:00:00	52.1969	47.64	50.401	44.304	53.5384	56.0796			1900-01-05 14:00:00	0.803719	0.844971	0.794618	0.86783	0.812237	0.884176
	1900-01-05 15:00:00	46.455	47.1133	52.568	43.7426	53.7089	59.4285			1900-01-05 15:00:00	0.836538	0.843481	0.869915	0.846101	0.857533	0.896157
	1900-01-05 16:00:00	44.6127	51.3434	44.5058	53.3391	50.3741	57.9194			1900-01-05 16:00:00	0.853716	0.872838	0.840135	0.840362	0.875644	0.947146
	1900-01-05 17:00:00	51.7881	42.8154	54.5478	63.1281	51.8493	58.7347			1900-01-05 17:00:00	0.854087	0.845293	0.843778	0.903029	0.827104	0.940534
	1900-01-05 18:00:00	47.8671	47.3415	52.0923	46.7318	51.1072	59.7491			1900-01-05 18:00:00	0.840576	0.875378	0.897838	0.923075	0.809851	0.904746
	1900-01-05 19:00:00	50.2678	50.2416	53.13	48.1399	55.6298	59.357			1900-01-05 19:00:00	0.872651	0.871617	0.906875	0.869633	0.853029	0.950505
	1900-01-05 20:00:00	61.2453	58.7381	68.6667	59.336	73.354	70.5099			1900-01-05 20:00:00	0.904505	0.878895	0.901033	0.844274	0.895037	0.934203
	1900-01-05 21:00:00	71.1814	65.8645	77.3365	65.4232	78.8429	67.6159			1900-01-05 21:00:00	0.913433	0.911729	0.906571	0.919782	0.91942	0.959751
	1900-01-05 22:00:00	63.2269	63.8829	71.7556	67.2743	83.0259	71.6363			1900-01-05 22:00:00	0.93332	0.934399	0.924395	0.937516	0.918209	0.95522
	1900-01-05 23:00:00	65.0018	58.1229	66.4835	69.5523	81.7953	66.9455			1900-01-05 23:00:00	0.930139	0.94116	0.933605	0.942317	0.914674	0.958954
	1900-01-06	66.8854	59.8913	61.0488	66.5249	78.2101	66.5777			1900-01-06	0.901192	0.945552	0.9385	0.967561	0.926744	0.960756
	1900-01-06 01:00:00	54.0636	61.6535	62.4671	68.0984	74.7646	65.8577			1900-01-06 01:00:00	0.838541	0.932359	0.9338	0.946969	0.907114	0.948469
	1900-01-06 02:00:00	56.3322	58.3964	59.7001	61.6479	65.3342	67.7684			1900-01-06 02:00:00	0.833227	0.943881	0.936487	0.9639	0.890325	0.950984
	1900-01-06 03:00:00	56.8355	56.7975	55.7072	65.0571	60.0765	61.7207			1900-01-06 03:00:00	0.855039	0.930148	0.932375	0.941131	0.853656	0.906183
	1900-01-06 04:00:00	59.1699	59.6902	51.6647	58.7711	58.7924	64.6312			1900-01-06 04:00:00	0.863892	0.927961	0.891032	0.924353	0.884459	0.895561
	1900-01-06 05:00:00	60.331	59.5458	61.0346	58.0502	60.7917	61.6012			1900-01-06 05:00:00	0.886972	0.914941	0.867898	0.888891	0.892419	0.902653
	1900-01-06 06:00:00	65.1519	60.6911	65.1324	58.2636	68.3603	60.8714			1900-01-06 06:00:00	0.901547	0.891608	0.895643	0.882318	0.916783	0.902641
	1900-01-06 07:00:00	67.0929	48.4362	62.6351	54.464	54.4147	61.6739			1900-01-06 07:00:00	0.909946	0.897348	0.888795	0.904353	0.926553	0.921513
	1900-01-06 08:00:00	57.6789	48.4963	56.9855	49.9589	62.5477	60.6314		Day7	1900-01-06 08:00:00	0.922826	0.850876	0.857936	0.880812	0.916158	0.918612
	1900-01-06 09:00:00	46.4547	49.0057	46.7534	47.3081	52.7089	55.6169			1900-01-06 09:00:00	0.893051	0.886726	0.858226	0.840158	0.928408	0.885328
	1900-01-06 10:00:00	55.018	47.4178	50.9771	47.8832	51.2417	49.6957			1900-01-06 10:00:00	0.84043	0.841187	0.811901	0.815927	0.891409	0.854037
	1900-01-06 11:00:00	51.2168	50.2201	70.467	53.1664	57.7796	55.0281			1900-01-06 11:00:00	0.841602	0.872611	0.837298	0.839101	0.899535	0.874734
	1900-01-06 12:00:00	50.6442	48.6705	50.4881	44.6478	48.9168	53.43			1900-01-06 12:00:00	0.814087	0.871861	0.877806	0.84132	0.875145	0.85324
Day7	1900-01-06 13:00:00	43.5874	45.7582	45.688	42.2971	47.6895	51.3564			1900-01-06 13:00:00	0.814817	0.851591	0.840861	0.830204	0.845893	0.83787
	1900-01-06 14:00:00	51.5032	44.8981	53.9856	41.0966	51.2555	51.5277			1900-01-06 14:00:00	0.819363	0.868206	0.826933	0.823174	0.832361	0.84977
	1900-01-06 15:00:00	52.3755	45.9738	48.2681	43.0924	52.147	51.4091			1900-01-06 15:00:00	0.829154	0.866916	0.852573	0.79293	0.899976	0.843001
	1900-01-06 16:00:00	44.8274	51.1258	44.6505	43.6178	52.8843	50.7017			1900-01-06 16:00:00	0.848115	0.878144	0.845223	0.798828	0.879714	0.832028
	1900-01-06 17:00:00	49.7416	41.839	56.796	51.0736	64.065	48.5195			1900-01-06 17:00:00	0.870801	0.898717	0.848792	0.801474	0.913644	0.822603
	1900-01-06 18:00:00	49.1163	50.2677	51.9407	51.1909	53.7368	55.6801			1900-01-06 18:00:00	0.87018	0.863555	0.841889	0.858948	0.884915	0.806259
	1900-01-06 19:00:00	50.8752	46.3072	55.8647	48.5649	57.6757	53.7948			1900-01-06 19:00:00	0.889635	0.894666	0.88744	0.840196	0.911868	0.897956
	1900-01-06 20:00:00	62.2999	55.0044	67.2955	60.6164	65.4518	63.3712			1900-01-06 20:00:00	0.89766	0.905509	0.907123	0.855689	0.92618	0.896581
	1900-01-06 21:00:00	68.4515	65.2946	78.6409	60.1003	70.9436	62.1576			1900-01-06 21:00:00	0.919158	0.916696	0.908758	0.886378	0.926538	0.944207
	1900-01-06 22:00:00	68.1605	65.0671	68.034	69.2043	68.5329	62.0323			1900-01-06 22:00:00	0.922619	0.929328	0.928875	0.901577	0.934155	0.935669
	1900-01-06 23:00:00	63.6814	60.5625	68.9686	67.2149	64.6959	64.0996			1900-01-06 23:00:00	0.937256	0.94589	0.930833	0.930397	0.942613	0.950203
	1900-01-07	59.6728	64.0858	79.3744	72.0737	65.5293	65.0332			1900-01-07	0.940048	0.936215	0.916305	0.935054	0.905233	0.948036
	1900-01-07 01:00:00	66.8915	54.1988	64.0092	57.5101	76.4487	66.7455			1900-01-07 01:00:00	0.893629	0.938942	0.944434	0.957672	0.917693	0.960424
	1900-01-07 02:00:00	57.1424	58.7307	61.1229	72.6	61.1989	61.8115			1900-01-07 02:00:00	0.880022	0.899353	0.938553	0.917949	0.868696	0.965771
	1900-01-07 03:00:00	53.1835	52.9733	58.0304	62.4396	57.3643	59.0426			1900-01-07 03:00:00	0.853267	0.856289	0.938607	0.87402	0.836471	0.959954
	1900-01-07 04:00:00	60.2738	56.8856	60.8531	61.5107	57.4429	57.4555			1900-01-07 04:00:00	0.875943	0.846583	0.915888	0.847844	0.803736	0.94789
	1900-01-07 05:00:00	59.0908	54.3243	56.5745	66.2069	67.5586	55.6221			1900-01-07 05:00:00	0.904583	0.887538	0.907269	0.853941	0.824711	0.930093
	1900-01-07 06:00:00	67.1682	55.3401	61.9672	60.927	67.3297	54.3095			1900-01-07 06:00:00	0.906873	0.930214	0.885153	0.841401	0.894123	0.889365
	1900-01-07 07:00:00	52.9442	51.9638	63.6538	60.6736	63.6055	53.946			1900-01-07 07:00:00	0.938428	0.937777	0.917618	0.871834	0.898134	0.88364

## Sheet: S2A-B
(A and B) RT and real-time PCR analysis of G6Pase (G6pc1) and PEPCK (Pck1) gene expression in the liver of control mice and mice subjected to bilateral cast immobilization for the indicated times (n = 5 or 6 per group).
	Gapdh	G6pc1	G6pc1/Gapdh			Gapdh	Pck1	Pck1/Gapdh
Control 1	0.409913	0.085536	0.208669		Control 1	0.409913	0.0867794	0.211702
Control 2	0.581773	0.275182	0.473006		Control 2	0.581773	0.302862	0.520584
Control 3	0.381727	0.0638022	0.167141		Control 3	0.381727	0.0577197	0.151207
Control 4	0.348952	0.116459	0.33374		Control 4	0.348952	0.187767	0.538089
Control 5	0.327805	-	-		Control 5	0.327805	-	-
Control 6	0.369175	0.374217	1.01366		Control 6	0.369175	0.265474	0.7191
Imm (10 h) 1	0.515985	0.279469	0.541622		Imm (10 h) 1	0.515985	0.370067	0.717206
Imm (10 h) 2	0.412407	0.583064	1.41381		Imm (10 h) 2	0.412407	0.261267	0.633517
Imm (10 h) 3	0.423172	0.724076	1.71107		Imm (10 h) 3	0.423172	0.477132	1.12751
Imm (10 h) 4	0.756738	0.235571	0.311298		Imm (10 h) 4	0.756738	0.397903	0.525813
Imm (10 h) 5	0.437532	0.119139	0.272298		Imm (10 h) 5	0.437532	0.364987	0.834196
Imm (10 h) 6	0.433606	0.628409	1.44926		Imm (10 h) 6	0.433606	0.456937	1.05381
Imm (24 h) 1	0.443826	0.22442	0.505649		Imm (24 h) 1	0.443826	0.344681	0.776613
Imm (24 h) 2	0.541398	0.708465	1.30858		Imm (24 h) 2	0.541398	0.714556	1.31983
Imm (24 h) 3	0.461045	0.195013	0.42298		Imm (24 h) 3	0.461045	0.157074	0.340691
Imm (24 h) 4	0.305194	0.082519	0.270382		Imm (24 h) 4	0.305194	0.140991	0.461973
Imm (24 h) 5	0.43497	0.120022	0.275932		Imm (24 h) 5	0.43497	0.253063	0.581793
Imm (24 h) 6	0.459925	0.131814	0.286598		Imm (24 h) 6	0.459925	0.106258	0.231033
Imm (day 3) 1	0.496016	0.168458	0.339622		Imm (day 3) 1	0.496016	0.247883	0.499748
Imm (day 3) 2	0.403984	0.533597	1.32084		Imm (day 3) 2	0.403984	0.608881	1.50719
Imm (day 3) 3	0.55476	0.941744	1.69757		Imm (day 3) 3	0.55476	0.762337	1.37417
Imm (day 3) 4	0.390893	0.0603834	0.154476		Imm (day 3) 4	0.390893	0.142339	0.364137
Imm (day 3) 5	0.408483	0.363974	0.891037		Imm (day 3) 5	0.408483	0.201944	0.494375
Imm (day 3) 6	0.568773	0.472625	0.830956		Imm (day 3) 6	0.568773	0.295553	0.519633
Imm (day 5) 1	0.49973	0.139264	0.278678		Imm (day 5) 1	0.49973	0.285343	0.570995
Imm (day 5) 2	0.526762	0.611677	1.1612		Imm (day 5) 2	0.526762	1.22157	2.31901
Imm (day 5) 3	0.449816	0.448249	0.996518		Imm (day 5) 3	0.449816	0.692771	1.54012
Imm (day 5) 4	0.403226	0.483114	1.19812		Imm (day 5) 4	0.403226	0.47481	1.17753
Imm (day 5) 5	0.443253	0.529374	1.19429		Imm (day 5) 5	0.443253	0.615102	1.3877
Imm (day 5) 6	0.52959	0.9796	1.84973		Imm (day 5) 6	0.52959	1.08019	2.03967
Imm (day 7) 1	0.471039	0.516523	1.09656		Imm (day 7) 1	0.471039	0.804917	1.70881
Imm (day 7) 2	0.411731	0.727165	1.76612		Imm (day 7) 2	0.411731	0.690408	1.67684
Imm (day 7) 3	0.546094	1.39416	2.55297		Imm (day 7) 3	0.546094	0.911442	1.66902
Imm (day 7) 4	0.343222	0.188289	0.548592		Imm (day 7) 4	0.343222	0.188003	0.547759
Imm (day 7) 5	0.527314	0.617164	1.17039		Imm (day 7) 5	0.527314	0.835984	1.58536
Imm (day 7) 6	0.746381	0.283127	0.379333		Imm (day 7) 6	0.746381	0.337526	0.452216

## Sheet: S2C
(C) Concentrations of carbohydrate metabolites in the liver of control mice and mice subjected to bilateral cast immobilization for the indicated times.
n mole/g tissue	Control 1	Control 2	Control 3	Imm (24 h) 1	Imm (24 h) 2	Imm (24 h) 3	Imm (day 3) 1	Imm (day 3) 2	Imm (day 3) 3	Imm (day 5) 1	Imm (day 5) 2	Imm (day 5) 3
Glucose 1-phosphate	152.041	116.12	150.755	100.563	161.805	153.172	166.371	171.397	164.245	153.952	121.604	128.297
Glucose 6-phosphate	280.778	130.206	167.774	116.969	123.667	135.165	198.005	129.735	174.02	228.021	115.36	167.905
Fructose 6-phosphate	180.002	532.8	208.046	296.878	248.724	139.487	212.62	268.123	228.712	135.625	185.848	219.703
Fructose 1,6-diphosphate	267.3	4.70131	449.147	83.2581	145.741	340.35	185.581	369.564	207.432	307.316	174.521	200.232
3-Phosphoglyceric acid	127.325	92.2465	218.867	496.539	416.233	114.319	120.438	112.441	363.606	196.42	214.309	310.617
2-Phosphoglyceric acid	48.3461	50.1313	87.1444	210.711	165.759	64.9691	40.21	63.3288	1265.56	101.954	44.9775	130.788
Phosphoenolpyruvic acid	38.3415	42.9098	55.3176	125.647	78.4241	35.2956	38.0987	35.3562	64.0627	60.0086	44.7451	67.4879
Pyruvic acid	121.785	145.127	110.36	96.6389	115.834	148.175	124.927	170.672	117.798	152.585	117.474	101.91
Lactic acid	32347.5	27575.6	26327.2	17550.3	26020.4	23903.7	26507.2	24358.4	20398.7	20884.8	21011.2	21072.1
6-Phosphogluconic acid	109.372	92.4277	101.695	106.186	91.5695	86.0431	107.806	118.655	198.116	128.519	144.867	146.89
Acetyl CoA_divalent	3.47296	2.14778	3.11906	1.7439	1.60716	2.29445	0.918352	2.13319	2.83576	2.16508	1.54573	1.17016
Isocitiric acid	7.48487	1.79563	3.20619	1.30613	3.439	5.08536	6.66344	2.5605	2.55232	9.03713	1.87108	4.14472
Succinic acid	78.7215	54.729	76.8377	48.9519	67.0977	65.4534	58.1712	57.9095	73.1687	58.9576	57.8913	80.0604
Fumaric acid	399.297	311.959	372.077	336.848	326.7	212.67	419.363	309.341	487.67	467.16	350.279	449.855
Malic acid	1503.08	1401.94	1770.29	1357.32	1350.17	1141.6	1525.56	1519.33	1931.44	1835.6	1630.8	1720.42
Glycerol 3-phosphate	584.529	783.69	210.529	518.337	162.054	91.0407	388.003	172.628	454.779	206.276	939.85	538.058

[truncated: 3 more sheets: S2D, S2E, S2F]
