# Supplementary material for: Brown adipose tissue and skeletal muscle coordinately contribute to thermogenesis in mice
Source: eLife. 2025 Oct 27;13:RP99982. doi: 10.7554/eLife.99982 (PMC12558653; doi:10.7554/eLife.99982)
Supplement: Figure 3—source data 1. [file elife-99982-fig3-data1.xlsx]

## Sheet: Fig.3A-B
(A and B) Metabolomics analysis of amino acid concentrations in soleus and EDL muscles (A) as well as in serum and the liver (B) of control mice and mice subjected to bilateral cast immobilization for the indicated times
Soleus														EDL
n mol/g tissue weight	Control 1	Control 2	Control 3	Imm (24 h) 1	Imm (24 h) 2	Imm (24 h) 3	Imm (day 3) 1	Imm (day 3) 2	Imm (day 3) 3	Imm (day 5) 1	Imm (day 5) 2	Imm (day 5) 3		n mol/g tissue weight	Control 1	Control 2	Control 3	Imm (24 h) 1	Imm (24 h) 2	Imm (24 h) 3	Imm (day 3) 1	Imm (day 3) 2	Imm (day 3) 3	Imm (day 5) 1	Imm (day 5) 2	Imm (day 5) 3
Gly	918.882	1164.98	911.935	1708.18	1766.47	691.377	1111.78	1746.77	2281	8469.62	4674.81	1161.46		Gly	2582.34	2125.32	2253.47	626.458	937.825	679.144	1377.96	1020.17	832.767	2653.64	725.111	1581.8
Ala	2507.78	3127.36	2992.55	3354.06	2599.4	2359	2660.07	1779.57	4770.39	9553.2	4630.42	2203		Ala	2267.2	2179.83	2342.36	927.506	2410.68	1376.31	1519.69	1005.36	1741.62	2993.14	1309.59	2038.87
Ser	423.165	550.956	511.231	697.31	465.405	425.163	737.181	714.374	1546.12	3480.86	2415.99	600.581		Ser	666.545	444.93	387.301	547.68	325.764	255.417	599.734	521.85	564.472	1090.6	422.487	383.594
Pro	152.994	164.594	154.34	678.271	245.129	208.49	289.489	483.774	614.615	1954.64	841.633	291.116		Pro	178.179	188.368	165.492	248.314	201.096	225.531	386.233	313.224	224.389	612.414	191.021	354.71
Val	223.188	301.022	289.45	1639.85	270.743	233.914	350.284	665.278	724.503	2144.42	1221.35	356.714		Val	265.261	269.705	235.471	393.517	202.17	594.848	508.973	478.005	264.508	671.873	252.13	304.04
Thr	278.314	388.169	317.794	1153.72	409.403	383.018	549.456	632.285	1109.1	2195.26	1309.83	458.754		Thr	295.381	336.161	286.667	263.577	291.612	424.808	496.101	458.296	404.918	687.805	261.203	348.928
Ile	98.3507	111.726	114.877	605.609	119.393	100.881	149.012	310.009	315.044	887.845	516.591	168.587		Ile	98.0417	102.016	86.1607	162.158	97.2631	232.822	235.963	254.068	115.019	278.173	101.89	123.471
Leu	199.545	219.627	242.876	921.594	233.902	183.425	292.186	519.422	611.575	2007.27	1201.25	300.87		Leu	184.504	174.459	158.245	274.873	172.287	436.324	429.027	420.372	223.279	628.905	227.785	237.596
Asn	132.067	184.164	190.239	277.198	209.815	179.792	335.704	284.803	677.87	1508.17	1071.71	262.907		Asn	91.778	98.864	90.3455	78.7228	78.4612	99.7919	246.918	206.33	247.483	472.53	168.175	130.652
Asp	520.252	842.522	640.857	172.375	659.815	469.961	719.735	933.659	1541.4	3184.69	1586.72	468.581		Asp	323.479	218.892	236.058	273.245	261.34	46.5301	676.282	762.248	562.747	997.805	489.299	309.399
Gln	3432.58	4082.38	3515.96	4944.2	3425.06	3750.57	4272.79	1426.42	4819.75	1724.14	3627.62	3562.38		Gln	2401.12	2251.26	2648.84	408.296	1775.68	2480.13	909.648	744.444	3600.26	1921.48	1767.28	2502.88
Lys	578.79	634.913	557.394	1633.79	708.203	586.712	933.253	859.453	969.008	1179.35	1494.01	783.567		Lys	449.58	416.503	454.25	604.433	415.965	976.767	759.025	645.958	658.755	807.069	380.839	390.039
Glu	1305.57	2085.84	1837.32	516.896	827.118	809.267	1332.24	2553.59	1581.96	2457.58	3369.26	639.465		Glu	311.573	337.104	270.445	436.515	205.951	128.376	1891.98	2043.7	1160.47	1829.4	531.227	322.883
His	148.019	189.979	154.334	396.891	144.576	134.579	202.729	188.98	168.881	267.097	360.861	177.405		His	159.267	122.611	120.535	130.812	110.578	180.115	149.329	148.151	120.894	193.493	93.7458	144.682
Phe	107.383	110.786	124.879	432.394	104.765	85.7597	147.231	242.513	131.295	475.232	605.367	145.271		Phe	108.75	97.082	88.0926	170.33	91.9359	177.952	209.851	197.442	105.739	321.135	104.684	112.337
Arg	220.405	235.651	205.048	171.812	252.822	225.549	322.105	102.702	339.827	470.007	730.813	272.776		Arg	152.454	151.954	155.507	179.245	128.331	366.037	82.1824	77.0762	256.206	341.823	179.178	135.482
Tyr	1766.89	2418.59	2064.45	2797.97	2176.92	1809.75	2289.82	2023.13	2100.6	3179.32	3261.91	2875		Tyr	1680.26	1641.95	1790.49	2233.38	1488.55	1388.13	1966.33	1831.61	1502.3	1852.58	2546.91	1806.57
Trp	27.8428	35.1011	35.58	426.051	29.6714	25.9001	41.9521	83.9086	44.632	100.177	120.98	39.7673		Trp	25.5767	25.5973	26.2156	52.0703	21.1804	181.892	64.2974	61.8064	31.4855	64.8192	26.3604	29.1289
Serum														Liver
n mol/g tissue weight	Control 1	Control 2	Control 3	Imm (24 h) 1	Imm (24 h) 2	Imm (24 h) 3	Imm (day 3) 1	Imm (day 3) 2	Imm (day 3) 3	Imm (day 5) 1	Imm (day 5) 2	Imm (day 5) 3		n mol/g tissue weight	Control 1	Control 2	Control 3	Imm (24 h) 1	Imm (24 h) 2	Imm (24 h) 3	Imm (day 3) 1	Imm (day 3) 2	Imm (day 3) 3	Imm (day 5) 1	Imm (day 5) 2	Imm (day 5) 3
Gly	270.775	355.885	433.962	239.145	204.075	215.036	280.738	263.64	419.129	189.712	218.662	252.226		Gly	5243.4	4972.63	3960.33	3437.4	4164.85	3650.33	3861.8	4237.87	4440.33	4606.62	4767.45	4303.38
Ala	398.046	541.951	502.17	469.569	388.498	404.599	440.189	397.49	992.548	259.95	380.111	363.802		Ala	8526.72	7961.69	6866.91	4592.37	7031.63	6504.91	7166.53	4944.45	7244.95	7892.09	5777.99	5485.85
Ser	93.0015	113.923	263.611	97.6235	75.6484	84.9902	111.871	101.02	197.288	65.9621	73.8552	77.4239		Ser	1677.57	1656.63	1582.09	1107.84	1559.59	1497.18	1259.91	1233.21	2105.39	1729.29	1646.7	1562.58
Pro	70.7324	91.8427	98.2181	94.958	59.8591	68.2052	89.0619	80.4228	136.632	49.4982	67.8551	58.1764		Pro	978.879	898.053	795.406	679.426	905.308	848.143	705.894	718.222	898.645	912.539	992.982	907.371
Val	145.165	201.86	172.697	229.579	149.24	168.285	208.644	188.405	230.75	119.913	185.709	174.81		Val	1347.94	1372.36	993.399	919.483	1275.84	1099.68	983.017	1016.11	1174.11	1221.65	1285.12	1222.45
Thr	99.0376	160.301	143.828	161.521	120.894	121.073	177.395	160.187	396.353	79.9953	111.602	90.1965		Thr	1465.78	1369.35	1193.73	21.6004	11.7794	33.7378	26.519	27.9781	34.4496	38.8033	33.0786	30.0905
Ile	54.8597	78.2665	73.8152	84.7852	63.212	69.043	83.7828	75.6558	76.843	43.2105	63.2618	68.5903		Ile	756.988	684.047	505.177	390.824	657.584	549.608	463.716	449.221	536.827	581.982	673.796	575.462
Leu	96.6372	129.669	126.274	129.023	123.859	146.508	147.479	133.174	158.973	82.0197	130.785	129.429		Leu	1823.57	1773.14	1325.83	1041.43	1634.59	1375.92	1212.82	1088.82	1358.85	1445.29	1558.93	1312.22
Asn	32.5015	47.5536	46.7424	38.8077	28.3457	32.077	40.345	36.4315	86.5379	24.6811	26.6326	27.6452		Asn	917.879	845.488	779.234	599.292	836.762	756.674	603.764	671.969	919.599	843.943	903.737	884.869
Asp	12.3614	10.2533	41.2733	24.1325	13.2056	18.5625	12.6634	11.4351	22.232	13.2523	6.418	19.5315		Asp	740.749	631.635	709.617	612.674	595.165	513.256	564.815	563.025	1052.19	907.745	824.792	812.308
Gln	863.564	854.8	905.573	692.189	719.412	799.498	724.985	654.661	1163.49	566.717	611.382	769.74		Gln	6099.05	5489.42	5864.18	3291.38	5040.24	3788.24	4163.23	3981.92	3248.73	3784.57	4608.5	4444.09
Lys	271.668	316.627	278.682	228.731	294.436	294.222	316.29	285.61	348.678	187.794	283.875	288.513		Lys	1898.77	1757.9	1523.11	1483.86	1857.27	1809.65	1564.36	1693.27	1845.57	1810.01	2115.11	1923.8
Glu	41.4174	34.1666	67.7944	72.3654	36.9693	41.0685	46.668	42.1412	81.9648	71.5892	20.0572	86.789		Glu	2415.54	2552.44	1771.27	1605.19	1686.19	2443.83	1515.92	1237.22	3613.95	2665.31	2540.13	2290.08
His	53.4505	59.1337	70.0995	55.5647	49.5244	55.0879	61.0162	55.0976	103.826	44.048	59.3869	57.9683		His	812.207	847.747	714.347	558.794	716.153	653.805	622.133	568.365	725.86	679.083	698.934	723.813
Phe	46.0475	52.3286	53.7344	60.5352	52.0036	57.6836	66.7794	60.3017	98.2766	40.2281	61.3808	58.0081		Phe	794.779	849.492	636.805	470.389	798.262	709.74	505.556	511.603	684.967	745.109	736.263	577.428
Arg	87.2984	110.597	92.6151	24.0537	112.801	105.576	52.6646	47.5561	162.374	46.7904	105.64	68.6313		Arg	7.88727	7.14196	6.10928	3.86221	5.84946	5.01801	4.89163	4.6525	5.95588	8.80595	5.06743	8.63425
Tyr	392.115	392.399	391.769	391.716	393.338	392.453	392.716	354.622	624.326	246.545	389.77	377.88		Tyr	370.238	385.365	364.963	386.226	363.967	377.572	371.283	400.018	392.183	393.636	378.742	392.18
Trp	53.8552	61.1389	57.3819		50.9348	34.939	70.9874	64.1015	92.6972	35.4842	56.6941	52.581		Trp	87.8877	89.1432	67.0109	43.3427	64.6516	65.3185	58.6901	47.7689	54.1294	64.6865	77.0964	71.2628

## Sheet: Fig.3C
(C) Organ-specific [3H]leucine uptake in control mice and mice subjected to bilateral cast immobilization for 24 h (n = 4–6 per group). sWAT, subcutaneous WAT.
Blank	2022-02-10	22/02/18
	144.51	22.16
	Control 1	Control 2	Control 3	Control 4	Control 5	Control 6	Imm (24 h) 1	Imm (24 h) 2	Imm (24 h) 3	Imm (24 h) 4	Imm (24 h) 5	Imm (24 h) 6
	Tissue Weight(g)
Soleus	0.019	0.019	0.022	0.023	0.021	0.022	0.018	0.021	0.018	0.02	0.021	0.02
EDL	0.023	0.026	0.027	0.025	0.028	0.024	0.027	0.033	0.024	0.028	0.025	0.026
Gastrocnemius	0.085	0.095	0.097	0.084	0.066	0.097	0.066	0.079	0.1	0.072	0.077	0.09
Liver	0.117	0.145	0.151	0.12	0.126	0.138	0.114	0.157	0.163	0.099	0.118	0.125
BAT	0.024	0.017	0.022	0.025	0.032	0.027	0.012	0.032	0.028	0.035	0.031	0.033
eWAT	0.087	0.111	0.103	0.18	0.141	0.13	0.091	0.12	0.171	0.105	0.143	0.128
sWAT	0.078	0.077	0.09	0.129	0.091	0.095	0.064	0.107	0.122	0.055	0.066	0.082
Heart	0.082	0.088	0.07	0.071	0.064	0.08	0.059	0.078	0.063	0.038	0.066	0.066
Spleen	0.054	0.044	0.064	0.033	0.031	0.029	0.066	0.044	0.05	0.032	0.022	0.037
Kidney	0.174	0.205	0.185	0.103	0.107	0.094	0.189	0.199	0.156	0.08	0.105	0.101
	dpm
Soleus	14108.8	15587.3	15092.4	5590.06	6777.72	7684.15	9218.75	10540.3	12781.4	6516.56	5280.33	4709.21
EDL	13092.5	13578.8	15366.7	5350.65	8656.95	7979.9	12386.1	13728.8	18359.4	8176.89	6798.31	6580.37
Gastrocnemius	55397	52865.1	67229.3	19538.9	14324.3	24583.8	32464.5	40581	58809.4	17063.7	21772.4	19375.4
Liver	148366	161308	152311	102383	116262	158148	148382	202652	215438	167062	134927	199799
BAT	24906	17688.6	22539.3	13197.3	17490.4	19431.3	14580.9	55700.3	63450.9	34217.8	27973	35435.2
eWAT	14924.4	19775.3	16370.5	10078.7	10273.6	8661.76	19750.8	23402.1	27831.7	8493.98	7213.86	11325.6
sWAT	34373	29588.4	38254.9	15545.9	16486.5	17964.7	31424.1	53002.7	35142.9	10525.5	16101.8	18051.3
Heart	48864.3	53613.7	43619.5	19275.7	15728.6	17970.7	47613.7	48744.7	-	12267.5	20059.7	19591.8
Spleen	95492.3	40929.8	126732	18107	-	-	120850	57849.2	53577.2	26135.2	-	-
Kidney	252127	309904	285743	111448	102480	98790.2	310291	319322	320387	95027.5	129351	105901
	dpm (-blank)
Soleus	13964.3	15442.8	14947.9	9257.34	11228.9	12733.5	9074.24	10395.8	12636.9	10795.3	8743.19	7795.13
EDL	12948	13434.3	15222.2	8859.92	14348.4	13224.5	12241.6	13584.3	18214.9	13551.5	11263	10901.3
Gastrocnemius	55252.5	52720.6	67084.8	32412.4	23756.2	40786.9	32320	40436.5	58664.9	28303.6	36120	32141
Liver	148221	161163	152166	127957	145305	197663	148237	202507	215293	208805	168637	249727
BAT	24761.5	17544.1	22394.8	21885.4	29011.9	32233.8	14436.4	55555.8	63306.4	56779.4	46413	58800.3
eWAT	14779.9	19630.8	16226	16708.5	17032	14356.4	19606.3	23257.6	27687.2	14077.8	11952.8	18778.3
sWAT	34228.5	29443.9	38110.4	25784	27345.4	29799.2	31279.6	52858.2	34998.4	17450.2	26706.8	29943
Heart	48719.8	53469.2	43475	31975.5	26087.3	29809.2	47469.2	48600.2	-	20341.9	33276.9	32500.2
Spleen	95347.8	40785.3	126587	30035.5	-	-	120705	57704.7	53432.7	43362.3	-	-
Kidney	251982	309759	285598	184982	170095	163970	310146	319177	320242	157723	214700	175774
	Bq
Soleus	233.204	257.895	249.63	154.598	187.522	212.65	151.54	173.61	211.036	180.282	146.011	130.179
EDL	216.231	224.353	254.211	147.961	239.618	220.849	204.435	226.858	304.189	226.31	188.093	182.051
Gastrocnemius	922.717	880.434	1120.32	541.287	396.728	681.142	539.744	675.289	979.704	472.67	603.204	536.755
Liver	2475.3	2691.43	2541.18	2136.88	2426.6	3300.97	2475.57	3381.88	3595.4	3487.05	2816.23	4170.43
BAT	413.517	292.986	373.993	365.485	484.499	538.304	241.088	927.782	1057.22	948.216	775.097	981.965
eWAT	246.824	327.834	270.974	279.032	284.435	239.751	327.425	388.402	462.376	235.1	199.613	313.598
sWAT	571.616	491.713	636.444	430.593	456.669	497.647	522.369	882.732	584.473	291.418	446.004	500.048
Heart	813.62	892.935	726.032	533.991	435.658	497.814	792.735	811.623	-	339.71	555.725	542.754
Spleen	1592.31	681.114	2114.01	501.592	-	-	2015.78	963.668	892.326	724.15	-	-
Kidney	4208.11	5172.98	4769.49	3089.19	2840.58	2738.29	5179.45	5330.26	5348.05	2633.98	3585.5	2935.42
	Bq/g TW
Soleus	12273.9	13573.4	11346.8	6721.63	8929.61	9665.91	8418.88	8267.13	11724.2	9014.1	6952.92	6508.93
EDL	9401.37	8628.95	9415.21	5918.43	8557.78	9202.03	7571.65	6874.47	12674.5	8082.49	7523.71	7001.96
Gastrocnemius	10855.5	9267.72	11549.6	6443.9	6011.03	7022.08	8177.94	8547.97	9797.04	6564.86	7833.82	5963.94
Liver	21156.4	18561.6	16829	17807.3	19258.7	23920.1	21715.5	21540.6	22057.7	35222.7	23866.4	33363.5
BAT	17229.9	17234.5	16999.7	14619.4	15140.6	19937.2	20090.6	28993.2	37757.7	27091.9	25003.1	29756.5
eWAT	2837.06	2953.46	2630.82	1550.18	2017.27	1844.24	3598.08	3236.68	2703.95	2239.05	1395.89	2449.99
sWAT	7328.41	6385.88	7071.59	3337.93	5018.34	5238.39	8162.02	8249.83	4790.76	5298.51	6757.64	6098.15
Heart	9922.2	10147	10371.9	7521	6807.16	6222.67	13436.2	10405.4	-	8939.73	8420.07	8223.54
Spleen	29487.2	15479.9	33031.4	15199.8	-	-	30542.1	21901.6	17846.5	22629.7	-	-
Kidney	24184.5	25234.1	25781.1	29992.1	26547.5	29130.8	27404.5	26785.2	34282.4	32924.8	34147.6	29063.5

## Sheet: Fig.3D
(D) RT and real-time PCR analysis of SLC25A44 gene expression in sham-operated or denervated iBAT of control mice and mice subjected to subsequent bilateral cast immobilization for 24 h (n = 6 per group).
		Gapdh	Slc25a44	Slc25a44/Gapdh
Sham	Control 1	0.633598	0.384404	0.6067
	Control 2	0.63535	0.279192	0.43943
	Control 3	0.37156	0.30832	0.829798
	Control 4	0.586839	0.440674	0.750928
	Control 5	0.379755	0.233472	0.614798
	Control 6	0.680501	0.402182	0.591009
	Imm (24 h) 1	0.556499	0.415494	0.746622
	Imm (24 h) 2	0.249904	0.307444	1.23025
	Imm (24 h) 3	0.341964	0.354404	1.03638
	Imm (24 h) 4	0.423178	0.501297	1.1846
	Imm (24 h) 5	0.716325	0.805705	1.12477
	Imm (24 h) 6	0.400484	0.301221	0.752144
Denervated	Control 1	0.262081	0.0448363	0.171078
	Control 2	0.934129	0.0859647	0.0920266
	Control 3	0.428044	0.0447931	0.104646
	Control 4	0.765061	0.0364305	0.0476177
	Control 5	0.848056	0.0750814	0.0885335
	Control 6	0.671164	0.047237	0.0703808
	Imm (24 h) 1	1.07445	0.0275827	0.0256714
	Imm (24 h) 2	0.941938	0.0873428	0.0927267
	Imm (24 h) 3	0.903466	0.0649722	0.0719144
	Imm (24 h) 4	0.79767	0.1003	0.125741
	Imm (24 h) 5	1.36922	0.122557	0.0895084
	Imm (24 h) 6	0.346296	0.139799	0.403698

## Sheet: S1C-H
(C–H) RT and real-time PCR analysis of SLC1A5, SLC7A5, SLC38A2, SLC43A1, BCAT2, and BCKHDA gene expression, respectively, in iBAT of control mice or mice subjected to bilateral cast immobilization for the indicated times (n = 3–6 per group).
	Gapdh	Slc1a5	Slc1a5/Gapdh			Gapdh	Slc7a5	Slc7a5/Gapdh			Gapdh	Slc38a2	Slc38a2/Gapdh			Gapdh	Slc43a1	Slc43a1/Gapdh			Gapdh	Bcat2	Bcat2/Gapdh			Gapdh	Bckdha	Bckdha/Gapdh
Control 1	0.19773	0.657022	3.32282		Control 1	0.19773	0.283749	1.43503		Control 1	0.19773	0.357668	1.80887		Control 1	0.19773	0.319177	1.6142		Control 1	0.207281	0.518884	2.50329		Control 1	0.207281	0.375097	1.80961
Control 2	0.785715	0.490144	0.623819		Control 2	0.785715	0.840109	1.06923		Control 2	0.785715	0.542496	0.690449		Control 2	0.785715	0.480992	0.612171		Control 2	0.412877	0.503469	1.21942		Control 2	0.412877	0.430857	1.04355
Control 3	0.655208	0.639613	0.976199		Control 3	0.212597	0.347841	1.63615		Control 3	0.655208	0.597827	0.912422		Control 3	0.655208	0.441643	0.67405		Control 3	0.554963	0.783643	1.41206		Control 3	0.554963	0.85271	1.53652
Control 4	0.440554	0.649087	1.47334		Control 4	0.440554	0.46199	1.04866		Control 4	0.440554	0.880779	1.99925		Control 4	0.440554	0.280991	0.637813		Control 4	0.451072	0.514414	1.14042		Control 4	0.451072	0.790635	1.75279
Control 5	0.280866	0.793316	2.82453		Control 5	0.280866	0.325421	1.15863		Control 5	0.280866	0.607381	2.16253		Control 5	0.280866	0.180347	0.64211		Control 5	0.28611	0.371033	1.29682		Control 5	0.28611	0.44553	1.5572
Control 6	0.634847	0.934737	1.47238		Control 6	0.634847	0.443086	0.697943		Control 6	0.634847	0.830469	1.30814		Control 6	0.634847	0.277961	0.43784		Control 6	0.581126	0.731182	1.25822		Control 6	0.581126	0.919288	1.58191
Imm (10 h) 1	0.330298	1.72906	5.23484		Imm (10 h) 1	0.257258	0.550158	2.13855		Imm (10 h) 1	0.330298	1.0215	3.09267		Imm (10 h) 1	0.330298	0.186964	0.566047		Imm (10 h) 1	1.21973	1.07571	0.881926		Imm (10 h) 1	1.21973	0.761958	0.624695
Imm (10 h) 2	0.367421	0.815043	2.21828		Imm (10 h) 2	0.366258	0.359384	0.981232		Imm (10 h) 2	0.367421	0.50555	1.37594		Imm (10 h) 2	0.367421	0.203549	0.553993		Imm (10 h) 2	0.926669	0.508851	0.549118		Imm (10 h) 2	0.926669	0.433126	0.467401
Imm (10 h) 3	0.354546	1.52885	4.31213		Imm (10 h) 3	0.271277	0.369785	1.36313		Imm (10 h) 3	0.354546	0.532362	1.50153		Imm (10 h) 3	0.354546	0.272616	0.768916		Imm (10 h) 3	1.06919	0.806042	0.753878		Imm (10 h) 3	1.06919	0.605267	0.566096
Imm (10 h) 4	0.257258	1.59656	6.20608		Imm (10 h) 4	0.388536	0.38737	0.997		Imm (10 h) 4	0.257258	0.959092	3.72813		Imm (10 h) 4	0.257258	0.0700266	0.272204		Imm (10 h) 4	1.1844	1.20177	1.01466		Imm (10 h) 4	1.1844	0.70747	0.597322
Imm (10 h) 5	0.366258	1.49604	4.08466		Imm (10 h) 5	0.494522	0.623951	1.26173		Imm (10 h) 5	0.366258	0.816137	2.22831		Imm (10 h) 5	0.366258	0.167212	0.456542		Imm (10 h) 5	1.10958	1.22398	1.1031		Imm (10 h) 5	1.10958	0.69863	0.629632
Imm (10 h) 6	0.271277	1.10542	4.07488		Imm (10 h) 6	0.628003	0.99973	1.59192		Imm (10 h) 6	0.271277	0.810188	2.98657		Imm (10 h) 6	0.271277	0.120409	0.44386		Imm (10 h) 6	0.795234	0.918425	1.15491		Imm (10 h) 6	0.795234	0.530813	0.667492
Imm (24 h) 1	0.422701	0.663418	1.56947		Imm (24 h) 1	0.422701	0.328193	0.776418		Imm (24 h) 1	0.422701	0.540332	1.27828		Imm (24 h) 1	0.422701	0.220953	0.522716		Imm (24 h) 1	0.24077	0.443859	1.8435		Imm (24 h) 1	0.24077	0.488598	2.02932
Imm (24 h) 2	0.265282	0.3554	1.33971		Imm (24 h) 2	0.265282	0.377713	1.42382		Imm (24 h) 2	0.265282	0.386823	1.45816		Imm (24 h) 2	0.265282	0.306164	1.15411		Imm (24 h) 2	0.205131	0.3579	1.74474		Imm (24 h) 2	0.205131	0.340757	1.66117
Imm (24 h) 3	0.465685	1.01689	2.18365		Imm (24 h) 3	0.465685	0.273289	0.586854		Imm (24 h) 3	0.465685	0.971848	2.08692		Imm (24 h) 3	0.465685	0.467467	1.00383		Imm (24 h) 3	0.223243	0.692031	3.09991		Imm (24 h) 3	0.223243	0.73263	3.28177
Imm (24 h) 4	0.229763	0.650236	2.83003		Imm (24 h) 4	0.229763	0.992491	4.31963		Imm (24 h) 4	0.229763	0.545858	2.37575		Imm (24 h) 4	0.229763	0.394084	1.71518		Imm (24 h) 4	0.174767	0.477829	2.73409		Imm (24 h) 4	0.174767	0.308335	1.76426
Imm (24 h) 5	0.414387	0.917256	2.21352		Imm (24 h) 5	0.414387	0.70006	1.68938		Imm (24 h) 5	0.414387	0.432485	1.04367		Imm (24 h) 5	0.414387	0.300681	0.725604		Imm (24 h) 5	0.292428	0.446496	1.52686		Imm (24 h) 5	0.292428	0.405267	1.38587
Imm (24 h) 6	0.270824	0.641393	2.3683		Imm (24 h) 6	0.270824	0.289655	1.06953		Imm (24 h) 6	0.270824	0.270541	0.998953		Imm (24 h) 6	0.270824	0.266013	0.982234		Imm (24 h) 6	0.234715	0.154709	0.659138		Imm (24 h) 6	0.234715	0.154078	0.65645
Imm (day 3) 1	0.345657	0.250557	0.724874		Imm (day 3) 1	0.345657	0.514322	1.48796		Imm (day 3) 1	0.345657	0.435645	1.26034		Imm (day 3) 1	0.345657	0.306356	0.886302		Imm (day 3) 1	0.227392	0.601046	2.64321		Imm (day 3) 1	0.227392	0.567259	2.49463
Imm (day 3) 2	0.535394	0.192722	0.359962		Imm (day 3) 2	0.535394	0.248979	0.465039		Imm (day 3) 2	0.535394	0.40812	0.762278		Imm (day 3) 2	0.535394	0.223373	0.417211		Imm (day 3) 2	0.289088	0.236196	0.817037		Imm (day 3) 2	0.289088	0.378374	1.30885
Imm (day 3) 3	0.327061	0.298577	0.912909		Imm (day 3) 3	0.327061	0.262066	0.801276		Imm (day 3) 3	0.327061	0.364782	1.11533		Imm (day 3) 3	0.327061	0.247244	0.755957		Imm (day 3) 3	0.236422	0.354643	1.50005		Imm (day 3) 3	0.236422	0.446902	1.89027
Imm (day 3) 4	0.463695	0.487271	1.05085		Imm (day 3) 4	0.463695	0.474809	1.02397		Imm (day 3) 4	0.463695	0.369776	0.797456		Imm (day 3) 4	0.463695	0.330918	0.713656		Imm (day 3) 4	0.35477	0.330287	0.930989		Imm (day 3) 4	0.35477	0.292611	0.824791
Imm (day 3) 5	0.335634	0.844199	2.51524		Imm (day 3) 5	0.335634	0.196134	0.584369		Imm (day 3) 5	0.335634	0.506083	1.50784		Imm (day 3) 5	0.335634	0.226492	0.674817		Imm (day 3) 5	0.332029	0.784281	2.36208		Imm (day 3) 5	0.332029	0.517175	1.55762
Imm (day 3) 6	0.414173	0.851343	2.05552		Imm (day 3) 6	0.414173	0.248138	0.599116		Imm (day 3) 6	0.414173	0.448112	1.08194		Imm (day 3) 6	0.414173	0.245481	0.592702		Imm (day 3) 6	0.393706	0.373432	0.948506		Imm (day 3) 6	0.393706	0.481719	1.22355
Imm (day 5) 1	0.67022	0.499791	0.745712		Imm (day 5) 1	0.67022	0.467379	0.697352		Imm (day 5) 1	0.67022	0.599589	0.894615		Imm (day 5) 1	0.67022	0.35292	0.526573		Imm (day 5) 1	0.562003	0.561443	0.999003		Imm (day 5) 1	0.562003	0.772593	1.37471
Imm (day 5) 2	0.546253	0.286482	0.524449		Imm (day 5) 2	0.546253	0.24591	0.450176		Imm (day 5) 2	0.546253	0.29967	0.548593		Imm (day 5) 2	0.546253	0.33507	0.613397		Imm (day 5) 2	0.368991	0.15056	0.408033		Imm (day 5) 2	0.368991	0.249197	0.675348
Imm (day 5) 3	0.47445	0.359378	0.757462		Imm (day 5) 3	0.47445	0.365319	0.769984		Imm (day 5) 3	0.47445	0.392731	0.827761		Imm (day 5) 3	0.47445	0.273985	0.577479		Imm (day 5) 3	0.297918	0.259577	0.871303		Imm (day 5) 3	0.297918	0.375274	1.25966
Imm (day 5) 4	0.367195	0.418726	1.14034		Imm (day 5) 4	0.367195	0.260281	0.708837		Imm (day 5) 4	0.367195	0.221248	0.602535		Imm (day 5) 4	0.367195	0.30981	0.843723		Imm (day 5) 4	0.2976	0.179026	0.601567		Imm (day 5) 4	0.2976	0.273835	0.920143
Imm (day 5) 5	0.486572	0.3528	0.725072		Imm (day 5) 5	0.486572	0.328386	0.674897		Imm (day 5) 5	0.486572	0.348938	0.717136		Imm (day 5) 5	0.486572	0.189904	0.390288		Imm (day 5) 5	0.268914	0.399789	1.48668		Imm (day 5) 5	0.268914	0.355498	1.32198
Imm (day 5) 6	0.584898	0.518852	0.887082		Imm (day 5) 6	0.584898	0.417119	0.713149		Imm (day 5) 6	0.584898	0.491271	0.839927		Imm (day 5) 6	0.584898	0.491123	0.839673		Imm (day 5) 6	0.51714	0.43559	0.842306		Imm (day 5) 6	0.51714	0.485066	0.937978
Imm (day 7) 1	0.637207	1.0004	1.56997		Imm (day 7) 1	0.637207	0.909723	1.42767		Imm (day 7) 1	0.637207	0.431624	0.677369		Imm (day 7) 1	0.637207	0.610268	0.957723		Imm (day 7) 1	0.589294	0.775205	1.31548		Imm (day 7) 1	0.589294	0.681849	1.15706
Imm (day 7) 2	0.474437	0.558362	1.17689		Imm (day 7) 2	0.474437	0.286272	0.603393		Imm (day 7) 2	0.474437	0.428786	0.903778		Imm (day 7) 2	0.474437	0.213587	0.45019		Imm (day 7) 2	0.375203	0.412039	1.09818		Imm (day 7) 2	0.375203	0.545219	1.45313
Imm (day 7) 3	0.408755	0.253418	0.619977		Imm (day 7) 3	0.408755	0.385198	0.942369		Imm (day 7) 3	0.408755	0.374752	0.916815		Imm (day 7) 3	0.408755	0.0902854	0.220879		Imm (day 7) 3	0.334656	0.282877	0.845279		Imm (day 7) 3	0.334656	0.454916	1.35936
																				Gypsum (day 7) 4	0.517924	0.741763	1.43219		Gypsum (day 7) 4	0.517924	0.620392	1.19784

## Sheet: S1I-M
(I–M) RT and real-time PCR analysis of gene expression for SLC1A5, SLC7A5, SLC38A2, SLC43A1, and BCKHDA, respectively, in the liver of control mice or mice subjected to bilateral cast immobilization for the indicated times (n = 6 per group).
	Gapdh	Slc1a5	Slc1a5/Gapdh			Gapdh	Slc7a5	Slc7a5/Gapdh			Gapdh	Slc38a2	Slc38a2/Gapdh			Gapdh	Slc43a1	Slc43a1/Gapdh			Gapdh	Bckdha	Bckdha/Gapdh
Control 1	0.409913	0.470547	1.14792		Control 1	0.409913	0.35589	0.868209		Control 1	0.409913	0.273643	0.667565		Control 1	0.409913	0.315835	0.770495		Control 1	0.409913	0.276132	0.673637
Control 2	0.581773	1.07837	1.85359		Control 2	0.581773	0.411513	0.707343		Control 2	0.581773	0.524876	0.9022		Control 2	0.581773	0.972558	1.67171		Control 2	0.581773	0.429056	0.737498
Control 3	0.381727	0.0877549	0.22989		Control 3	0.381727	0.291947	0.764807		Control 3	0.381727	0.307033	0.804327		Control 3	0.381727	0.211012	0.552784		Control 3	0.381727	0.152621	0.399816
Control 4	0.348952	0.337078	0.965975		Control 4	0.348952	0.202878	0.581394		Control 4	0.348952	0.263018	0.753739		Control 4	0.348952	0.255841	0.733171		Control 4	0.348952	0.287925	0.825114
Control 5	0.327805	0.391635	1.19472		Control 5	0.327805	0.211593	0.645485		Control 5	0.327805	0.362515	1.10588		Control 5	0.327805	0.300978	0.91816		Control 5	0.327805	0.344794	1.05183
Control 6	0.369175	0.186922	0.506324		Control 6	0.369175	0.20939	0.567185		Control 6	0.369175	0.408502	1.10653		Control 6	0.369175	0.32358	0.876495		Control 6	0.369175	0.451853	1.22395
Imm (10 h) 1	0.515985	0.369096	0.715324		Imm (10 h) 1	0.515985	0.261797	0.507373		Imm (10 h) 1	0.515985	0.478956	0.928237		Imm (10 h) 1	0.515985	0.371144	0.719292		Imm (10 h) 1	0.515985	0.346886	0.67228
Imm (10 h) 2	0.412407	0.383885	0.930839		Imm (10 h) 2	0.412407	0.218516	0.529855		Imm (10 h) 2	0.412407	0.489287	1.18642		Imm (10 h) 2	0.412407	0.449719	1.09047		Imm (10 h) 2	0.412407	0.328459	0.796444
Imm (10 h) 3	0.423172	0.695971	1.64465		Imm (10 h) 3	0.423172	0.372105	0.879322		Imm (10 h) 3	0.423172	0.484663	1.14531		Imm (10 h) 3	0.423172	0.688176	1.62623		Imm (10 h) 3	0.423172	0.382882	0.904789
Imm (10 h) 4	0.756738	0.661031	0.873527		Imm (10 h) 4	0.756738	0.347668	0.45943		Imm (10 h) 4	0.756738	0.544461	0.719485		Imm (10 h) 4	0.756738	0.423584	0.559751		Imm (10 h) 4	0.756738	0.424646	0.561154
Imm (10 h) 5	0.437532	0.598227	1.36728		Imm (10 h) 5	0.437532	0.330141	0.754553		Imm (10 h) 5	0.437532	0.392743	0.897632		Imm (10 h) 5	0.437532	0.276325	0.631553		Imm (10 h) 5	0.437532	0.217213	0.496452
Imm (10 h) 6	0.433606	0.407025	0.938699		Imm (10 h) 6	0.433606	0.329718	0.760411		Imm (10 h) 6	0.433606	0.483845	1.11586		Imm (10 h) 6	0.433606	0.475687	1.09705		Imm (10 h) 6	0.433606	0.31844	0.7344
Imm (24 h) 1	0.443826	0.603925	1.36072		Imm (24 h) 1	0.443826	0.335802	0.756607		Imm (24 h) 1	0.443826	0.389466	0.87752		Imm (24 h) 1	0.443826	0.365501	0.823522		Imm (24 h) 1	0.443826	0.310492	0.699581
Imm (24 h) 2	0.541398	0.731685	1.35147		Imm (24 h) 2	0.541398	0.276731	0.511141		Imm (24 h) 2	0.541398	0.629314	1.16239		Imm (24 h) 2	0.541398	0.621016	1.14706		Imm (24 h) 2	0.541398	0.474876	0.877129
Imm (24 h) 3	0.461045	0.180567	0.391647		Imm (24 h) 3	0.461045	0.193449	0.419588		Imm (24 h) 3	0.461045	0.137109	0.297387		Imm (24 h) 3	0.461045	0.397094	0.86129		Imm (24 h) 3	0.461045	0.149354	0.323948
Imm (24 h) 4	0.305194	0.876028	2.87039		Imm (24 h) 4	0.305194	0.139393	0.456736		Imm (24 h) 4	0.305194	0.377446	1.23674		Imm (24 h) 4	0.305194	0.145305	0.476107		Imm (24 h) 4	0.305194	0.14665	0.480513
Imm (24 h) 5	0.43497	0.463275	1.06507		Imm (24 h) 5	0.43497	0.278048	0.639235		Imm (24 h) 5	0.43497	0.29922	0.687909		Imm (24 h) 5	0.43497	0.364909	0.83893		Imm (24 h) 5	0.43497	0.241419	0.555024
Imm (24 h) 6	0.459925	0.0882022	0.191775		Imm (24 h) 6	0.459925	0.174388	0.379166		Imm (24 h) 6	0.459925	0.252904	0.549881		Imm (24 h) 6	0.459925	0.223336	0.485592		Imm (24 h) 6	0.459925	0.125613	0.273117
Imm (day 3) 1	0.496016	0.319129	0.643383		Imm (day 3) 1	0.496016	0.194734	0.392596		Imm (day 3) 1	0.496016	0.206598	0.416515		Imm (day 3) 1	0.496016	0.435333	0.877659		Imm (day 3) 1	0.496016	0.30338	0.611633
Imm (day 3) 2	0.403984	0.283247	0.701135		Imm (day 3) 2	0.403984	0.228726	0.566177		Imm (day 3) 2	0.403984	0.391856	0.96998		Imm (day 3) 2	0.403984	0.460682	1.14035		Imm (day 3) 2	0.403984	0.382166	0.945993
Imm (day 3) 3	0.55476	0.504139	0.908751		Imm (day 3) 3	0.55476	0.340307	0.613432		Imm (day 3) 3	0.55476	0.597663	1.07734		Imm (day 3) 3	0.55476	0.646062	1.16458		Imm (day 3) 3	0.55476	0.461916	0.832641
Imm (day 3) 4	0.390893	0.234973	0.60112		Imm (day 3) 4	0.390893	0.136438	0.349043		Imm (day 3) 4	0.390893	0.436917	1.11774		Imm (day 3) 4	0.390893	0.218752	0.55962		Imm (day 3) 4	0.390893	0.187515	0.479709
Imm (day 3) 5	0.408483	0.289933	0.709779		Imm (day 3) 5	0.408483	0.0554476	0.13574		Imm (day 3) 5	0.408483	0.230442	0.56414		Imm (day 3) 5	0.408483	0.252377	0.617838		Imm (day 3) 5	0.408483	0.225987	0.553233
Imm (day 3) 6	0.568773	0.428182	0.752817		Imm (day 3) 6	0.568773	0.339115	0.596223		Imm (day 3) 6	0.568773	0.230665	0.405548		Imm (day 3) 6	0.568773	0.362724	0.637731		Imm (day 3) 6	0.568773	0.264013	0.464179
Imm (day 5) 1	0.49973	0.619898	1.24047		Imm (day 5) 1	0.49973	0.476441	0.953397		Imm (day 5) 1	0.49973	0.561691	1.12399		Imm (day 5) 1	0.49973	0.421229	0.842913		Imm (day 5) 1	0.49973	0.525177	1.05092
Imm (day 5) 2	0.526762	0.506377	0.961301		Imm (day 5) 2	0.526762	0.642284	1.21931		Imm (day 5) 2	0.526762	1.36928	2.59943		Imm (day 5) 2	0.526762	0.5865	1.11341		Imm (day 5) 2	0.526762	1.05183	1.99678
Imm (day 5) 3	0.449816	0.678924	1.50934		Imm (day 5) 3	0.449816	0.335849	0.746638		Imm (day 5) 3	0.449816	0.786719	1.74898		Imm (day 5) 3	0.449816	0.721494	1.60398		Imm (day 5) 3	0.449816	0.577392	1.28362
Imm (day 5) 4	0.403226	0.54881	1.36105		Imm (day 5) 4	0.403226	0.652465	1.61811		Imm (day 5) 4	0.403226	0.931939	2.31121		Imm (day 5) 4	0.403226	0.818213	2.02917		Imm (day 5) 4	0.403226	0.639274	1.5854
Imm (day 5) 5	0.443253	0.550372	1.24167		Imm (day 5) 5	0.443253	0.541577	1.22182		Imm (day 5) 5	0.443253	0.96637	2.18018		Imm (day 5) 5	0.443253	0.536095	1.20946		Imm (day 5) 5	0.443253	0.738476	1.66604
Imm (day 5) 6	0.52959	0.463851	0.875868		Imm (day 5) 6	0.52959	0.425069	0.802638		Imm (day 5) 6	0.52959	0.904172	1.70731		Imm (day 5) 6	0.52959	0.738038	1.3936		Imm (day 5) 6	0.52959	0.855687	1.61575
Imm (day 7) 1	0.471039	0.869336	1.84557		Imm (day 7) 1	0.471039	0.355451	0.754611		Imm (day 7) 1	0.471039	0.389965	0.827882		Imm (day 7) 1	0.471039	0.867673	1.84204		Imm (day 7) 1	0.471039	0.528092	1.12112
Imm (day 7) 2	0.411731	0.394366	0.957824		Imm (day 7) 2	0.411731	0.902403	2.19173		Imm (day 7) 2	0.411731	0.597229	1.45053		Imm (day 7) 2	0.411731	0.689941	1.67571		Imm (day 7) 2	0.411731	0.671371	1.63061
Imm (day 7) 3	0.546094	0.566352	1.0371		Imm (day 7) 3	0.546094	0.565885	1.03624		Imm (day 7) 3	0.546094	0.711644	1.30315		Imm (day 7) 3	0.546094	0.817222	1.49649		Imm (day 7) 3	0.546094	0.722953	1.32386
Gypsum (day 7) 4	0.343222	0.265679	0.774073		Gypsum (day 7) 4	0.343222	0.360881	1.05145		Gypsum (day 7) 4	0.343222	0.356103	1.03753		Gypsum (day 7) 4	0.343222	0.211911	0.617418		Gypsum (day 7) 4	0.343222	0.26672	0.777105
Gypsum (day 7) 5	0.527314	0.419512	0.795564		Gypsum (day 7) 5	0.527314	0.646586	1.22619		Gypsum (day 7) 5	0.527314	0.714574	1.35512		Gypsum (day 7) 5	0.527314	0.790898	1.49986		Gypsum (day 7) 5	0.527314	0.676029	1.28202
Gypsum (day 7) 6	0.746381	0.465682	0.62392		Gypsum (day 7) 6	0.746381	0.339211	0.454474		Gypsum (day 7) 6	0.746381	0.343285	0.459932		Gypsum (day 7) 6	0.746381	0.729475	0.977349		Gypsum (day 7) 6	0.746381	0.468881	0.628205

## Sheet: S1N-S
(N–S) RT and real-time PCR analysis of gene expression for SLC1A5, SLC7A5, SLC38A2, SLC43A1, BCAT2, and BCKHDA in soleus of control mice or mice subjected to bilateral cast immobilization for the indicated times (n = 6 per group).
	Gapdh	Slc1a5	Slc1a5/Gapdh			Gapdh	Slc7a5	Slc7a5/Gapdh			Gapdh	Slc38a2	Slc38a2/Gapdh			Gapdh	Slc43a1	Slc43a1/Gapdh			Gapdh	Bcat2	Bcat2/Gapdh			Gapdh	Bckdha	Bckdha/Gapdh
Control 1	0.0460839	0.200695	4.355		Control 1	0.0460839	0.100943	2.19042		Control 1	0.0460839	0.276433	5.99847		Control 1	0.0460839	0.0826674	1.79384		Control 1	0.0460839	0.111641	2.42257		Control 1	0.0460839	0.108006	2.34368
Control 2	0.0654096	0.266022	4.06702		Control 2	0.0654096	0.125757	1.92261		Control 2	0.0654096	0.381	5.82484		Control 2	0.0654096	0.0691048	1.05649		Control 2	0.0654096	0.193063	2.9516		Control 2	0.0654096	0.159844	2.44374
Control 3	0.0654427	0.330088	5.04391		Control 3	0.0654427	0.147644	2.25608		Control 3	0.0654427	0.304468	4.65244		Control 3	0.0654427	0.0773985	1.18269		Control 3	0.0654427	0.293581	4.48607		Control 3	0.0654427	0.170146	2.59992
Control 4	0.0286143	0.27734	9.69237		Control 4	0.0286143	0.125084	4.37139		Control 4	0.0286143	0.205167	7.17008		Control 4	0.0286143	0.0854241	2.98536		Control 4	0.0286143	0.210178	7.34521		Control 4	0.0286143	0.148149	5.17745
Control 5	0.10042	0.349494	3.48034		Control 5	0.10042	0.163159	1.62477		Control 5	0.10042	0.330024	3.28644		Control 5	0.10042	0.0657901	0.655152		Control 5	0.10042	0.317975	3.16646		Control 5	0.10042	0.1945	1.93687
Control 6	0.0809185	0.459788	5.68211		Control 6	0.0809185	0.219489	2.71247		Control 6	0.0809185	0.253841	3.137		Control 6	0.0809185	0.0981158	1.21253		Control 6	0.0809185	0.258442	3.19385		Control 6	0.0809185	0.157738	1.94934
Imm (10 h) 1	0.0798282	0.319322	4.00012		Imm (10 h) 1	0.0798282	0.163337	2.04611		Imm (10 h) 1	0.0798282	0.149484	1.87257		Imm (10 h) 1	0.0798282	0.160084	2.00536		Imm (10 h) 1	0.0798282	0.235092	2.94498		Imm (10 h) 1	0.0798282	0.16563	2.07483
Imm (10 h) 2	0.0555835	0.243379	4.37862		Imm (10 h) 2	0.0555835	0.157783	2.83866		Imm (10 h) 2	0.0555835	0.132778	2.3888		Imm (10 h) 2	0.0555835	0.151274	2.72155		Imm (10 h) 2	0.0555835	0.144764	2.60445		Imm (10 h) 2	0.0555835	0.138763	2.49647
Imm (10 h) 3	0.0559666	0.220832	3.94578		Imm (10 h) 3	0.0559666	0.146783	2.6227		Imm (10 h) 3	0.0559666	0.106915	1.91034		Imm (10 h) 3	0.0559666	0.187506	3.35032		Imm (10 h) 3	0.0559666	0.175297	3.13217		Imm (10 h) 3	0.0559666	0.175089	3.12845
Imm (10 h) 4	0.0798931	0.24635	3.0835		Imm (10 h) 4	0.0798931	0.159651	1.9983		Imm (10 h) 4	0.0798931	0.16466	2.061		Imm (10 h) 4	0.0798931	0.149433	1.87041		Imm (10 h) 4	0.0798931	0.280172	3.50684		Imm (10 h) 4	0.0798931	0.219135	2.74285
Imm (10 h) 5	0.0703076	0.37981	5.40212		Imm (10 h) 5	0.0703076	0.15646	2.22536		Imm (10 h) 5	0.0703076	0.148957	2.11865		Imm (10 h) 5	0.0703076	0.22233	3.16225		Imm (10 h) 5	0.0703076	0.298396	4.24415		Imm (10 h) 5	0.0703076	0.191338	2.72144
Imm (10 h) 6	0.0452364	0.196278	4.33894		Imm (10 h) 6	0.0452364	0.127487	2.81824		Imm (10 h) 6	0.0452364	0.095114	2.1026		Imm (10 h) 6	0.0452364	0.161361	3.56705		Imm (10 h) 6	0.0452364	0.226151	4.99932		Imm (10 h) 6	0.0452364	0.128055	2.8308
Imm (24 h) 1	0.058617	0.224452	3.82913		Imm (24 h) 1	0.058617	0.120485	2.05546		Imm (24 h) 1	0.058617	0.22886	3.90433		Imm (24 h) 1	0.058617	0.298576	5.09367		Imm (24 h) 1	0.058617	0.214896	3.6661		Imm (24 h) 1	0.058617	0.229091	3.90827
Imm (24 h) 2	0.0505273	0.235314	4.65717		Imm (24 h) 2	0.0505273	0.124645	2.46689		Imm (24 h) 2	0.0505273	0.147452	2.91826		Imm (24 h) 2	0.0505273	0.271605	5.37541		Imm (24 h) 2	0.0505273	0.165132	3.26818		Imm (24 h) 2	0.0505273	0.160077	3.16812
Imm (24 h) 3	0.0484644	0.135434	2.7945		Imm (24 h) 3	0.0484644	0.0890332	1.83708		Imm (24 h) 3	0.0484644	0.125944	2.59869		Imm (24 h) 3	0.0484644	0.318052	6.5626		Imm (24 h) 3	0.0484644	0.146638	3.02568		Imm (24 h) 3	0.0484644	0.153423	3.16569
Imm (24 h) 4	0.05498	0.23919	4.35048		Imm (24 h) 4	0.05498	0.216976	3.94644		Imm (24 h) 4	0.05498	0.204408	3.71786		Imm (24 h) 4	0.05498	0.278173	5.05952		Imm (24 h) 4	0.05498	0.257102	4.67628		Imm (24 h) 4	0.05498	0.229861	4.18081
Imm (24 h) 5	0.0397523	0.111072	2.79409		Imm (24 h) 5	0.0397523	0.0967508	2.43384		Imm (24 h) 5	0.0397523	0.0889502	2.23761		Imm (24 h) 5	0.0397523	0.259732	6.53377		Imm (24 h) 5	0.0397523	0.109325	2.75015		Imm (24 h) 5	0.0397523	0.123274	3.10106
Imm (24 h) 6	0.0623451	0.129045	2.06984		Imm (24 h) 6	0.0623451	0.107982	1.73201		Imm (24 h) 6	0.0623451	0.134097	2.15089		Imm (24 h) 6	0.0623451	0.407772	6.54056		Imm (24 h) 6	0.0623451	0.150024	2.40635		Imm (24 h) 6	0.0623451	0.153856	2.46782
Imm (day 3) 1	0.0489579	0.168805	3.44796		Imm (day 3) 1	0.0489579	0.109164	2.22976		Imm (day 3) 1	0.0489579	0.0694778	1.41913		Imm (day 3) 1	0.0489579	0.281091	5.74149		Imm (day 3) 1	0.0489579	0.213426	4.35938		Imm (day 3) 1	0.0489579	0.186311	3.80554
Imm (day 3) 2	0.0720743	0.397736	5.51841		Imm (day 3) 2	0.0720743	0.118869	1.64925		Imm (day 3) 2	0.0720743	0.155979	2.16415		Imm (day 3) 2	0.0720743	0.102168	1.41753		Imm (day 3) 2	0.0720743	0.190373	2.64135		Imm (day 3) 2	0.0720743	0.19334	2.68251
Imm (day 3) 3	0.0517	0.0966798	1.87002		Imm (day 3) 3	0.0517	0.119808	2.31737		Imm (day 3) 3	0.0517	0.102265	1.97804		Imm (day 3) 3	0.0517	0.0874272	1.69105		Imm (day 3) 3	0.0517	0.144315	2.79139		Imm (day 3) 3	0.0517	0.164539	3.18257
Imm (day 3) 4	0.0657859	0.180866	2.74931		Imm (day 3) 4	0.0657859	0.13206	2.00742		Imm (day 3) 4	0.0657859	0.10357	1.57435		Imm (day 3) 4	0.0657859	0.216872	3.29663		Imm (day 3) 4	0.0657859	0.220148	3.34643		Imm (day 3) 4	0.0657859	0.239652	3.64291
Imm (day 3) 5	0.0578573	0.168977	2.92058		Imm (day 3) 5	0.0578573	0.114215	1.97409		Imm (day 3) 5	0.0578573	0.153817	2.65857		Imm (day 3) 5	0.0578573	0.133717	2.31115		Imm (day 3) 5	0.0578573	0.160273	2.77014		Imm (day 3) 5	0.0578573	0.219653	3.79646
Imm (day 3) 6	0.0623626	0.13709	2.19827		Imm (day 3) 6	0.0623626	0.124836	2.00178		Imm (day 3) 6	0.0623626	0.312366	5.00887		Imm (day 3) 6	0.0623626	0.101584	1.62892		Imm (day 3) 6	0.0623626	0.108109	1.73355		Imm (day 3) 6	0.0623626	0.119504	1.91627
Imm (day 5) 1	0.0555774	0.163239	2.93714		Imm (day 5) 1	0.0555774	0.0830394	1.49412		Imm (day 5) 1	0.0555774	0.100307	1.80482		Imm (day 5) 1	0.0555774	0.192046	3.45547		Imm (day 5) 1	0.0555774	0.157941	2.84182		Imm (day 5) 1	0.0555774	0.192605	3.46554
Imm (day 5) 2	0.0374358	0.0804404	2.14876		Imm (day 5) 2	0.0374358	0.0479243	1.28017		Imm (day 5) 2	0.0374358	0.0419563	1.12075		Imm (day 5) 2	0.0374358	0.165138	4.41124		Imm (day 5) 2	0.0374358	0.110142	2.94217		Imm (day 5) 2	0.0374358	0.0746426	1.99388
Imm (day 5) 3	0.0570156	0.164973	2.89347		Imm (day 5) 3	0.0570156	0.138173	2.42343		Imm (day 5) 3	0.0570156	0.0712086	1.24893		Imm (day 5) 3	0.0570156	0.22386	3.92629		Imm (day 5) 3	0.0570156	0.13454	2.35971		Imm (day 5) 3	0.0570156	0.138093	2.42202
Imm (day 5) 4	0.077816	0.220299	2.83102		Imm (day 5) 4	0.077816	0.0928508	1.19321		Imm (day 5) 4	0.077816	0.0943257	1.21216		Imm (day 5) 4	0.077816	0.229837	2.9536		Imm (day 5) 4	0.077816	0.0957636	1.23064		Imm (day 5) 4	0.077816	0.109413	1.40605
Imm (day 5) 5	0.0681701	0.239566	3.51424		Imm (day 5) 5	0.0681701	0.0645198	0.946453		Imm (day 5) 5	0.0681701	0.0685208	1.00514		Imm (day 5) 5	0.0681701	0.241179	3.5379		Imm (day 5) 5	0.0681701	0.136423	2.00121		Imm (day 5) 5	0.0681701	0.178746	2.62206
Imm (day 5) 6	0.0752484	0.147823	1.96447		Imm (day 5) 6	0.0752484	0.106065	1.40953		Imm (day 5) 6	0.0752484	0.0640606	0.851322		Imm (day 5) 6	0.0752484	0.220629	2.93201		Imm (day 5) 6	0.0752484	0.100699	1.33822		Imm (day 5) 6	0.0752484	0.135429	1.79975
Imm (day 7) 1	0.0651738	0.209269	3.21094		Imm (day 7) 1	0.0651738	0.185882	2.8521		Imm (day 7) 1	0.0651738	0.111406	1.70936		Imm (day 7) 1	0.0651738	0.219228	3.36375		Imm (day 7) 1	0.0651738	0.0586085	0.899264		Imm (day 7) 1	0.0651738	0.0863817	1.3254
Imm (day 7) 2	0.0503187	0.195068	3.87665		Imm (day 7) 2	0.0503187	0.0551782	1.09657		Imm (day 7) 2	0.0503187	0.0601035	1.19446		Imm (day 7) 2	0.0503187	0.191116	3.79812		Imm (day 7) 2	0.0503187	0.0734603	1.4599		Imm (day 7) 2	0.0503187	0.0909767	1.80801
Imm (day 7) 3	0.0991879	0.187385	1.88919		Imm (day 7) 3	0.0991879	0.106548	1.07421		Imm (day 7) 3	0.0991879	0.0914334	0.92182		Imm (day 7) 3	0.0991879	0.196328	1.97935		Imm (day 7) 3	0.0991879	0.0653566	0.658917		Imm (day 7) 3	0.0991879	0.0910091	0.917542
Gypsum (day 7) 4	0.060158	0.0782784	1.30121		Gypsum (day 7) 4	0.060158	0.10952	1.82054		Gypsum (day 7) 4	0.060158	0.0444633	0.739109		Gypsum (day 7) 4	0.060158	0.136436	2.26796		Gypsum (day 7) 4	0.060158	0.0695327	1.15584		Gypsum (day 7) 4	0.060158	0.115389	1.91811
Gypsum (day 7) 5	0.0534683	0.0842319	1.57536		Gypsum (day 7) 5	0.0534683	0.0845101	1.58056		Gypsum (day 7) 5	0.0534683	0.0488872	0.914322		Gypsum (day 7) 5	0.0534683	0.17435	3.2608		Gypsum (day 7) 5	0.0534683	0.0542988	1.01553		Gypsum (day 7) 5	0.0534683	0.121731	2.2767
Gypsum (day 7) 6	0.0558462	0.118964	2.13021		Gypsum (day 7) 6	0.0558462	0.130834	2.34276		Gypsum (day 7) 6	0.0558462	0.380874	6.82005		Gypsum (day 7) 6	0.0558462	0.15867	2.84119		Gypsum (day 7) 6	0.0558462	0.0776155	1.38981		Gypsum (day 7) 6	0.0558462	0.0651783	1.1671

## Sheet: S2A-C
(A–C) RT and real-time PCR analysis of SLC25A44 gene expression in iBAT (A), liver (B), and soleus (C) of control mice or mice subjected to bilateral cast immobilization for the indicated times (n = 6 per group).
iBAT					Liver					Soleus
	Gapdh	Slc25a44	Slc25a44/Gapdh			Gapdh	Slc25a44	Slc25a44/Gapdh			Gapdh	Slc25a44	Slc25a44/Gapdh
Control 1	0.207281	0.379584	1.83126		Control 1	0.409913	0.450544	1.09912		Control 1	0.0460839	0.154527	3.35316
Control 2	0.412877	0.463007	1.12142		Control 2	0.581773	1.88722	3.24391		Control 2	0.0654096	0.199446	3.04919
Control 3	0.554963	0.684988	1.23429		Control 3	0.381727	0.216689	0.567656		Control 3	0.0654427	0.200708	3.06692
Control 4	0.451072	0.64272	1.42487		Control 4	0.348952	0.269163	0.771346		Control 4	0.0286143	0.160977	5.62574
Control 5	0.28611	0.400885	1.40116		Control 5	0.327805	0.33781	1.03052		Control 5	0.10042	0.200207	1.9937
Control 6	0.581126	0.582715	1.00273		Control 6	0.369175	0.711285	1.92669		Control 6	0.0809185	0.237862	2.93952
Imm (10 h) 1	1.21973	0.726847	0.59591		Imm (10 h) 1	0.515985	1.30226	2.52382		Imm (10 h) 1	0.0798282	0.210099	2.63189
Imm (10 h) 2	0.926669	0.580031	0.625932		Imm (10 h) 2	0.412407	0.308212	0.74735		Imm (10 h) 2	0.0555835	0.160947	2.89559
Imm (10 h) 3	1.06919	0.525965	0.491926		Imm (10 h) 3	0.423172	0.447015	1.05634		Imm (10 h) 3	0.0559666	0.167956	3.001
Imm (10 h) 4	1.1844	0.734607	0.620234		Imm (10 h) 4	0.756738	0.355207	0.469392		Imm (10 h) 4	0.0798931	0.220618	2.76141
Imm (10 h) 5	1.10958	0.671386	0.605078		Imm (10 h) 5	0.437532	0.367725	0.840453		Imm (10 h) 5	0.0703076	0.194655	2.76863
Imm (10 h) 6	0.795234	0.445899	0.560714		Imm (10 h) 6	0.433606	0.420542	0.969872		Imm (10 h) 6	0.0452364	0.144167	3.18696
Imm (24 h) 1	0.24077	0.425915	1.76897		Imm (24 h) 1	0.443826	0.203794	0.459175		Imm (24 h) 1	0.058617	0.223436	3.81179
Imm (24 h) 2	0.205131	0.332673	1.62176		Imm (24 h) 2	0.541398	0.219815	0.406014		Imm (24 h) 2	0.0505273	0.142856	2.82729
Imm (24 h) 3	0.223243	0.65016	2.91235		Imm (24 h) 3	0.461045	0.112632	0.244297		Imm (24 h) 3	0.0484644	0.136449	2.81545
Imm (24 h) 4	0.174767	0.509994	2.91814		Imm (24 h) 4	0.305194	0.0967061	0.316867		Imm (24 h) 4	0.05498	0.244703	4.45075
Imm (24 h) 5	0.292428	0.454832	1.55536		Imm (24 h) 5	0.43497	0.209963	0.482707		Imm (24 h) 5	0.0397523	0.122788	3.08881
Imm (24 h) 6	0.234715	0.200884	0.855867		Imm (24 h) 6	0.459925	0.182589	0.396998		Imm (24 h) 6	0.0623451	0.12508	2.00625
Imm (day 3) 1	0.227392	0.436116	1.9179		Imm (day 3) 1	0.496016	0.26944	0.543209		Imm (day 3) 1	0.0489579	0.137947	2.81767
Imm (day 3) 2	0.289088	0.373566	1.29222		Imm (day 3) 2	0.403984	0.646256	1.59971		Imm (day 3) 2	0.0720743	0.205375	2.84949
Imm (day 3) 3	0.236422	0.29401	1.24358		Imm (day 3) 3	0.55476	0.60405	1.08885		Imm (day 3) 3	0.0517	0.169158	3.27191
Imm (day 3) 4	0.35477	0.276698	0.779937		Imm (day 3) 4	0.390893	0.0881077	0.225401		Imm (day 3) 4	0.0657859	0.145395	2.21013
Imm (day 3) 5	0.332029	0.537951	1.62019		Imm (day 3) 5	0.408483	0.295582	0.723609		Imm (day 3) 5	0.0578573	0.188519	3.25834
Imm (day 3) 6	0.393706	0.404396	1.02715		Imm (day 3) 6	0.568773	0.164072	0.288467		Imm (day 3) 6	0.0623626	0.0782241	1.25434
Imm (day 5) 1	0.562003	0.624285	1.11082		Imm (day 5) 1	0.49973	0.151425	0.303014		Imm (day 5) 1	0.0555774	0.150455	2.70713
Imm (day 5) 2	0.368991	0.290296	0.786729		Imm (day 5) 2	0.526762	0.453584	0.861079		Imm (day 5) 2	0.0374358	0.0755306	2.0176
Imm (day 5) 3	0.297918	0.423044	1.42		Imm (day 5) 3	0.449816	0.0765042	0.170079		Imm (day 5) 3	0.0570156	0.0992458	1.74068
Imm (day 5) 4	0.2976	0.296329	0.99573		Imm (day 5) 4	0.403226	0.279976	0.694339		Imm (day 5) 4	0.077816	0.104977	1.34903
Imm (day 5) 5	0.268914	0.310592	1.15499		Imm (day 5) 5	0.443253	0.358565	0.808941		Imm (day 5) 5	0.0681701	0.128484	1.88476
Imm (day 5) 6	0.51714	0.49146	0.950342		Imm (day 5) 6	0.52959	0.777178	1.46751		Imm (day 5) 6	0.0752484	0.115682	1.53734
Imm (day 7) 1	0.589294	0.900981	1.52891		Imm (day 7) 1	0.471039	0.335381	0.712002		Imm (day 7) 1	0.0651738	0.121529	1.8647
Imm (day 7) 2	0.375203	0.538565	1.4354		Imm (day 7) 2	0.411731	0.288949	0.701792		Imm (day 7) 2	0.0503187	0.0873377	1.73569
Imm (day 7) 3	0.334656	0.4216	1.2598		Imm (day 7) 3	0.546094	0.762438	1.39617		Imm (day 7) 3	0.0991879	0.132483	1.33568
Imm (day 7) 4	0.517924	0.791535	1.52829		Imm (day 7) 4	0.343222	0.530761	1.54641		Imm (day 7) 4	0.060158	0.10078	1.67525
Imm (day 7) 5	0.484869	0.549408	1.13311		Imm (day 7) 5	0.527314	0.743399	1.40979		Imm (day 7) 5	0.0534683	0.133082	2.48899
Imm (day 7) 6	0.34452	0.436393	1.26667		Imm (day 7) 6	0.746381	0.300274	0.402306		Imm (day 7) 6	0.0558462	0.104132	1.86463

## Sheet: S2D-J
(D-J) RT and real-time PCR analysis of gene expression for SLC25A44, SLC1A5, SLC7A5, SLC38A2, SLC43A1, BCAT2, and BCKDHA, respectively, in denervated iBAT of control mice or mice subjected to bilateral cast immobilization for the indicated times (n = 4–6 per group).
	Gapdh	Slc25a44	Slc25a44/Gapdh			Gapdh	Slc1a5	Slc1a5/Gapdh			Gapdh	Slc7a5	Slc7a5/Gapdh			Gapdh	Slc38a2	Slc38a2/Gapdh			Gapdh	Slc43a1	Slc43a1/Gapdh			Gapdh	Bcat2	Bcat2/Gapdh			Gapdh	Bckdha	Bckdha/Gapdh
Control 1	0.262081	0.0448363	0.171078		Control 1	0.262081	0.0963156	0.367503		Control 1	0.262081	0.320443	1.22269		Control 1	0.262081	0.172365	0.65768		Control 1	0.262081	0.320443	1.22269		Control 1	0.262081	0.0410683	0.156701		Control 1	0.262081	0.02633	0.100465
Control 2	0.934129	0.0859647	0.0920266		Control 2	0.934129	0.211301	0.226201		Control 2	0.934129	0.462141	0.494729		Control 2	0.934129	0.334522	0.358112		Control 2	0.934129	0.462141	0.494729		Control 2	0.934129	0.098569	0.10552		Control 2	0.934129	0.0586351	0.0627699
Control 3	0.428044	0.0447931	0.104646		Control 3	0.428044	0.153729	0.359143		Control 3	0.428044	0.192109	0.448806		Control 3	0.428044	0.215726	0.50398		Control 3	0.428044	0.192109	0.448806		Control 3	0.428044	0.0365941	0.0854915		Control 3	0.428044	0.029705	0.0693971
Control 4	0.765061	0.0364305	0.0476177		Control 4	0.765061	0.121766	0.159159		Control 4	0.765061	0.176695	0.230955		Control 4	0.765061	0.348365	0.455343		Control 4	0.765061	0.176695	0.230955		Control 4	0.765061	0.0290529	0.0379747		Control 4	0.765061	0.0237938	0.0311005
Control 5	0.848056	0.0750814	0.0885335		Control 5	0.848056	0.126875	0.149607		Control 5	0.848056	0.447986	0.52825		Control 5	0.848056	0.359031	0.423357		Control 5	0.848056	0.447986	0.52825		Control 5	0.848056	0.0923936	0.108948		Control 5	0.848056	0.049908	0.0588498
Control 6	0.671164	0.047237	0.0703808		Control 6	0.671164	0.0792028	0.118008		Control 6	0.671164	0.93449	1.39234		Control 6	0.671164	0.317031	0.47236		Control 6	0.671164	0.93449	1.39234		Control 6	0.671164	0.0324573	0.0483597		Control 6	0.671164	0.0195484	0.0291262
Imm (10 h) 1	0.461601	0.118872	0.257522		Imm (10 h) 1	0.461601	0.25328	0.5487		Imm (10 h) 1	0.461601	0.41421	0.897334		Imm (10 h) 1	0.461601	0.271061	0.587221		Imm (10 h) 1	0.461601	0.41421	0.897334		Imm (10 h) 1	0.461601	0.0943934	0.204492		Imm (10 h) 1	0.461601	0.0783198	0.16967
Imm (10 h) 2	0.762223	0.0830696	0.108983		Imm (10 h) 2	0.762223	0.0820732	0.107676		Imm (10 h) 2	0.762223	1.41771	1.85996		Imm (10 h) 2	0.762223	0.355049	0.465807		Imm (10 h) 2	0.762223	1.41771	1.85996		Imm (10 h) 2	0.762223	0.103467	0.135744		Imm (10 h) 2	0.762223	0.0679431	0.089138
Imm (10 h) 3	1.05269	0.177536	0.168649		Imm (10 h) 3	1.05269	0.335346	0.31856		Imm (10 h) 3	1.05269	0.378052	0.359128		Imm (10 h) 3	1.05269	0.442234	0.420098		Imm (10 h) 3	1.05269	0.378052	0.359128		Imm (10 h) 3	1.05269	0.128967	0.122512		Imm (10 h) 3	1.05269	0.108213	0.102796
Imm (10 h) 4	1.31814	0.224462	0.170287		Imm (10 h) 4	1.31814	0.512304	0.388657		Imm (10 h) 4	1.31814	0.654949	0.496874		Imm (10 h) 4	1.31814	0.516888	0.392135		Imm (10 h) 4	1.31814	0.654949	0.496874		Imm (10 h) 4	1.31814	0.208826	0.158425		Imm (10 h) 4	1.31814	0.146235	0.110941
Imm (10 h) 5	0.769793	0.185264	0.240668		Imm (10 h) 5	0.769793	0.311324	0.404425		Imm (10 h) 5	0.769793	0.363828	0.472631		Imm (10 h) 5	0.769793	0.446581	0.580131		Imm (10 h) 5	0.769793	0.363828	0.472631		Imm (10 h) 5	0.769793	0.102752	0.13348		Imm (10 h) 5	0.769793	0.0912681	0.118562
Imm (10 h) 6	0.902296	0.246421	0.273105		Imm (10 h) 6	0.902296	0.357668	0.396398		Imm (10 h) 6	0.902296	0.293156	0.3249		Imm (10 h) 6	0.902296	0.429572	0.476087		Imm (10 h) 6	0.902296	0.293156	0.3249		Imm (10 h) 6	0.902296	0.225232	0.249621		Imm (10 h) 6	0.902296	0.157579	0.174642
Imm (24 h) 1	1.07445	0.0275827	0.0256714		Imm (24 h) 1	1.07445	0.05163	0.0480523		Imm (24 h) 1	1.07445	0.191448	0.178182		Imm (24 h) 1	1.07445	0.247065	0.229945		Imm (24 h) 1	1.07445	0.191448	0.178182		Imm (24 h) 1	1.07445	0.0280039	0.0260634		Imm (24 h) 1	1.07445	0.0179409	0.0166976
Imm (24 h) 2	0.941938	0.0873428	0.0927267		Imm (24 h) 2	0.941938	0.241344	0.256221		Imm (24 h) 2	0.941938	0.493341	0.523751		Imm (24 h) 2	0.941938	0.332618	0.353121		Imm (24 h) 2	0.941938	0.493341	0.523751		Imm (24 h) 2	0.941938	0.151732	0.161085		Imm (24 h) 2	0.941938	0.086385	0.0917098
Imm (24 h) 3	0.903466	0.0649722	0.0719144		Imm (24 h) 3	0.903466	0.15865	0.175601		Imm (24 h) 3	0.903466	0.210879	0.233411		Imm (24 h) 3	0.903466	0.28774	0.318485		Imm (24 h) 3	0.903466	0.210879	0.233411		Imm (24 h) 3	0.903466	0.0454044	0.0502559		Imm (24 h) 3	0.903466	0.0424361	0.0469704
Imm (24 h) 4	0.79767	0.1003	0.125741		Imm (24 h) 4	0.79767	0.355654	0.445866		Imm (24 h) 4	0.79767	0.477245	0.598298		Imm (24 h) 4	0.79767	0.419576	0.526001		Imm (24 h) 4	0.79767	0.477245	0.598298		Imm (24 h) 4	0.79767	0.125216	0.156977		Imm (24 h) 4	0.79767	0.0457288	0.0573279
Imm (24 h) 5	1.36922	0.122557	0.0895084		Imm (24 h) 5	1.36922	0.281525	0.20561		Imm (24 h) 5	1.36922	0.645258	0.47126		Imm (24 h) 5	1.36922	0.446989	0.326455		Imm (24 h) 5	1.36922	0.645258	0.47126		Imm (24 h) 5	1.36922	0.106349	0.0776715		Imm (24 h) 5	1.36922	0.0567284	0.0414312
Imm (24 h) 6	0.346296	0.139799	0.403698		Imm (24 h) 6	0.346296	0.174218	0.50309		Imm (24 h) 6	0.346296	0.639466	1.84659		Imm (24 h) 6	0.346296	0.257127	0.742506		Imm (24 h) 6	0.346296	0.639466	1.84659		Imm (24 h) 6	0.346296	0.363719	1.05031		Imm (24 h) 6	0.346296	0.130964	0.378185
Imm (day 3) 1	0.340353	0.0223542	0.0656795		Imm (day 3) 1	0.340353	0.0464793	0.136562		Imm (day 3) 1	0.340353	0.438029	1.28699		Imm (day 3) 1	0.340353	0.169362	0.497607		Imm (day 3) 1	0.340353	0.438029	1.28699		Imm (day 3) 1	0.340353	0.0371253	0.109079		Imm (day 3) 1	0.340353	0.0162471	0.0477361
Imm (day 3) 2	0.359427	0.0521674	0.14514		Imm (day 3) 2	0.359427	0.205327	0.571261		Imm (day 3) 2	0.359427	0.82209	2.28722		Imm (day 3) 2	0.359427	0.251612	0.700037		Imm (day 3) 2	0.359427	0.82209	2.28722		Imm (day 3) 2	0.359427	0.0882655	0.245573		Imm (day 3) 2	0.359427	0.0573049	0.159434
Imm (day 3) 3	0.559306	0.0222152	0.0397193		Imm (day 3) 3	0.559306	0.0413076	0.073855		Imm (day 3) 3	0.559306	0.497628	0.889724		Imm (day 3) 3	0.559306	0.182736	0.326718		Imm (day 3) 3	0.559306	0.497628	0.889724		Imm (day 3) 3	0.559306	0.0270634	0.0483874		Imm (day 3) 3	0.559306	0.0243949	0.0436164
Imm (day 3) 4	0.418893	0.0556879	0.132941		Imm (day 3) 4	0.418893	0.128076	0.305748		Imm (day 3) 4	0.418893	0.216237	0.51621		Imm (day 3) 4	0.418893	0.242494	0.578892		Imm (day 3) 4	0.418893	0.216237	0.51621		Imm (day 3) 4	0.418893	0.0431735	0.103066		Imm (day 3) 4	0.418893	0.0299819	0.0715742
Imm (day 3) 5	0.466641	0.0587509	0.125902		Imm (day 3) 5	0.466641	0.181002	0.387884		Imm (day 3) 5	0.466641	0.212995	0.456443		Imm (day 3) 5	0.466641	0.301216	0.6455		Imm (day 3) 5	0.466641	0.212995	0.456443		Imm (day 3) 5	0.466641	0.0779801	0.167109		Imm (day 3) 5	0.466641	0.0329007	0.0705055
Imm (day 3) 6	0.501816	0.0508334	0.101299		Imm (day 3) 6	0.501816	0.113188	0.225557		Imm (day 3) 6	0.501816	0.265628	0.529335		Imm (day 3) 6	0.501816	0.388571	0.77433		Imm (day 3) 6	0.501816	0.265628	0.529335		Imm (day 3) 6	0.501816	0.0529288	0.105475		Imm (day 3) 6	0.501816	0.0345334	0.0688169
Imm (day 5) 1	0.419956	0.0863716	0.205668		Imm (day 5) 1	0.419956	0.241494	0.575047		Imm (day 5) 1	0.419956	0.220993	0.526229		Imm (day 5) 1	0.419956	0.265541	0.632308		Imm (day 5) 1	0.419956	0.220993	0.526229		Imm (day 5) 1	0.419956	0.130532	0.310824		Imm (day 5) 1	0.419956	0.0734056	0.174794
Imm (day 5) 2	0.285007	0.0999472	0.350683		Imm (day 5) 2	0.285007	0.309262	1.0851		Imm (day 5) 2	0.285007	0.309108	1.08456		Imm (day 5) 2	0.285007	0.286338	1.00467		Imm (day 5) 2	0.285007	0.309108	1.08456		Imm (day 5) 2	0.285007	0.174814	0.613367		Imm (day 5) 2	0.285007	0.0923629	0.324072
Imm (day 5) 3	0.472491	0.0826886	0.175006		Imm (day 5) 3	0.472491	0.155082	0.328221		Imm (day 5) 3	0.472491	0.587031	1.24242		Imm (day 5) 3	0.472491	0.272616	0.576976		Imm (day 5) 3	0.472491	0.587031	1.24242		Imm (day 5) 3	0.472491	0.111417	0.235807		Imm (day 5) 3	0.472491	0.057147	0.120948
Imm (day 5) 4	0.452722	0.0791721	0.17488		Imm (day 5) 4	0.452722	0.315932	0.697851		Imm (day 5) 4	0.452722	0.275308	0.608117		Imm (day 5) 4	0.452722	0.313153	0.691713		Imm (day 5) 4	0.452722	0.275308	0.608117		Imm (day 5) 4	0.452722	0.175607	0.387891		Imm (day 5) 4	0.452722	0.0783412	0.173045
Imm (day 5) 5	0.383696	0.100966	0.263141		Imm (day 5) 5	0.383696	0.242005	0.63072		Imm (day 5) 5	0.383696	0.235158	0.612876		Imm (day 5) 5	0.383696	0.264285	0.688788		Imm (day 5) 5	0.383696	0.235158	0.612876		Imm (day 5) 5	0.383696	0.165226	0.430616		Imm (day 5) 5	0.383696	0.0738349	0.192431
Imm (day 5) 6	0.490491	0.131436	0.267968		Imm (day 5) 6	0.490491	0.176426	0.359692		Imm (day 5) 6	0.490491	0.320715	0.653865		Imm (day 5) 6	0.490491	0.264285	0.538818		Imm (day 5) 6	0.490491	0.320715	0.653865		Imm (day 5) 6	0.490491	0.146806	0.299304		Imm (day 5) 6	0.490491	0.134498	0.27421
Imm (day 7) 1	0.20356	0.0512512	0.645687		Imm (day 7) 1	0.20356	0.206541	1.01465		Imm (day 7) 1	0.20356	0.224411	1.57553		Imm (day 7) 1	0.20356	0.165856	1.29832		Imm (day 7) 1	0.20356	0.224411	1.57553		Imm (day 7) 1	0.20356	0.0742072	0.721194		Imm (day 7) 1	0.20356	0.0384912	0.660728
Imm (day 7) 2	0.528349	0.355226	0.0970025		Imm (day 7) 2	0.528349	0.378587	0.716547		Imm (day 7) 2	0.528349	0.368751	0.424741		Imm (day 7) 2	0.528349	0.298753	0.313914		Imm (day 7) 2	0.528349	0.368751	0.424741		Imm (day 7) 2	0.528349	0.358264	0.140451		Imm (day 7) 2	0.528349	0.245127	0.0728519
Imm (day 7) 3	0.301627	0.0650912	1.1777		Imm (day 7) 3	0.301627	0.140423	0.465552		Imm (day 7) 3	0.301627	0.227519	1.22254		Imm (day 7) 3	0.301627	0.182367	0.99047		Imm (day 7) 3	0.301627	0.227519	1.22254		Imm (day 7) 3	0.301627	0.0981264	1.18777		Imm (day 7) 3	0.301627	0.0615934	0.812683
Imm (day 7) 4					Imm (day 7) 4					Imm (day 7) 4					Imm (day 7) 4					Imm (day 7) 4					Imm (day 7) 4					Imm (day 7) 4
Imm (day 7) 5					Imm (day 7) 5					Imm (day 7) 5					Imm (day 7) 5					Imm (day 7) 5					Imm (day 7) 5					Imm (day 7) 5
Imm (day 7) 6					Imm (day 7) 6					Imm (day 7) 6					Imm (day 7) 6					Imm (day 7) 6					Imm (day 7) 6					Imm (day 7) 6
