# Supplementary material for: Brown adipose tissue and skeletal muscle coordinately contribute to thermogenesis in mice
Source: eLife. 2025 Oct 27;13:RP99982. doi: 10.7554/eLife.99982 (PMC12558653; doi:10.7554/eLife.99982)
Supplement: Figure 4—source data 1. [file elife-99982-fig4-data1.xlsx]

## Sheet: Fig.4A-B
(A and B) RT and real-time PCR analysis of IL-1b, IL-6, IL-10, IL-15, TNF-a, MCP-1, BMP8B, FGF21, and irisin gene expression in iBAT (A) or soleus (B) of control mice or mice at 10 h (iBAT) or 24 h (soleus) after bilateral cast immobilization (n = 5 or 6 per group).
iBAT										Soleus
/Gapdh	Il1β	Il6	Il10	Il15	Tnfa	Mcp-1	Bmp8b	Fgf21		/Gapdh	Il1β	Il6	Il10	Il15	Tnfa	Mcp-1	Irisin	Fgf21
Control 1	0.389804	1.18406	1.60987	1.41323	1.3783	0.645031	1.56067	1.1162		Control 1	2.18965	1.82406	3.87731	3.74499	2.69641	2.01043	2.32629	3.23608
Control 2	0.21001	0.634152	1.00156	0.942572	0.923095	0.584883	0.576379	0.914988		Control 2	1.78373	0.699304	2.51794	2.8757	1.40186	1.198	4.05207	1.04508
Control 3	0.58537	1.56104	0.696891	0.533181	1.01779	0.531382	0.3229	0.549888		Control 3	2.03758	1.33809	2.16831	3.52551	2.40957	1.71319	3.76254	1.82365
Control 4	0.41129	0.780232	0.839508	0.79104	1.09154	0.398135	0.56754	0.716732		Control 4	-	-	6.86088	-	4.37332	3.64189	2.67979	3.35308
Control 5	0.216704	0.585307	1.19319	0.878218	0.835468	0.284837	0.504232	0.853139		Control 5	2.44808	0.641892	1.39786	3.0418	0.675586	0.796388	3.55827	0.591166
Control 6	0.175544	0.207556	0.599178	1.15812	0.773931	0.259585	0.350496	0.385851		Control 6	0.968207	0.982985	2.37925	3.53937	1.6437	1.40001	3.28279	1.42534
Imm (10 h) 1	0.177871	10.4809	1.21269	0.551675	0.28719	0.544956	0.429053	1.3333		Imm (24 h) 1	1.04047	1.66218	3.31496	3.54563	1.86825	2.10131	3.11692	2.38165
Imm (10 h) 2	0.397856	4.90224	1.46268	0.275169	0.42715	0.538238	0.356904	1.36515		Imm (24 h) 2	1.80697	1.6864	3.39421	3.0448	2.26336	1.97625	2.87335	2.06508
Imm (10 h) 3	0.381487	5.95623	0.879564	0.370084	0.534468	0.562288	0.354237	1.05381		Imm (24 h) 3	-	2.57695	3.98774	2.98903	2.53019	1.93321	2.89868	3.00605
Imm (10 h) 4	0.243105	6.69362	1.37655	0.491606	0.350883	0.420586	0.385912	1.38754		Imm (24 h) 4	3.24812	1.3988	2.4926	3.95775	1.77671	1.79851	5.12163	1.16667
Imm (10 h) 5	0.187289	2.74988	0.893381	0.507417	0.441478	0.761635	0.364645	0.59568		Imm (24 h) 5	1.82217	2.92839	3.43051	3.7369	3.1367	2.53563	2.40214	3.038
Imm (10 h) 6	2.40569	1.08177	1.06483	0.553764	1.51266	-	0.280286	0.86371		Imm (24 h) 6	2.98397	3.48356	4.49136	2.6167	3.45714	2.52323	2.71166	2.96067
Fold change	IL-1β	IL-6	IL-10	IL-15	TNFα	MCP-1	BMP8B	FGF21		Fold change	Il1β	Il6	Il10	Il15	Tnfa	Mcp-1	Irisin	Fgf21
Control 1	1.17604	1.43454	1.62608	1.48336	1.37369	1.43136	2.41203	1.47619		Control 1	1.16134	1.66237	1.21156	1.11942	1.2256	1.12107	0.709894	1.69216
Control 2	0.633604	0.768305	1.01164	0.989341	0.92001	1.29789	0.890799	1.21009		Control 2	0.946052	0.637315	0.786792	0.859579	0.63719	0.668037	1.23653	0.546477
Control 3	1.76607	1.89127	0.703907	0.559637	1.01439	1.17917	0.499044	0.727238		Control 3	1.08069	1.21947	0.677543	1.05382	1.09522	0.95532	1.14818	0.953593
Control 4	1.24087	0.945287	0.847959	0.830291	1.08789	0.883484	0.877139	0.947892		Control 4	-	-	2.14385	-	1.9878	2.03081	0.817768	1.75334
Control 5	0.653799	0.709127	1.20521	0.921794	0.832675	0.632068	0.779295	1.12829		Control 5	1.29841	0.584992	0.436797	0.909228	0.307074	0.444086	1.08584	0.309123
Control 6	0.529618	0.251464	0.60521	1.21558	0.771345	0.576033	0.541694	0.510295		Control 6	0.513516	0.895849	0.743455	1.05796	0.74711	0.78068	1.00178	0.745314
Imm (10 h) 1	0.536639	12.6982	1.22489	0.579049	0.28623	1.20929	0.663105	1.76332		Imm (24 h) 1	0.551845	1.51484	1.03584	1.05983	0.849177	1.17175	0.951163	1.24537
Imm (10 h) 2	1.20034	5.93929	1.4774	0.288823	0.425722	1.19438	0.551599	1.80544		Imm (24 h) 2	0.958379	1.53691	1.0606	0.910124	1.02876	1.10201	0.876835	1.07984
Imm (10 h) 3	1.15095	7.21625	0.888419	0.388448	0.532682	1.24775	0.547477	1.39369		Imm (24 h) 3	-	2.34852	1.24607	0.893454	1.15005	1.07801	0.884564	1.57187
Imm (10 h) 4	0.733451	8.10963	1.39041	0.515999	0.349711	0.933305	0.59643	1.83505		Imm (24 h) 4	1.72273	1.2748	0.778876	1.18302	0.80757	1.0029	1.56292	0.610058
Imm (10 h) 5	0.565053	3.33161	0.902375	0.532594	0.440002	1.69011	0.563562	0.787798		Imm (24 h) 5	0.966437	2.66881	1.07195	1.117	1.42573	1.41393	0.73304	1.58858
Imm (10 h) 6	7.25799	1.31061	1.07555	0.581241	1.5076	-	0.433185	1.14227		Imm (24 h) 6	1.58263	3.17476	1.40344	0.782161	1.57138	1.40702	0.827494	1.54814

## Sheet: Fig.4C-D
(C and D) RT and real-time PCR analysis of Il6 expression in iBAT (C) and soleus (D) of control mice and mice at the indicated times after bilateral cast immobilization (n = 3–7 per group).
iBAT					Soleus
	Gapdh	Il6	Il6/Gapdh			Gapdh	Il6	Il6/Gapdh
Control 1	0.19773	0.234124	1.18406		Control 1	0.0460839	0.0840599	1.82406
Control 2	0.785715	0.498263	0.634152		Control 2	0.0654096	0.0457412	0.699304
Control 3	0.212597	0.331873	1.56104		Control 3	0.0654427	0.087568	1.33809
Control 4	0.440554	0.343735	0.780232		Control 4	0.0286143	-	-
Control 5	0.280866	0.164393	0.585307		Control 5	0.10042	0.0644586	0.641892
Control 6	0.634847	0.131766	0.207556		Control 6	0.0809185	0.0795417	0.982985
Imm (6 h) 1	0.487876	2.6768	5.48663		Imm (10 h) 1	0.0798282	0.170884	2.14065
Imm (6 h) 2	0.655208	1.41656	2.162		Imm (10 h) 2	0.0555835	0.112908	2.03133
Imm (6 h) 3	0.33366	1.30826	3.92093		Imm (10 h) 3	0.0559666	0.0976181	1.74422
Imm (6 h) 4	0.330298	2.74486	8.31026		Imm (10 h) 4	0.0798931	0.0753936	0.94368
Imm (6 h) 5	0.367421	1.06286	2.89274		Imm (10 h) 5	0.0703076	0.0467637	0.66513
Imm (6 h) 6	0.354546	2.65244	7.48123		Imm (10 h) 6	0.0452364	0.0390201	0.86258
Imm (10 h) 1	0.257258	2.69631	10.4809		Imm (24 h) 1	0.058617	0.0974322	1.66218
Imm (10 h) 2	0.366258	1.79548	4.90224		Imm (24 h) 2	0.0505273	0.0852091	1.6864
Imm (10 h) 3	0.271277	1.61579	5.95623		Imm (24 h) 3	0.0484644	0.12489	2.57695
Imm (10 h) 4	0.388536	2.60071	6.69362		Imm (24 h) 4	0.05498	0.0769061	1.3988
Imm (10 h) 5	0.494522	1.35988	2.74988		Imm (24 h) 5	0.0397523	0.11641	2.92839
Imm (10 h) 6	0.628003	0.679354	1.08177		Imm (24 h) 6	0.0623451	0.217183	3.48356
Imm (24 h) 1	0.422701	0.136645	0.323266		Imm (day 3) 1	0.0489579	0.298348	6.09397
Imm (24 h) 2	0.265282	0.127139	0.479261		Imm (day 3) 2	0.0720743	-	-
Imm (24 h) 3	0.465685	0.468098	1.00518		Imm (day 3) 3	0.0517	0.0411256	0.795467
Imm (24 h) 4	0.229763	0.107532	0.468012		Imm (day 3) 4	0.0657859	0.17443	2.65148
Imm (24 h) 5	0.414387	0.22062	0.5324		Imm (day 3) 5	0.0578573	0.110409	1.9083
Imm (24 h) 6	0.270824	0.307976	1.13718		Imm (day 3) 6	0.0623626	0.112507	1.80408
Imm (day 3) 1	0.345657	0.257144	0.743929		Imm (day 5) 1	0.0555774	0.112924	2.03183
Imm (day 3) 2	0.535394	0.278687	0.520526		Imm (day 5) 2	0.0374358	0.0754509	2.01548
Imm (day 3) 3	0.327061	0.264814	0.80968		Imm (day 5) 3	0.0570156	0.250347	4.39086
Imm (day 3) 4	0.463695	0.753332	1.62463		Imm (day 5) 4	0.077816	0.257307	3.30661
Imm (day 3) 5	0.335634	0.360153	1.07305		Imm (day 5) 5	0.0681701	0.210311	3.08509
Imm (day 3) 6	0.414173	0.427434	1.03202		Imm (day 5) 6	0.0752484	0.277267	3.68469
Imm (day 5) 1	0.67022	0.514408	0.76752		Imm (day 7) 1	0.0651738	0.332208	5.09726
Imm (day 5) 2	0.546253	1.13917	2.08542		Imm (day 7) 2	0.0503187	0.266967	5.30552
Imm (day 5) 3	0.47445	0.430026	0.906367		Imm (day 7) 3	0.0991879	0.333229	3.35958
Imm (day 5) 4	0.367195	0.815956	2.22213		Imm (day 7) 4	0.060158	0.296465	4.92811
Imm (day 5) 5	0.486572	0.466636	0.959026		Imm (day 7) 5	0.0534683	0.257136	4.80914
Imm (day 5) 6	0.584898	0.255099	0.436143		Imm (day 7) 6	0.0558462	0.227926	4.08131
Imm (day 7) 1	0.637207	0.331387	0.520061		Imm (day 7) 7	0.0558462	0.236774	4.23975
Imm (day 7) 2	0.474437	0.3982	0.83931
Imm (day 7) 3	0.408755	0.302297	0.739555

## Sheet: Fig.4E-L
(E–L) RT and real-time PCR analysis of Saa3 (E, G, I, and K) and Socs3 (F, H, J, and L) mRNA abundance in iBAT (E and F), soleus (G and H), liver (I and J), and eWAT (K and L) of control mice and mice at the indicated times after bilateral cast immobilization (n = 3–7 per group)
iBAT
	Gapdh	Saa3	Saa3/Gapdh			Gapdh	Socs3	Socs3/Gapdh
Control 1	0.19773	0.0498086	0.251902		Control 1	0.19773	0.220495	1.11513
Control 2	0.785715	0.189622	0.241337		Control 2	0.785715	0.326637	0.415719
Control 3	0.212597	0.162374	0.763763		Control 3	0.212597	0.383161	1.80228
Control 4	0.440554	0.215039	0.488109		Control 4	0.440554	0.356879	0.810067
Control 5	0.280866	0.0474294	0.168868		Control 5	0.280866	0.296837	1.05686
Control 6	0.634847	0.112319	0.176922		Control 6	0.634847	0.269667	0.424776
Imm (6 h) 1	0.487876	22.4116	45.9371		Imm (6 h) 1	0.487876	1.91573	3.92668
Imm (6 h) 2	0.655208	11.6847	17.8336		Imm (6 h) 2	0.655208	1.24257	1.89646
Imm (6 h) 3	0.33366	7.38064	22.1203		Imm (6 h) 3	0.33366	0.985236	2.95282
Imm (6 h) 4	0.330298	11.405	34.5295		Imm (6 h) 4	0.330298	1.83047	5.54188
Imm (6 h) 5	0.367421	3.62168	9.85702		Imm (6 h) 5	0.367421	1.06072	2.88692
Imm (6 h) 6	0.354546	13.551	38.2208		Imm (6 h) 6	0.354546	1.43612	4.05059
Imm (10 h) 1	0.257258	20.1802	78.4433		Imm (10 h) 1	0.257258	1.73557	6.74644
Imm (10 h) 2	0.366258	9.0673	24.7566		Imm (10 h) 2	0.366258	1.73924	4.74868
Imm (10 h) 3	0.271277	14.368	52.9641		Imm (10 h) 3	0.271277	1.12458	4.14549
Imm (10 h) 4	0.388536	12.8139	32.9799		Imm (10 h) 4	0.388536	1.76624	4.54589
Imm (10 h) 5	0.494522	19.621	39.6768		Imm (10 h) 5	0.494522	1.44435	2.9207
Imm (10 h) 6	0.628003	14.2653	22.7153		Imm (10 h) 6	0.628003	0.948511	1.51036
Imm (24 h) 1	0.422701	0.0781951	0.184989		Imm (24 h) 1	0.422701	0.21054	0.498081
Imm (24 h) 2	0.265282	0.0949014	0.357738		Imm (24 h) 2	0.265282	0.223672	0.843149
Imm (24 h) 3	0.465685	0.481686	1.03436		Imm (24 h) 3	0.465685	0.347495	0.746201
Imm (24 h) 4	0.229763	1.01256	4.40698		Imm (24 h) 4	0.229763	0.389514	1.69529
Imm (24 h) 5	0.414387	3.66555	8.84571		Imm (24 h) 5	0.414387	0.36155	0.872494
Imm (24 h) 6	0.270824	0.228787	0.84478		Imm (24 h) 6	0.270824	0.373282	1.37832
Imm (day 3) 1	0.345657	0.523615	1.51484		Imm (day 3) 1	0.345657	0.330456	0.956024
Imm (day 3) 2	0.535394	0.141363	0.264036		Imm (day 3) 2	0.535394	0.320493	0.598611
Imm (day 3) 3	0.327061	0.186416	0.569974		Imm (day 3) 3	0.327061	0.281808	0.861637
Imm (day 3) 4	0.463695	1.74247	3.75779		Imm (day 3) 4	0.463695	0.847471	1.82765
Imm (day 3) 5	0.335634	0.750058	2.23475		Imm (day 3) 5	0.335634	0.344975	1.02783
Imm (day 3) 6	0.414173	0.857655	2.07076		Imm (day 3) 6	0.414173	0.422052	1.01902
Imm (day 5) 1	0.67022	1.17816	1.75788		Imm (day 5) 1	0.67022	0.400009	0.596832
Imm (day 5) 2	0.546253	4.23825	7.75877		Imm (day 5) 2	0.546253	0.973528	1.78219
Imm (day 5) 3	0.47445	1.3029	2.74612		Imm (day 5) 3	0.47445	0.565779	1.19249
Imm (day 5) 4	0.367195	3.89725	10.6136		Imm (day 5) 4	0.367195	0.861005	2.34482
Imm (day 5) 5	0.486572	1.42583	2.93035		Imm (day 5) 5	0.486572	0.66927	1.37548
Imm (day 5) 6	0.584898	1.90665	3.2598		Imm (day 5) 6	0.584898	0.59354	1.01478
Imm (day 7) 1	0.637207	0.192155	0.301559		Imm (day 7) 1	0.637207	0.388355	0.609463
Imm (day 7) 2	0.474437	0.899	1.89488		Imm (day 7) 2	0.474437	0.425713	0.897301
Imm (day 7) 3	0.408755	0.109196	0.267143		Imm (day 7) 3	0.408755	0.330232	0.807897
Soleus
	Gapdh	Saa3	Saa3/Gapdh			Gapdh	Socs3	Socs3/Gapdh
Control 1	0.0460839	0.0734799	1.59448		Control 1	0.0460839	0.126292	2.74047
Control 2	0.0654096	0.067864	1.03752		Control 2	0.0654096	0.112173	1.71493
Control 3	0.0654427	0.0775281	1.18467		Control 3	0.0654427	0.104984	1.60422
Control 4	0.0286143	0.12932	4.5194		Control 4	0.0286143	0.129166	4.51403
Control 5	0.10042	0.0597174	0.594678		Control 5	0.10042	0.0904814	0.901033
Control 6	0.0809185	0.126397	1.56203		Control 6	0.0809185	0.134446	1.66149
Imm (10 h) 1	0.0798282	0.180896	2.26607		Imm (10 h) 1	0.0798282	0.19994	2.50463
Imm (10 h) 2	0.0555835	0.176313	3.17205		Imm (10 h) 2	0.0555835	0.136692	2.45922
Imm (10 h) 3	0.0559666	0.117679	2.10266		Imm (10 h) 3	0.0559666	0.158524	2.83248
Imm (10 h) 4	0.0798931	0.082651	1.03452		Imm (10 h) 4	0.0798931	0.111535	1.39605
Imm (10 h) 5	0.0703076	0.136503	1.94151		Imm (10 h) 5	0.0703076	0.125819	1.78956
Imm (10 h) 6	0.0452364	0.0660027	1.45906		Imm (10 h) 6	0.0452364	0.102609	2.26829
Imm (24 h) 1	0.058617	0.111651	1.90475		Imm (24 h) 1	0.058617	0.154274	2.6319
Imm (24 h) 2	0.0505273	0.143419	2.83844		Imm (24 h) 2	0.0505273	0.122147	2.41745
Imm (24 h) 3	0.0484644	0.103708	2.13988		Imm (24 h) 3	0.0484644	0.16466	3.39755
Imm (24 h) 4	0.05498	0.0622632	1.13247		Imm (24 h) 4	0.05498	0.0831104	1.51165
Imm (24 h) 5	0.0397523	0.103366	2.60025		Imm (24 h) 5	0.0397523	0.136529	3.43449
Imm (24 h) 6	0.0623451	0.179737	2.88293		Imm (24 h) 6	0.0623451	0.199946	3.20709
Imm (day 3) 1	0.0489579	0.300541	6.13876		Imm (day 3) 1	0.0489579	0.266617	5.44585
Imm (day 3) 2	0.0720743	0.0214465	0.29756		Imm (day 3) 2	0.0720743	-	-
Imm (day 3) 3	0.0517	0.0506587	0.979859		Imm (day 3) 3	0.0517	0.0920555	1.78057
Imm (day 3) 4	0.0657859	0.18668	2.83769		Imm (day 3) 4	0.0657859	0.193907	2.94755
Imm (day 3) 5	0.0578573	0.131938	2.28041		Imm (day 3) 5	0.0578573	0.148562	2.56774
Imm (day 3) 6	0.0623626	0.216078	3.46487		Imm (day 3) 6	0.0623626	0.19426	3.11501
Imm (day 5) 1	0.0555774	0.204093	3.67223		Imm (day 5) 1	0.0555774	0.228361	4.10888
Imm (day 5) 2	0.0374358	0.09596	2.56332		Imm (day 5) 2	0.0374358	0.120184	3.21041
Imm (day 5) 3	0.0570156	0.276437	4.84845		Imm (day 5) 3	0.0570156	0.29996	5.26101
Imm (day 5) 4	0.077816	0.576384	7.40701		Imm (day 5) 4	0.077816	0.335693	4.31393
Imm (day 5) 5	0.0681701	0.290151	4.25628		Imm (day 5) 5	0.0681701	0.245449	3.60055
Imm (day 5) 6	0.0752484	0.255403	3.39413		Imm (day 5) 6	0.0752484	0.270387	3.59325
Imm (day 7) 1	0.0651738	0.551013	8.45451		Imm (day 7) 1	0.0651738	0.374029	5.73895
Imm (day 7) 2	0.0503187	0.544841	10.8278		Imm (day 7) 2	0.0503187	0.33194	6.59675
Imm (day 7) 3	0.0991879	0.578415	5.8315		Imm (day 7) 3	0.0991879	0.368579	3.71597
Imm (day 7) 4	0.060158	0.326084	5.42046		Imm (day 7) 4	0.060158	0.219486	3.64849
Imm (day 7) 5	0.0534683	0.419545	7.84661		Imm (day 7) 5	0.0534683	0.342649	6.40846
Imm (day 7) 6	0.0558462	0.349354	6.25566		Imm (day 7) 6	0.0558462	0.360871	6.46188
Liver
	Gapdh	Saa3	Saa3/Gapdh			Gapdh	Socs3	Socs3/Gapdh
Control 1	0.409913	0.00915202	0.0223268		Control 1	0.409913	0.33727	0.822785
Control 2	0.581773	0.0170554	0.0293163		Control 2	0.581773	0.459506	0.789838
Control 3	0.381727	0.00806054	0.021116		Control 3	0.381727	0.310553	0.813548
Control 4	0.348952	0.0132046	0.0378407		Control 4	0.348952	0.498649	1.42899
Control 5	0.327805	0.00823842	0.025132		Control 5	0.327805	0.255646	0.779872
Control 6	0.369175	0.0115988	0.0314182		Control 6	0.369175	0.435645	1.18005
Imm (10 h) 1	0.515985	0.315718	0.611873		Imm (10 h) 1	0.515985	0.3306	0.640716
Imm (10 h) 2	0.412407	1.54907	3.75616		Imm (10 h) 2	0.412407	0.363252	0.88081
Imm (10 h) 3	0.423172	0.0528177	0.124814		Imm (10 h) 3	0.423172	0.420486	0.993651
Imm (10 h) 4	0.756738	0.823499	1.08822		Imm (10 h) 4	0.756738	0.474753	0.627368
Imm (10 h) 5	0.437532	1.49694	3.42132		Imm (10 h) 5	0.437532	0.415375	0.94936
Imm (10 h) 6	0.433606	3.33626	7.69422		Imm (10 h) 6	0.433606	0.295065	0.680491
Imm (24 h) 1	0.443826	1.05563	2.37848		Imm (24 h) 1	0.443826	0.42589	0.959587
Imm (24 h) 2	0.541398	3.5217	6.50482		Imm (24 h) 2	0.541398	0.482974	0.892087
Imm (24 h) 3	0.461045	0.0391459	0.084907		Imm (24 h) 3	0.461045	0.598663	1.29849
Imm (24 h) 4	0.305194	0.73685	2.41436		Imm (24 h) 4	0.305194	0.536082	1.75653
Imm (24 h) 5	0.43497	0.0491753	0.113054		Imm (24 h) 5	0.43497	0.509965	1.17241
Imm (24 h) 6	0.459925	0.050193	0.109133		Imm (24 h) 6	0.459925	0.443298	0.96385
Imm (day 3) 1	0.496016	0.0353111	0.0711895		Imm (day 3) 1	0.496016	0.658718	1.32802
Imm (day 3) 2	0.403984	0.32505	0.80461		Imm (day 3) 2	0.403984	0.396901	0.982468
Imm (day 3) 3	0.55476	0.0683677	0.123238		Imm (day 3) 3	0.55476	0.508291	0.916235
Imm (day 3) 4	0.390893	0.01511	0.0386552		Imm (day 3) 4	0.390893	0.580342	1.48466
Imm (day 3) 5	0.408483	0.0159034	0.0389328		Imm (day 3) 5	0.408483	0.433932	1.0623
Imm (day 3) 6	0.568773	0.0172649	0.0303547		Imm (day 3) 6	0.568773	0.528534	0.929253
Imm (day 5) 1	0.49973	0.00676369	0.0135347		Imm (day 5) 1	0.49973	0.273866	0.548028
Imm (day 5) 2	0.526762	0.026361	0.0500435		Imm (day 5) 2	0.526762	0.405835	0.770433
Imm (day 5) 3	0.449816	0.375778	0.835405		Imm (day 5) 3	0.449816	0.375364	0.834485
Imm (day 5) 4	0.403226	0.0123384	0.0305993		Imm (day 5) 4	0.403226	0.333831	0.827899
Imm (day 5) 5	0.443253	0.0082958	0.0187157		Imm (day 5) 5	0.443253	0.274694	0.619724
Imm (day 5) 6	0.52959	0.052179	0.0985271		Imm (day 5) 6	0.52959	0.41337	0.780547
Imm (day 7) 1	0.471039	0.0213667	0.0453608		Imm (day 7) 1	0.471039	0.370686	0.786954
Imm (day 7) 2	0.411731	0.0164054	0.0398448		Imm (day 7) 2	0.411731	0.328194	0.797107
Imm (day 7) 3	0.546094	0.0087605	0.0160421		Imm (day 7) 3	0.546094	0.294067	0.538492
Imm (day 7) 4	0.343222	0.0104898	0.0305628		Imm (day 7) 4	0.343222	0.308479	0.898773
Imm (day 7) 5	0.527314	0.0143131	0.0271434		Imm (day 7) 5	0.527314	0.223561	0.423962
Imm (day 7) 6	0.746381	0.0301037	0.0403328		Imm (day 7) 6	0.746381	0.613591	0.822087
eWAT
	Gapdh	Saa3	Saa3/Gapdh			Gapdh	Socs3	Socs3/Gapdh
Control 1	0.525189	0.0447638	0.0852338		Control 1	0.525189	0.372026	0.708366
Control 2	0.284872	0.0372196	0.130654		Control 2	0.284872	0.235722	0.827469
Control 3	0.235954	0.0241381	0.1023		Control 3	0.235954	0.168625	0.714651
Control 4	0.232012	0.068406	0.294838		Control 4	0.232012	0.166262	0.71661
Control 5	0.392542	0.0786448	0.200347		Control 5	0.392542	0.348703	0.88832
Control 6	0.452151	0.0528907	0.116976		Control 6	0.452151	0.301651	0.667147
Imm (10 h) 1	0.380035	0.409842	1.07843		Imm (10 h) 1	0.380035	0.305534	0.803965
Imm (10 h) 2	0.385996	0.422376	1.09425		Imm (10 h) 2	0.385996	0.250875	0.64994
Imm (10 h) 3	0.355211	0.0428923	0.120751		Imm (10 h) 3	0.355211	0.269818	0.7596
Imm (10 h) 4	0.451879	1.43679	3.17958		Imm (10 h) 4	0.451879	0.364036	0.805606
Imm (10 h) 5	0.353214	0.695704	1.96964		Imm (10 h) 5	0.353214	0.249851	0.707365
Imm (10 h) 6	0.175584	0.179012	1.01952		Imm (10 h) 6	0.175584	0.109355	0.622807
Imm (24 h) 1	0.444202	0.858402	1.93246		Imm (24 h) 1	0.444202	0.381226	0.858227
Imm (24 h) 2	0.797046	1.33506	1.67502		Imm (24 h) 2	0.797046	0.771809	0.968336
Imm (24 h) 3	0.188168	0.0209784	0.111487		Imm (24 h) 3	0.188168	0.177903	0.945444
Imm (24 h) 4	0.200904	0.360542	1.7946		Imm (24 h) 4	0.200904	0.200222	0.996604
Imm (24 h) 5	0.113802	0.509817	4.47988		Imm (24 h) 5	0.113802	0.124627	1.09513
Imm (24 h) 6	0.358946	0.233382	0.650185		Imm (24 h) 6	0.358946	0.390578	1.08812
Imm (day 3) 1	0.46026	0.267492	0.581176		Imm (day 3) 1	0.46026	0.268416	0.583184
Imm (day 3) 2	0.345943	0.203462	0.588136		Imm (day 3) 2	0.345943	0.252082	0.728682
Imm (day 3) 3	0.445006	0.355476	0.798813		Imm (day 3) 3	0.445006	0.318811	0.716421
Imm (day 3) 4	0.249667	0.410698	1.64498		Imm (day 3) 4	0.249667	0.122613	0.491107
Imm (day 3) 5	0.515247	0.366078	0.710489		Imm (day 3) 5	0.515247	0.381519	0.740458
Imm (day 3) 6	0.473451	1.90791	4.02979		Imm (day 3) 6	0.473451	0.462856	0.977621
Imm (day 5) 1	0.636123	0.147325	0.231599		Imm (day 5) 1	0.636123	0.504705	0.793409
Imm (day 5) 2	0.405583	0.123634	0.304832		Imm (day 5) 2	0.405583	0.310947	0.766667
Imm (day 5) 3	0.696232	4.59825	6.60448		Imm (day 5) 3	0.696232	0.626324	0.899592
Imm (day 5) 4	0.759109	0.181202	0.238704		Imm (day 5) 4	0.759109	0.687024	0.905039
Imm (day 5) 5	0.837528	0.218023	0.260317		Imm (day 5) 5	0.837528	0.566974	0.676961
Imm (day 5) 6	0.808147	0.126795	0.156896		Imm (day 5) 6	0.808147	0.601365	0.744128
Imm (day 7) 1	0.809365	0.140444	0.173523		Imm (day 7) 1	0.809365	0.663328	0.819566
Imm (day 7) 2	0.627428	0.163946	0.261299		Imm (day 7) 2	0.627428	0.778364	1.24056
Imm (day 7) 3	0.67685	0.201365	0.297503		Imm (day 7) 3	0.67685	0.488534	0.721776
Imm (day 7) 4	1.29248	0.194069	0.150153		Imm (day 7) 4	1.29248	1.18564	0.917343
Imm (day 7) 5	0.696582	0.157418	0.225986		Imm (day 7) 5	0.696582	0.639612	0.918215

## Sheet: Fig.4M
(M) RT and real-time PCR analysis of Il6 expression, respectively, in denervated iBAT of control mice or mice at the indicated times after bilateral cast immobilization (n = 4-7 per group).
Denervated iBAT
	Gapdh	Il6	Il6/Gapdh
Control 1	0.293351	1.05997	3.61332
Control 2	0.772786	2.17699	2.81707
Control 3	0.439352	1.96788	4.47904
Control 4	0.777004	3.32272	4.27632
Control 5	0.740231	2.94899	3.98388
Control 6	0.726466	2.51804	3.46615
Imm (6 h) 1	0.565238	1.62827	2.88068
Imm (6 h) 2	0.666386	2.34238	3.51505
Imm (6 h) 3	0.507563	1.8006	3.54753
Imm (6 h) 4	0.708573	2.3685	3.34264
Imm (6 h) 5	0.832817	2.62571	3.1528
Imm (6 h) 6	0.786531	2.14699	2.7297
Imm (6 h) 7	0.688912	1.79797	2.60987
Imm (10 h) 1	0.383169	1.09773	2.86486
Imm (10 h) 2	0.671766	1.83247	2.72784
Imm (10 h) 3	0.790266	3.21556	4.06897
Imm (10 h) 4	0.94042	3.76054	3.99879
Imm (10 h) 5	0.776911	2.46665	3.17494
Imm (10 h) 6	0.958755	3.08447	3.21716
Imm (24 h) 1	0.82739	3.72931	4.50732
Imm (24 h) 2	0.958333	3.68762	3.84795
Imm (24 h) 3	0.754443	2.89109	3.83209
Imm (24 h) 4	0.941646	3.46562	3.68039
Imm (24 h) 5	1.21968	5.06047	4.14902
Imm (24 h) 6	0.298308	0.755447	2.53243
Imm (day 3) 1	0.291908	0.810874	2.77784
Imm (day 3) 2	0.416147	1.14244	2.74528
Imm (day 3) 3	0.35058	1.54372	4.40333
Imm (day 3) 4	0.458535	1.4104	3.07588
Imm (day 3) 5	0.410368	1.33031	3.24174
Imm (day 3) 6	0.52041	1.37853	2.64894
Imm (day 5) 1	0.494766	1.70359	3.44322
Imm (day 5) 2	0.325234	0.722102	2.22025
Imm (day 5) 3	0.410344	1.14409	2.78812
Imm (day 5) 4	0.368291	0.978582	2.65709
Imm (day 5) 5	0.505512	1.72067	3.40381
Imm (day 7) 1	0.443815	1.74523	3.93234
Imm (day 7) 2	0.260302	0.776401	2.98269
Imm (day 7) 3	0.557042	1.02268	1.83591
Imm (day 7) 4	0.41252	1.12591	2.72935

## Sheet: Fig.4N
(N) Serum IL-6 concentration in control mice or mice at the indicated times after bilateral cast immobilization (n = 6 per group).
(pg/mL)	Abs.1	Abs.2	Abs.3	Abs.average	Abs.-Blank			Abs.1	Abs.2	Abs.average	Abs.-blank	Concentration
0	0.035	0.028	0.026	0.0296667	-0.000333333		Control 1	0.036	0.037	0.0365	0.0065	7.28846
5.86	0.057	0.051	0.052	0.0533333	0.0233333		Control 2	0.05	0.049	0.0495	0.0195	9.78846
11.72	0.08	0.073	0.07	0.0743333	0.0443333		Control 3	0.038	0.034	0.036	0.006	7.19231
23.44	0.13	0.118	0.112	0.12	0.09		Control 4	0.034	0.034	0.034	0.004	6.80769
46.89	0.249	0.228	0.225	0.234	0.204		Control 5	0.029	0.031	0.03	0	6.03846
93.77	0.504	0.431	0.429	0.454667	0.424667		Control 6	0.051	0.052	0.0515	0.0215	10.1731
187.5	0.99	0.803	0.878	0.890333	0.860333		Imm (6 h) 1	0.177	0.177	0.177	0.147	34.3077
375	2.165	1.988	1.82	1.991	1.961		Imm (6 h) 2	0.637	0.663	0.65	0.62	125.269
							Imm (6 h) 3	0.471	0.51	0.4905	0.4605	94.5962
							Imm (6 h) 4	0.158	0.148	0.153	0.123	29.6923
							Imm (6 h) 5	0.114	0.111	0.1125	0.0825	21.9038
							Imm (6 h) 6	0.045	0.044	0.0445	0.0145	8.82692
							Imm (10 h) 1	0.227	0.267	0.247	0.217	47.7692
							Imm (10 h) 2	0.24	0.232	0.236	0.206	45.6538
							Imm (10 h) 3	0.362	0.417	0.3895	0.3595	75.1731
							Imm (10 h) 4	0.193	0.193	0.193	0.163	37.3846
							Imm (10 h) 5	0.413	0.365	0.389	0.359	75.0769
							Imm (10 h) 6	0.382	0.456	0.419	0.389	80.8462
							Imm (24 h) 1	0.321	0.323	0.322	0.292	62.1923
							Imm (24 h) 2	0.715	0.686	0.7005	0.6705	134.981
							Imm (24 h) 3	0.369	0.37	0.3695	0.3395	71.3269
							Imm (24 h) 4	0.484	-	0.484	0.454	93.3462
							Imm (24 h) 5	0.199	0.208	0.2035	0.1735	39.4038
							Imm (24 h) 6	0.329	0.414	0.3715	0.3415	71.7115
							Imm (day 3) 1	0.145	0.174	0.1595	0.1295	30.9423
							Imm (day 3) 2	0.088	0.092	0.09	0.06	17.5769
							Imm (day 3) 3	0.35	0.352	0.351	0.321	67.7692
							Imm (day 3) 4	0.119	0.115	0.117	0.087	22.7692
							Imm (day 3) 5	0.169	0.159	0.164	0.134	31.8077
							Imm (day 3) 6	0.324	0.388	0.356	0.326	68.7308
							Imm (day 5) 1	0.176	0.197	0.1865	0.1565	36.1346
							Imm (day 5) 2	0.367	0.372	0.3695	0.3395	71.3269
							Imm (day 5) 3	0.068	0.071	0.0695	0.0395	13.6346
							Imm (day 5) 4	0.274	0.293	0.2835	0.2535	54.7885
							Imm (day 5) 5	0.493	-	0.493	0.463	95.0769
							Imm (day 5) 6	0.909	-	0.909	0.879	175.077

## Sheet: S1A-G
(A–G) RT and real-time PCR analysis of TNF-a, MCP-1, IL-1β, IL-10, IL-15, FGF21, and BMP8B gene expression, respectively, in iBAT of control mice and mice at the indicated times after bilateral cast immobilization (n = 3–6 per group).
	Gapdh	Tnfa	Tnfa/Gapdh			Gapdh	Mcp-1	Mcp-1/Gapdh			Gapdh	Il1b	Il1b/Gapdh			Gapdh	Il10	Il10/Gapdh			Gapdh	Il15	Il15/Gapdh			Gapdh	Fgf21	Fgf21/Gapdh			Gapdh	Bmp8b	Bmp8b/Gapdh
Control 1	0.207281	0.285695	1.3783		Control 1	0.207281	0.133702	0.645031		Control 1	0.207281	0.0807988	0.389804		Control 1	0.207281	0.333695	1.60987		Control 1	0.207281	0.292936	1.41323		Control 1	0.207281	0.231366	1.1162		Control 1	0.207281	0.323496	1.56067
Control 2	0.412877	0.381125	0.923095		Control 2	0.412877	0.241485	0.584883		Control 2	0.412877	0.0867084	0.21001		Control 2	0.412877	0.41352	1.00156		Control 2	0.412877	0.389166	0.942572		Control 2	0.412877	0.377777	0.914988		Control 2	0.412877	0.237974	0.576379
Control 3	0.554963	0.564838	1.01779		Control 3	0.554963	0.294897	0.531382		Control 3	0.554963	0.324859	0.58537		Control 3	0.554963	0.386749	0.696891		Control 3	0.554963	0.295896	0.533181		Control 3	0.554963	0.305168	0.549888		Control 3	0.554963	0.179197	0.3229
Control 4	0.451072	0.492362	1.09154		Control 4	0.451072	0.179588	0.398135		Control 4	0.451072	0.185522	0.41129		Control 4	0.451072	0.378679	0.839508		Control 4	0.451072	0.356816	0.79104		Control 4	0.451072	0.323298	0.716732		Control 4	0.451072	0.256002	0.56754
Control 5	0.28611	0.239035	0.835468		Control 5	0.28611	0.0814945	0.284837		Control 5	0.28611	0.0620011	0.216704		Control 5	0.28611	0.341384	1.19319		Control 5	0.28611	0.251267	0.878218		Control 5	0.28611	0.244091	0.853139		Control 5	0.28611	0.144266	0.504232
Control 6	0.581126	0.449751	0.773931		Control 6	0.581126	0.150851	0.259585		Control 6	0.581126	0.102013	0.175544		Control 6	0.581126	0.348198	0.599178		Control 6	0.581126	0.67301	1.15812		Control 6	0.581126	0.224228	0.385851		Control 6	0.581126	0.203682	0.350496
Imm (10 h) 1	1.21973	0.350293	0.28719		Imm (10 h) 1	1.21973	0.664697	0.544956		Imm (10 h) 1	1.21973	0.216954	0.177871		Imm (10 h) 1	1.21973	1.47915	1.21269		Imm (10 h) 1	1.21973	0.672893	0.551675		Imm (10 h) 1	1.21973	1.62627	1.3333		Imm (10 h) 1	1.21973	0.523327	0.429053
Imm (10 h) 2	0.926669	0.395826	0.42715		Imm (10 h) 2	0.926669	0.498769	0.538238		Imm (10 h) 2	0.926669	0.36868	0.397856		Imm (10 h) 2	0.926669	1.35542	1.46268		Imm (10 h) 2	0.926669	0.254991	0.275169		Imm (10 h) 2	0.926669	1.26505	1.36515		Imm (10 h) 2	0.926669	0.330732	0.356904
Imm (10 h) 3	1.06919	0.57145	0.534468		Imm (10 h) 3	1.06919	0.601195	0.562288		Imm (10 h) 3	1.06919	0.407884	0.381487		Imm (10 h) 3	1.06919	0.940425	0.879564		Imm (10 h) 3	1.06919	0.395692	0.370084		Imm (10 h) 3	1.06919	1.12673	1.05381		Imm (10 h) 3	1.06919	0.378749	0.354237
Imm (10 h) 4	1.1844	0.415587	0.350883		Imm (10 h) 4	1.1844	0.498144	0.420586		Imm (10 h) 4	1.1844	0.287935	0.243105		Imm (10 h) 4	1.1844	1.63039	1.37655		Imm (10 h) 4	1.1844	0.58226	0.491606		Imm (10 h) 4	1.1844	1.64341	1.38754		Imm (10 h) 4	1.1844	0.457075	0.385912
Imm (10 h) 5	1.10958	0.489857	0.441478		Imm (10 h) 5	1.10958	0.845098	0.761635		Imm (10 h) 5	1.10958	0.207813	0.187289		Imm (10 h) 5	1.10958	0.991282	0.893381		Imm (10 h) 5	1.10958	0.563022	0.507417		Imm (10 h) 5	1.10958	0.660957	0.59568		Imm (10 h) 5	1.10958	0.404605	0.364645
Imm (10 h) 6	0.795234	1.20292	1.51266		Imm (10 h) 6	0.795234	-	-		Imm (10 h) 6	0.795234	1.91309	2.40569		Imm (10 h) 6	0.795234	0.846792	1.06483		Imm (10 h) 6	0.795234	0.440372	0.553764		Imm (10 h) 6	0.795234	0.686852	0.86371		Imm (10 h) 6	0.795234	0.222893	0.280286
Imm (24 h) 1	0.24077	0.335511	1.39349		Imm (24 h) 1	0.24077	0.151775	0.630373		Imm (24 h) 1	0.24077	0.212021	0.880596		Imm (24 h) 1	0.24077	0.132423	0.549996		Imm (24 h) 1	0.24077	0.274448	1.13988		Imm (24 h) 1	0.24077	0.104392	0.433574		Imm (24 h) 1	0.24077	0.361308	1.50064
Imm (24 h) 2	0.205131	0.165892	0.808712		Imm (24 h) 2	0.205131	0.223786	1.09094		Imm (24 h) 2	0.205131	0.133841	0.652465		Imm (24 h) 2	0.205131	0.19378	0.944663		Imm (24 h) 2	0.205131	0.250533	1.22133		Imm (24 h) 2	0.205131	0.151986	0.740919		Imm (24 h) 2	0.205131	0.298437	1.45486
Imm (24 h) 3	0.223243	1.30631	5.85154		Imm (24 h) 3	0.223243	0.191004	0.855591		Imm (24 h) 3	0.223243	0.433956	1.94388		Imm (24 h) 3	0.223243	0.166182	0.7444		Imm (24 h) 3	0.223243	0.265289	1.18834		Imm (24 h) 3	0.223243	0.123785	0.554488		Imm (24 h) 3	0.223243	0.240552	1.07754
Imm (24 h) 4	0.174767	1.17805	6.74069		Imm (24 h) 4	0.174767	0.216089	1.23644		Imm (24 h) 4	0.174767	0.201094	1.15064		Imm (24 h) 4	0.174767	0.164254	0.939848		Imm (24 h) 4	0.174767	0.267922	1.53302		Imm (24 h) 4	0.174767	0.14551	0.832595		Imm (24 h) 4	0.174767	0.281893	1.61297
Imm (24 h) 5	0.292428	0.499672	1.7087		Imm (24 h) 5	0.292428	0.265066	0.90643		Imm (24 h) 5	0.292428	0.481642	1.64704		Imm (24 h) 5	0.292428	0.168552	0.576389		Imm (24 h) 5	0.292428	0.265621	0.908329		Imm (24 h) 5	0.292428	0.173622	0.593727		Imm (24 h) 5	0.292428	0.683807	2.33838
Imm (24 h) 6	0.234715	0.235583	1.0037		Imm (24 h) 6	0.234715	0.165552	0.705333		Imm (24 h) 6	0.234715	0.0835333	0.355893		Imm (24 h) 6	0.234715	0.421299	1.79494		Imm (24 h) 6	0.234715	0.302384	1.2883		Imm (24 h) 6	0.234715	0.307568	1.31039		Imm (24 h) 6	0.234715	0.360878	1.53752
Imm (day 3) 1	0.227392	0.363856	1.60013		Imm (day 3) 1	0.227392	0.385972	1.69739		Imm (day 3) 1	0.227392	0.781334	3.43607		Imm (day 3) 1	0.227392	0.239529	1.05338		Imm (day 3) 1	0.227392	0.390921	1.71915		Imm (day 3) 1	0.227392	0.398038	1.75045		Imm (day 3) 1	0.227392	0.503674	2.215
Imm (day 3) 2	0.289088	0.434432	1.50277		Imm (day 3) 2	0.289088	0.329893	1.14115		Imm (day 3) 2	0.289088	0.317724	1.09905		Imm (day 3) 2	0.289088	0.267195	0.924267		Imm (day 3) 2	0.289088	0.422009	1.45979		Imm (day 3) 2	0.289088	0.23638	0.817674		Imm (day 3) 2	0.289088	0.510065	1.76439
Imm (day 3) 3	0.236422	0.35303	1.49322		Imm (day 3) 3	0.236422	0.316644	1.33932		Imm (day 3) 3	0.236422	0.540996	2.28827		Imm (day 3) 3	0.236422	0.273574	1.15714		Imm (day 3) 3	0.236422	0.296464	1.25396		Imm (day 3) 3	0.236422	0.270013	1.14208		Imm (day 3) 3	0.236422	0.590171	2.49627
Imm (day 3) 4	0.35477	0.927294	2.61379		Imm (day 3) 4	0.35477	0.603727	1.70174		Imm (day 3) 4	0.35477	0.561807	1.58358		Imm (day 3) 4	0.35477	0.41267	1.16321		Imm (day 3) 4	0.35477	0.464703	1.30987		Imm (day 3) 4	0.35477	0.497695	1.40287		Imm (day 3) 4	0.35477	0.726017	2.04645
Imm (day 3) 5	0.332029	0.867471	2.61263		Imm (day 3) 5	0.332029	0.457449	1.37774		Imm (day 3) 5	0.332029	0.693947	2.09002		Imm (day 3) 5	0.332029	0.285645	0.8603		Imm (day 3) 5	0.332029	0.529205	1.59385		Imm (day 3) 5	0.332029	0.319248	0.961505		Imm (day 3) 5	0.332029	0.50401	1.51797
Imm (day 3) 6	0.393706	0.481334	1.22257		Imm (day 3) 6	0.393706	0.375612	0.954042		Imm (day 3) 6	0.393706	0.207602	0.527302		Imm (day 3) 6	0.393706	0.415848	1.05624		Imm (day 3) 6	0.393706	0.448019	1.13795		Imm (day 3) 6	0.393706	0.337175	0.856414		Imm (day 3) 6	0.393706	0.365361	0.928006
Imm (day 5) 1	0.562003	0.500519	0.890597		Imm (day 5) 1	0.562003	0.511989	0.911007		Imm (day 5) 1	0.562003	0.328592	0.58468		Imm (day 5) 1	0.562003	0.324531	0.577455		Imm (day 5) 1	0.562003	0.489914	0.871727		Imm (day 5) 1	0.562003	0.324959	0.578216		Imm (day 5) 1	0.562003	0.481755	0.85721
Imm (day 5) 2	0.368991	0.489615	1.3269		Imm (day 5) 2	0.368991	0.575765	1.56038		Imm (day 5) 2	0.368991	0.345388	0.936034		Imm (day 5) 2	0.368991	0.385477	1.04468		Imm (day 5) 2	0.368991	0.473988	1.28455		Imm (day 5) 2	0.368991	0.648912	1.75862		Imm (day 5) 2	0.368991	0.58304	1.58009
Imm (day 5) 3	0.297918	0.431637	1.44884		Imm (day 5) 3	0.297918	0.294897	0.989861		Imm (day 5) 3	0.297918	0.416093	1.39667		Imm (day 5) 3	0.297918	0.26367	0.885041		Imm (day 5) 3	0.297918	0.320527	1.07589		Imm (day 5) 3	0.297918	0.356977	1.19824		Imm (day 5) 3	0.297918	0.363971	1.22171
Imm (day 5) 4	0.2976	0.526026	1.76756		Imm (day 5) 4	0.2976	0.556264	1.86917		Imm (day 5) 4	0.2976	0.33664	1.13118		Imm (day 5) 4	0.2976	0.354408	1.19089		Imm (day 5) 4	0.2976	0.405041	1.36102		Imm (day 5) 4	0.2976	0.50417	1.69412		Imm (day 5) 4	0.2976	0.642025	2.15734
Imm (day 5) 5	0.268914	0.51529	1.91619		Imm (day 5) 5	0.268914	0.446185	1.65921		Imm (day 5) 5	0.268914	0.19212	0.714431		Imm (day 5) 5	0.268914	0.352249	1.30989		Imm (day 5) 5	0.268914	0.478194	1.77824		Imm (day 5) 5	0.268914	0.464105	1.72585		Imm (day 5) 5	0.268914	0.513577	1.90982
Imm (day 5) 6	0.51714	0.405362	0.783854		Imm (day 5) 6	0.51714	0.495911	0.958949		Imm (day 5) 6	0.51714	0.283938	0.549054		Imm (day 5) 6	0.51714	0.386997	0.748341		Imm (day 5) 6	0.51714	0.472017	0.912745		Imm (day 5) 6	0.51714	0.498311	0.963591		Imm (day 5) 6	0.51714	0.497917	0.962829
Imm (day 7) 1	0.589294	0.831986	1.41183		Imm (day 7) 1	0.589294	0.430745	0.730951		Imm (day 7) 1	0.589294	0.46832	0.794713		Imm (day 7) 1	0.589294	0.355328	0.602972		Imm (day 7) 1	0.589294	0.62068	1.05326		Imm (day 7) 1	0.589294	0.32181	0.546094		Imm (day 7) 1	0.589294	0.241377	0.409603
Imm (day 7) 2	0.375203	0.439385	1.17106		Imm (day 7) 2	0.375203	0.346152	0.922572		Imm (day 7) 2	0.375203	0.34294	0.914011		Imm (day 7) 2	0.375203	0.341814	0.911011		Imm (day 7) 2	0.375203	0.486853	1.29757		Imm (day 7) 2	0.375203	0.269341	0.717853		Imm (day 7) 2	0.375203	0.211153	0.56277
Imm (day 7) 3	0.334656	0.229491	0.685753		Imm (day 7) 3	0.334656	0.261881	0.782538		Imm (day 7) 3	0.334656	0.2074	0.619741		Imm (day 7) 3	0.334656	0.275165	0.822232		Imm (day 7) 3	0.334656	0.580059	1.7333		Imm (day 7) 3	0.334656	0.229602	0.686084		Imm (day 7) 3	0.334656	0.229311	0.685215
Imm (day 7) 4	0.517924	0.791535	1.52829		Imm (day 7) 4	0.517924	0.791535	1.52829		Imm (day 7) 4	0.517924	0.791535	1.52829		Imm (day 7) 4					Imm (day 7) 4	0.517924	0.791535	1.52829		Imm (day 7) 4	0.517924	0.791535	1.52829		Imm (day 7) 4
Imm (day 7) 5	0.484869	0.549408	1.13311		Imm (day 7) 5	0.484869	0.549408	1.13311		Imm (day 7) 5	0.484869	0.549408	1.13311		Imm (day 7) 5					Imm (day 7) 5	0.484869	0.549408	1.13311		Imm (day 7) 5	0.484869	0.549408	1.13311		Imm (day 7) 5
Imm (day 7) 6	0.34452	0.436393	1.26667		Imm (day 7) 6	0.34452	0.436393	1.26667		Imm (day 7) 6	0.34452	0.436393	1.26667		Imm (day 7) 6					Imm (day 7) 6	0.34452	0.436393	1.26667		Imm (day 7) 6	0.34452	0.436393	1.26667		Imm (day 7) 6

## Sheet: S1H-N
(H–N) RT and real-time PCR analysis of TNF-a, MCP-1, IL-1b, IL-10, IL-15, FGF21, and irisin gene expression, respectively, in soleus of control mice and mice at the indicated times after bilateral cast immobilization (n = 5 or 6 per group).
	Gapdh	Il1b	Il1b/Gapdh			Gapdh	Il6	Il6/Gapdh			Gapdh	Il10	Il10/Gapdh			Gapdh	Il15	Il15/Gapdh			Gapdh	Tnfa	Tnfa/Gapdh			Gapdh	Mcp-1	Mcp-1/Gapdh			Gapdh	Irisin	Irisin/Gapdh			Gapdh	Fgf21	Fgf21/Gapdh
Control 1	0.0460839	0.100907	2.18965		Control 1	0.0460839	0.0840599	1.82406		Control 1	0.0460839	0.178681	3.87731		Control 1	0.0460839	0.172584	3.74499		Control 1	0.0460839	0.124261	2.69641		Control 1	0.0460839	0.0926485	2.01043		Control 1	0.0519133	0.120765	2.32629		Control 1	0.0460839	0.149131	3.23608
Control 2	0.0654096	0.116673	1.78373		Control 2	0.0654096	0.0457412	0.699304		Control 2	0.0654096	0.164697	2.51794		Control 2	0.0654096	0.188098	2.8757		Control 2	0.0654096	0.0916954	1.40186		Control 2	0.0654096	0.0783609	1.198		Control 2	0.0563686	0.22841	4.05207		Control 2	0.0654096	0.0683585	1.04508
Control 3	0.0654427	0.133345	2.03758		Control 3	0.0654427	0.087568	1.33809		Control 3	0.0654427	0.1419	2.16831		Control 3	0.0654427	0.230719	3.52551		Control 3	0.0654427	0.157689	2.40957		Control 3	0.0654427	0.112116	1.71319		Control 3	0.0660645	0.24857	3.76254		Control 3	0.0654427	0.119345	1.82365
Control 4	0.0286143	-	-		Control 4	0.0286143	-	-		Control 4	0.0286143	0.196319	6.86088		Control 4	0.0286143	-	-		Control 4	0.0286143	0.125139	4.37332		Control 4	0.0286143	0.10421	3.64189		Control 4	0.0824087	0.220838	2.67979		Control 4	0.0286143	0.095946	3.35308
Control 5	0.10042	0.245835	2.44808		Control 5	0.10042	0.0644586	0.641892		Control 5	0.10042	0.140373	1.39786		Control 5	0.10042	0.305456	3.0418		Control 5	0.10042	0.0678421	0.675586		Control 5	0.10042	0.079973	0.796388		Control 5	0.0778331	0.276951	3.55827		Control 5	0.10042	0.0593647	0.591166
Control 6	0.0809185	0.0783459	0.968207		Control 6	0.0809185	0.0795417	0.982985		Control 6	0.0809185	0.192525	2.37925		Control 6	0.0809185	0.2864	3.53937		Control 6	0.0809185	0.133005	1.6437		Control 6	0.0809185	0.113287	1.40001		Control 6	0.0822925	0.270149	3.28279		Control 6	0.0809185	0.115336	1.42534
Imm (10 h) 1	0.0798282	0.231644	2.90179		Imm (10 h) 1	0.0798282	0.170884	2.14065		Imm (10 h) 1	0.0798282	0.183584	2.29974		Imm (10 h) 1	0.0798282	0.342242	4.28723		Imm (10 h) 1	0.0798282	0.189721	2.37662		Imm (10 h) 1	0.0798282	0.168434	2.10996		Imm (10 h) 1	0.087395	0.240237	2.74886		Imm (10 h) 1	0.0798282	0.145632	1.82431
Imm (10 h) 2	0.0555835	0.0794215	1.42887		Imm (10 h) 2	0.0555835	0.112908	2.03133		Imm (10 h) 2	0.0555835	0.152912	2.75103		Imm (10 h) 2	0.0555835	0.247633	4.45516		Imm (10 h) 2	0.0555835	0.157242	2.82893		Imm (10 h) 2	0.0555835	0.136212	2.45059		Imm (10 h) 2	0.0802016	0.258004	3.21694		Imm (10 h) 2	0.0555835	0.131052	2.35775
Imm (10 h) 3	0.0559666	0.033434	0.597391		Imm (10 h) 3	0.0559666	0.0976181	1.74422		Imm (10 h) 3	0.0559666	0.140349	2.50773		Imm (10 h) 3	0.0559666	0.323932	5.78794		Imm (10 h) 3	0.0559666	0.130049	2.32369		Imm (10 h) 3	0.0559666	0.117653	2.1022		Imm (10 h) 3	0.0636033	0.186256	2.92839		Imm (10 h) 3	0.0559666	0.111435	1.99109
Imm (10 h) 4	0.0798931	0.201243	2.51891		Imm (10 h) 4	0.0798931	0.0753936	0.94368		Imm (10 h) 4	0.0798931	0.139303	1.74361		Imm (10 h) 4	0.0798931	0.463915	5.80669		Imm (10 h) 4	0.0798931	0.100636	1.25963		Imm (10 h) 4	0.0798931	0.10339	1.2941		Imm (10 h) 4	0.0676874	0.25919	3.82922		Imm (10 h) 4	0.0798931	0.0790252	0.989136
Imm (10 h) 5	0.0703076	-	-		Imm (10 h) 5	0.0703076	0.0467637	0.66513		Imm (10 h) 5	0.0703076	0.127148	1.80845		Imm (10 h) 5	0.0703076	0.356589	5.07184		Imm (10 h) 5	0.0703076	0.105482	1.50029		Imm (10 h) 5	0.0703076	0.103181	1.46756		Imm (10 h) 5	0.0583259	0.245141	4.20296		Imm (10 h) 5	0.0703076	0.101717	1.44675
Imm (10 h) 6	0.0452364	0.059377	1.31259		Imm (10 h) 6	0.0452364	0.0390201	0.86258		Imm (10 h) 6	0.0452364	0.129555	2.86396		Imm (10 h) 6	0.0452364	0.168134	3.71678		Imm (10 h) 6	0.0452364	0.0859806	1.90069		Imm (10 h) 6	0.0452364	0.0806503	1.78286		Imm (10 h) 6	0.0399713	0.214303	5.36142		Imm (10 h) 6	0.0452364	0.0749792	1.6575
Imm (24 h) 1	0.058617	0.0609895	1.04047		Imm (24 h) 1	0.058617	0.0974322	1.66218		Imm (24 h) 1	0.058617	0.194313	3.31496		Imm (24 h) 1	0.058617	0.207834	3.54563		Imm (24 h) 1	0.058617	0.109511	1.86825		Imm (24 h) 1	0.058617	0.123173	2.10131		Imm (24 h) 1	0.0569127	0.177392	3.11692		Imm (24 h) 1	0.058617	0.139605	2.38165
Imm (24 h) 2	0.0505273	0.0913015	1.80697		Imm (24 h) 2	0.0505273	0.0852091	1.6864		Imm (24 h) 2	0.0505273	0.1715	3.39421		Imm (24 h) 2	0.0505273	0.153845	3.0448		Imm (24 h) 2	0.0505273	0.114361	2.26336		Imm (24 h) 2	0.0505273	0.0998546	1.97625		Imm (24 h) 2	0.0454535	0.130604	2.87335		Imm (24 h) 2	0.0505273	0.104343	2.06508
Imm (24 h) 3	0.0484644	-	-		Imm (24 h) 3	0.0484644	0.12489	2.57695		Imm (24 h) 3	0.0484644	0.193263	3.98774		Imm (24 h) 3	0.0484644	0.144861	2.98903		Imm (24 h) 3	0.0484644	0.122624	2.53019		Imm (24 h) 3	0.0484644	0.0936921	1.93321		Imm (24 h) 3	0.05557	0.16108	2.89868		Imm (24 h) 3	0.0484644	0.145686	3.00605
Imm (24 h) 4	0.05498	0.178582	3.24812		Imm (24 h) 4	0.05498	0.0769061	1.3988		Imm (24 h) 4	0.05498	0.137044	2.4926		Imm (24 h) 4	0.05498	0.217597	3.95775		Imm (24 h) 4	0.05498	0.0976837	1.77671		Imm (24 h) 4	0.05498	0.0988824	1.79851		Imm (24 h) 4	0.0555589	0.284552	5.12163		Imm (24 h) 4	0.05498	0.0641438	1.16667
Imm (24 h) 5	0.0397523	0.0724354	1.82217		Imm (24 h) 5	0.0397523	0.11641	2.92839		Imm (24 h) 5	0.0397523	0.136371	3.43051		Imm (24 h) 5	0.0397523	0.148551	3.7369		Imm (24 h) 5	0.0397523	0.124691	3.1367		Imm (24 h) 5	0.0397523	0.100797	2.53563		Imm (24 h) 5	0.0479397	0.115158	2.40214		Imm (24 h) 5	0.0397523	0.120768	3.038
Imm (24 h) 6	0.0623451	0.186036	2.98397		Imm (24 h) 6	0.0623451	0.217183	3.48356		Imm (24 h) 6	0.0623451	0.280014	4.49136		Imm (24 h) 6	0.0623451	0.163138	2.6167		Imm (24 h) 6	0.0623451	0.215536	3.45714		Imm (24 h) 6	0.0623451	0.157311	2.52323		Imm (24 h) 6	0.0807878	0.219069	2.71166		Imm (24 h) 6	0.0623451	0.184583	2.96067
Imm (day 3) 1	0.0489579	0.145752	2.97708		Imm (day 3) 1	0.0489579	0.298348	6.09397		Imm (day 3) 1	0.0489579	0.219007	4.47337		Imm (day 3) 1	0.0489579	0.210536	4.30036		Imm (day 3) 1	0.0489579	0.298509	6.09726		Imm (day 3) 1	0.0489579	0.202461	4.13542		Imm (day 3) 1	0.0715369	0.113434	1.58567		Imm (day 3) 1	0.0489579	0.228604	4.66941
Imm (day 3) 2	0.0720743	-	-		Imm (day 3) 2	0.0720743	-	-		Imm (day 3) 2	0.0720743	-	-		Imm (day 3) 2	0.0720743	0.279088	3.87222		Imm (day 3) 2	0.0720743	0.0134439	0.186528		Imm (day 3) 2	0.0720743	0.029646	0.411325		Imm (day 3) 2	0.0742682	0.272463	3.66864		Imm (day 3) 2	0.0720743	0.0110054	0.152695
Imm (day 3) 3	0.0517	0.0958899	1.85474		Imm (day 3) 3	0.0517	0.0411256	0.795467		Imm (day 3) 3	0.0517	0.132253	2.55808		Imm (day 3) 3	0.0517	0.085227	1.64849		Imm (day 3) 3	0.0517	0.0722642	1.39776		Imm (day 3) 3	0.0517	0.0655322	1.26755		Imm (day 3) 3	0.0548609	0.127556	2.32509		Imm (day 3) 3	0.0517	0.0636329	1.23081
Imm (day 3) 4	0.0657859	0.360478	5.47955		Imm (day 3) 4	0.0657859	0.17443	2.65148		Imm (day 3) 4	0.0657859	0.202059	3.07146		Imm (day 3) 4	0.0657859	0.144474	2.19612		Imm (day 3) 4	0.0657859	0.19941	3.03119		Imm (day 3) 4	0.0657859	0.169475	2.57615		Imm (day 3) 4	0.0661519	0.0962716	1.45531		Imm (day 3) 4	0.0657859	0.162787	2.47449
Imm (day 3) 5	0.0578573	0.124387	2.1499		Imm (day 3) 5	0.0578573	0.110409	1.9083		Imm (day 3) 5	0.0578573	0.280987	4.85656		Imm (day 3) 5	0.0578573	0.155357	2.68518		Imm (day 3) 5	0.0578573	0.150138	2.59497		Imm (day 3) 5	0.0578573	0.142622	2.46506		Imm (day 3) 5	0.0492443	0.0920582	1.86942		Imm (day 3) 5	0.0578573	0.15423	2.6657
Imm (day 3) 6	0.0623626	0.151585	2.43071		Imm (day 3) 6	0.0623626	0.112507	1.80408		Imm (day 3) 6	0.0623626	0.207771	3.33166		Imm (day 3) 6	0.0623626	0.0574535	0.921281		Imm (day 3) 6	0.0623626	0.206137	3.30545		Imm (day 3) 6	0.0623626	0.160383	2.57179		Imm (day 3) 6	0.0531165	0.0499846	0.941038		Imm (day 3) 6	0.0623626	0.196198	3.14609
Imm (day 5) 1	0.0555774	0.102133	1.83767		Imm (day 5) 1	0.0555774	0.112924	2.03183		Imm (day 5) 1	0.0555774	0.25087	4.51389		Imm (day 5) 1	0.0555774	0.122254	2.1997		Imm (day 5) 1	0.0555774	0.187503	3.37373		Imm (day 5) 1	0.0555774	0.150048	2.6998		Imm (day 5) 1	0.04202	0.0892258	2.12341		Imm (day 5) 1	0.0555774	0.205072	3.68984
Imm (day 5) 2	0.0374358	0.0635413	1.69734		Imm (day 5) 2	0.0374358	0.0754509	2.01548		Imm (day 5) 2	0.0374358	0.178817	4.77664		Imm (day 5) 2	0.0374358	0.114122	3.04847		Imm (day 5) 2	0.0374358	0.106049	2.83281		Imm (day 5) 2	0.0374358	0.0857332	2.29014		Imm (day 5) 2	0.0469724	0.0642858	1.36859		Imm (day 5) 2	0.0374358	0.136824	3.6549
Imm (day 5) 3	0.0570156	0.155487	2.7271		Imm (day 5) 3	0.0570156	0.250347	4.39086		Imm (day 5) 3	0.0570156	0.255903	4.48829		Imm (day 5) 3	0.0570156	0.170569	2.99162		Imm (day 5) 3	0.0570156	0.26481	4.64452		Imm (day 5) 3	0.0570156	0.216292	3.79355		Imm (day 5) 3	0.067543	0.0721069	1.06757		Imm (day 5) 3	0.0570156	0.176731	3.0997
Imm (day 5) 4	0.077816	-	-		Imm (day 5) 4	0.077816	0.257307	3.30661		Imm (day 5) 4	0.077816	0.240891	3.09565		Imm (day 5) 4	0.077816	0.153626	1.97422		Imm (day 5) 4	0.077816	0.365216	4.69333		Imm (day 5) 4	0.077816	0.293776	3.77527		Imm (day 5) 4	0.0793607	0.0850484	1.07167		Imm (day 5) 4	0.077816	0.322167	4.14011
Imm (day 5) 5	0.0681701	0.15499	2.27358		Imm (day 5) 5	0.0681701	0.210311	3.08509		Imm (day 5) 5	0.0681701	0.176311	2.58635		Imm (day 5) 5	0.0681701	0.152311	2.23428		Imm (day 5) 5	0.0681701	0.326326	4.78694		Imm (day 5) 5	0.0681701	0.245083	3.59516		Imm (day 5) 5	0.0608549	0.0887953	1.45913		Imm (day 5) 5	0.0681701	0.196735	2.88594
Imm (day 5) 6	0.0752484	0.11877	1.57837		Imm (day 5) 6	0.0752484	0.277267	3.68469		Imm (day 5) 6	0.0752484	0.240791	3.19995		Imm (day 5) 6	0.0752484	0.132787	1.76465		Imm (day 5) 6	0.0752484	0.272932	3.62708		Imm (day 5) 6	0.0752484	0.228651	3.03862		Imm (day 5) 6	0.0929801	0.0896285	0.963954		Imm (day 5) 6	0.0752484	0.177611	2.36033
Imm (day 7) 1	0.0651738	0.37931	5.81998		Imm (day 7) 1	0.0651738	0.332208	5.09726		Imm (day 7) 1	0.0651738	0.244361	3.74938		Imm (day 7) 1	0.0651738	0.11587	1.77786		Imm (day 7) 1	0.0651738	0.44375	6.80871		Imm (day 7) 1	0.0651738	0.348203	5.34268		Imm (day 7) 1	0.085726	0.0919707	1.07284		Imm (day 7) 1	0.0651738	0.308065	4.72682
Imm (day 7) 2	0.0503187	0.339884	6.75463		Imm (day 7) 2	0.0503187	0.266967	5.30552		Imm (day 7) 2	0.0503187	0.291244	5.78799		Imm (day 7) 2	0.0503187	0.158389	3.14773		Imm (day 7) 2	0.0503187	0.413283	8.21331		Imm (day 7) 2	0.0503187	0.462835	9.19809		Imm (day 7) 2	0.0562233	0.0794858	1.41375		Imm (day 7) 2	0.0503187	0.312628	6.21297
Imm (day 7) 3	0.0991879	0.200145	2.01784		Imm (day 7) 3	0.0991879	0.333229	3.35958		Imm (day 7) 3	0.0991879	0.223429	2.25259		Imm (day 7) 3	0.0991879	0.196021	1.97626		Imm (day 7) 3	0.0991879	0.365147	3.68137		Imm (day 7) 3	0.0991879	0.33475	3.3749		Imm (day 7) 3	0.103637	0.0917788	0.885582		Imm (day 7) 3	0.0991879	0.275392	2.77646
Imm (day 7) 4	0.060158	0.12577	2.09066		Imm (day 7) 4	0.060158	0.296465	4.92811		Imm (day 7) 4	0.060158	0.249285	4.14384		Imm (day 7) 4	0.060158	0.179726	2.98756		Imm (day 7) 4	0.060158	0.257324	4.27747		Imm (day 7) 4	0.060158	0.243072	4.04055		Imm (day 7) 4	0.0715944	0.114261	1.59595		Imm (day 7) 4	0.060158	0.214115	3.55921
Imm (day 7) 5	0.0534683	0.23656	4.4243		Imm (day 7) 5	0.0534683	0.257136	4.80914		Imm (day 7) 5	0.0534683	0.253004	4.73185		Imm (day 7) 5	0.0534683	0.152292	2.84826		Imm (day 7) 5	0.0534683	0.337954	6.32064		Imm (day 7) 5	0.0534683	0.37574	7.02734		Imm (day 7) 5	0.0492584	0.0531485	1.07897		Imm (day 7) 5	0.0534683	0.307989	5.76023
Imm (day 7) 6	0.0558462	0.292534	5.23822		Imm (day 7) 6	0.0558462	0.227926	4.08131		Imm (day 7) 6	0.0558462	0.236774	4.23975		Imm (day 7) 6	0.0558462	0.108758	1.94746		Imm (day 7) 6	0.0558462	0.262217	4.69535		Imm (day 7) 6	0.0558462	0.384536	6.88564		Imm (day 7) 6	0.0557233	0.0607237	1.08974		Imm (day 7) 6	0.0558462	0.249987	4.47636
					Gypsum (day 7) 7	0.0532301	0.226101	4.24762																						Gypsum (day 7) 7	0.0532301	0.0270571	0.508305

## Sheet: S1O-Q
(O–Q) RT and real-time PCR analysis of Il6 expression in liver (O), eWAT (P), and spleen (Q) of control mice and mice at the indicated times after bilateral cast immobilization (n = 5-6 per group).
Liver					eWAT					Spleen
	Gapdh	Il6	Il6/Gapdh			Gapdh	Il6	Il6/Gapdh			Gapdh	Il6	Il6/Gapdh
Control 1	0.409913	0.32346	0.789096		Control 1	0.525189	0.431	0.820657		Control 1	0.334137	0.327346	0.979678
Control 2	0.581773	0.455563	0.783061		Control 2	0.284872	0.292237	1.02585		Control 2	0.346016	0.32782	0.947412
Control 3	0.381727	0.297325	0.778895		Control 3	0.235954	0.210997	0.894231		Control 3	0.323863	0.24435	0.754486
Control 4	0.348952	0.414244	1.18711		Control 4	0.232012	0.192924	0.831527		Control 4	0.305156	0.249294	0.816938
Control 5	0.327805	0.22919	0.699165		Control 5	0.392542	0.369707	0.941827		Control 5	0.314921	0.254596	0.808444
Control 6	0.369175	0.541805	1.46761		Control 6	0.452151	0.404901	0.895501		Control 6	0.279304	0.217251	0.77783
Imm (10 h) 1	0.515985	0.295896	0.573458		Imm (10 h) 1	0.380035	0.241429	0.635282		Imm (6 h) 1	0.425611	0.349587	0.821376
Imm (10 h) 2	0.412407	0.335917	0.814528		Imm (10 h) 2	0.385996	0.336336	0.871345		Imm (6 h) 2	0.257381	0.209091	0.812379
Imm (10 h) 3	0.423172	0.46069	1.08866		Imm (10 h) 3	0.355211	0.361589	1.01795		Imm (6 h) 3	0.159182	0.151902	0.954264
Imm (10 h) 4	0.756738	0.367345	0.485432		Imm (10 h) 4	0.451879	0.445488	0.985856		Imm (6 h) 4	0.385078	0.341222	0.886111
Imm (10 h) 5	0.437532	0.372879	0.852232		Imm (10 h) 5	0.353214	0.423546	1.19912		Imm (6 h) 5	0.283254	0.291113	1.02775
Imm (10 h) 6	0.433606	0.286203	0.660053		Imm (10 h) 6	0.175584	0.138497	0.788777		Imm (6 h) 6	0.269477	0.266027	0.987196
Imm (24 h) 1	0.443826	0.338952	0.763704		Imm (24 h) 1	0.444202	0.388889	0.875477		Imm (10 h) 1	0.247956	0.23431	0.944967
Imm (24 h) 2	0.541398	0.562934	1.03978		Imm (24 h) 2	0.797046	0.810269	1.01659		Imm (10 h) 2	0.348978	0.353819	1.01387
Imm (24 h) 3	0.461045	0.655105	1.42091		Imm (24 h) 3	0.188168	0.134257	0.713495		Imm (10 h) 3	0.285339	0.231451	0.811142
Imm (24 h) 4	0.305194	0.241756	0.792136		Imm (24 h) 4	0.200904	0.138584	0.689804		Imm (10 h) 4	0.316892	0.253241	0.799141
Imm (24 h) 5	0.43497	0.523812	1.20425		Imm (24 h) 5	0.113802	0.0854738	0.751078		Imm (10 h) 5	0.294948	0.271156	0.919335
Imm (24 h) 6	0.459925	0.525032	1.14156		Imm (24 h) 6	0.358946	0.399286	1.11238		Imm (24 h) 1	0.364256	0.316374	0.868549
Imm (day 3) 1	0.496016	0.57327	1.15575		Imm (day 3) 1	0.46026	0.407128	0.88456		Imm (24 h) 2	0.414707	0.389846	0.940053
Imm (day 3) 2	0.403984	0.351467	0.870002		Imm (day 3) 2	0.345943	0.354095	1.02357		Imm (24 h) 3	0.367686	0.340304	0.925528
Imm (day 3) 3	0.55476	0.564653	1.01783		Imm (day 3) 3	0.445006	0.444966	0.99991		Imm (24 h) 4	0.157337	0.126639	0.804893
Imm (day 3) 4	0.390893	0.643274	1.64565		Imm (day 3) 4	0.249667	0.27496	1.10131		Imm (24 h) 5	0.329182	0.300361	0.912448
Imm (day 3) 5	0.408483	0.377288	0.923632		Imm (day 3) 5	0.515247	0.452961	0.879113		Imm (24 h) 6	0.298159	0.257347	0.86312
Imm (day 3) 6	0.568773	0.636373	1.11885		Imm (day 3) 6	0.473451	0.489849	1.03463		Imm (day 3) 1	0.775277	0.598356	0.771797
Imm (day 5) 1	0.49973	0.227551	0.455349		Imm (day 5) 1	0.636123	0.457585	0.719335		Imm (day 3) 2	0.835119	0.73565	0.880893
Imm (day 5) 2	0.526762	0.286376	0.543652		Imm (day 5) 2	0.405583	0.339426	0.836886		Imm (day 3) 3	0.681494	0.718131	1.05376
Imm (day 5) 3	0.449816	0.22549	0.501295		Imm (day 5) 3	0.696232	0.426335	0.612346		Imm (day 3) 4	0.667135	0.733752	1.09985
Imm (day 5) 4	0.403226	0.247206	0.613069		Imm (day 5) 4	0.759109	0.65165	0.85844		Imm (day 3) 5	0.745542	0.60375	0.809813
Imm (day 5) 5	0.443253	0.21668	0.488841		Imm (day 5) 5	0.837528	0.455469	0.543826		Imm (day 3) 6	0.903687	0.798506	0.883609
Imm (day 5) 6	0.52959	0.261941	0.494611		Imm (day 5) 6	0.808147	0.46429	0.574513		Imm (day 5) 1	0.894452	0.866233	0.968451
Imm (day 7) 1	0.471039	0.281908	0.598481		Imm (day 7) 1	0.809365	0.60542	0.748018		Imm (day 5) 2	0.729143	0.513848	0.704729
Imm (day 7) 2	0.411731	0.287912	0.699273		Imm (day 7) 2	0.627428	0.584927	0.932261		Imm (day 5) 3	0.841702	0.848566	1.00815
Imm (day 7) 3	0.546094	0.281341	0.515188		Imm (day 7) 3	0.67685	0.435687	0.643698		Imm (day 5) 4	0.770729	0.666836	0.865202
Imm (day 7) 4	0.343222	0.260367	0.758597		Imm (day 7) 4	1.29248	1.14092	0.882736		Imm (day 5) 5	0.609246	0.60375	0.990979
Imm (day 7) 5	0.527314	0.199211	0.377784		Imm (day 7) 5	0.696582	0.403137	0.578735		Imm (day 5) 6	0.878363	0.716139	0.815311
Imm (day 7) 6	0.746381	0.984337	1.31881		Imm (day 7) 6	0.744757	0.469903	0.630948

## Sheet: S1R
(R) Serum concentration of TNF-a in control mice and mice at the indicated times after bilateral cast immobilization (n = 6 per group).
conc. (pg/ml)	Abs.1	Abs.2	Abs.	Abs.-blank		sample	Abs.	Abs.-blank	conc. (pg/ml)
1000	2.741	2.811	2.776	2.711		Control 1	0.149	0.084	7.96241
500	1.049	2.087	2.087	1.503		Control 2	0.129	0.064	6.45865
250	1.157	1.754	1.754	1.3905		Control 3	0.118	0.053	5.63158
125	-	1.244	1.244	1.179		Control 4	0.117	0.052	5.55639
62.5	1.013	0.759	0.886	0.821		Control 5	0.125	0.06	6.15789
31.25	0.378	0.5	0.439	0.374		Control 6	0.12	0.055	5.78195
15.625	0.195	0.309	0.252	0.187		Imm (10 h) 1	0.117	0.052	5.55639
7.8125	0.156	0.109	0.1325	0.0675		Imm (10 h) 2	0.16	0.095	8.78947
0	0.065	0.065	0.065	0		Imm (10 h) 3	0.14	0.075	7.28571
						Imm (10 h) 4	0.116	0.051	5.4812
						Imm (10 h) 5	0.121	0.056	5.85714
						Imm (10 h) 6	0.143	0.078	7.51128
						Imm (24 h) 1	0.135	0.07	6.90977
						Imm (24 h) 2	0.114	0.049	5.33083
						Imm (24 h) 3	0.107	0.042	4.80451
						Imm (24 h) 4	0.134	0.069	6.83459
						Imm (24 h) 5	0.115	0.05	5.40602
						Imm (24 h) 6	0.109	0.044	4.95489
						Imm (day 3) 1	0.097	0.032	4.05263
						Imm (day 3) 2	0.124	0.059	6.08271
						Imm (day 3) 3	0.118	0.053	5.63158
						Imm (day 3) 4	0.118	0.053	5.63158
						Imm (day 3) 5	0.101	0.036	4.35338
						Imm (day 3) 6	0.159	0.094	8.71429
						Imm (day 5) 1	0.102	0.037	4.42857
						Imm (day 5) 2	0.093	0.028	3.75188
						Imm (day 5) 3	0.108	0.043	4.8797
						Imm (day 5) 4	0.109	0.044	4.95489
						Imm (day 5) 5	0.103	0.038	4.50376
						Imm (day 5) 6	0.122	0.057	5.93233
						Imm (day 7) 1	0.098	0.033	4.12782
						Imm (day 7) 2	0.098	0.033	4.12782
						Imm (day 7) 3	0.105	0.04	4.65414
						Imm (day 7) 4	0.103	0.038	4.50376
						Imm (day 7) 5	0.111	0.046	5.10526
						Imm (day 7) 6	0.093	0.028	3.75188
