# Supplementary material for: Brown adipose tissue and skeletal muscle coordinately contribute to thermogenesis in mice
Source: eLife. 2025 Oct 27;13:RP99982. doi: 10.7554/eLife.99982 (PMC12558653; doi:10.7554/eLife.99982)
Supplement: Figure 5—source data 1. [file elife-99982-fig5-data1.xlsx]

## Sheet: Fig.5A
(A) Change in rectal body temperature during cold exposure at 4°C for 4 h for WT (n = 4 or 5) and IL-6 KO (n = 4 or 5) mice that had been subjected (or not) to bilateral cast immobilization for 24 h.
WT				KO
	0 (h)	4 (h)			0 (h)	4 (h)
Control 1	0	-0.9		Control 1	0	-1
Control 2	0	-1.5		Control 2	0	0.1
Control 3	0	-1.1		Control 3	0	-3.3
Control 4	0	-1.5		Control 4	0	-2.2
Control 5	0	-0.1		Control 5	0	-2.5
Imm 1	0	-1.2		Control 6	0	-2
Imm 2	0	-1.5		Imm 1	0	-2.6
Imm 3	0	-2.6		Imm 2	0	-8
Imm 4	0	-2.4		Imm 3	0	-6.5
				Imm 4	0	-1.7

## Sheet: Fig.5B-C
(B and C) Concentrations of carbohydrate metabolites (B) and amino acids (C) in iBAT of IL-6 KO (–/–) and WT (+/+) mice without (control) or with bilateral cast immobilization for the indicated times.
n mol /g tissue weight	WT												KO
	Control 1	Control 2	Control 3	Control 4	Imm (24 h) 1	Imm (24 h) 2	Imm (24 h) 3	Imm (24 h) 4	Imm (day 7) 1	Imm (day 7) 2	Imm (day 7) 3	Imm (day 7) 4	Control 1	Control 2	Control 3	Control 4	Imm (24 h) 1	Imm (24 h) 2	Imm (24 h) 3	Imm (24 h) 4	Imm (day 7) 1	Imm (day 7) 2	Imm (day 7) 3	Imm (day 7) 4
Glucose 6-phosphate	122.916	234.471	146.727	122.095	340.168	280.243	218.162	235.654	48.8313	1303.18	221.424	199.402	154.257	191.645	252.888	123.814	254.95	173.661	146.6	251.541	62.1703	146.888	122.872	58.9056
Fructose 6-phosphate	27.8849	62.4043	38.4487	29.5771	82.4084	74.4648	53.5593	52.9349	12.6032	301.415	48.8161	48.8093	33.2769	42.4424	62.7787	30.2687	63.9636	45.3977	34.6728	56.2048	15.4333	35.8348	29.2518	19.5978
Fructose 1,6-diphosphate	19.8721	50.6267	33.6891	25.7367	118.273	222.356	67.315	173.732	3.93309	116.933	58.2952	107.116	13.1907	66.1718	103.695	46.6234	105.132	89.3905	57.4453	95.0151	17.9144	88.3565	26.963	21.9662
3-Phosphoglyceric acid	0.270266	0.171519	0.0739138	0.121815	0.139139	0.196002	0.16624	0.17348	0.16226	0.293278	0.232412	0.30754	0.110409	0.38302	0.232806	0.171824	0.257775	0.138615	0.302419	0.124826	0.200921	0.126663	0.181069	0.173318
2-Phosphoglyceric acid	107.702	13.3734	23.5849	23.1549	29.0567	39.7502	19.8725	40.0288	22.2206	217.779	18.8791	21.1846	30.3718	45.9597	35.3012	35.9369	24.3833	32.2869	36.8596	28.5844	25.0197	36.573	44.0451	26.0385
Phosphoenolpyruvic acid	0.551485	0.383047	0.310421	0.441687	0.566774	0.702539	0.429925	0.571976	0.434913	0.677222	0.618805	0.672927	0.444335	1.05208	0.802031	0.588773	0.702068	0.46749	0.974267	0.430286	0.630897	0.589087	0.684718	0.695849
Lactic acid	12684	9421.34	11121	13028.4	12383.6	11379.7	11715.7	13185.3	6851.03	112303	11020.1	10375.6	9161.06	13670.3	14086.8	12085.5	13803.7	12257.4	12872	13546.3	8391.53	13279.2	10484.8	8624.53
6-Phosphogluconic acid	10.7549	16.9105	10.376	9.96073	20.0186	26.3691	22.7104	23.0865	16.3354	113.896	17.2868	14.0556	13.6981	18.0931	22.6059	8.42734	21.348	9.06948	6.41526	14.3801	4.07456	20.2336	6.69334	2.1479
Sedoheptulose 7-phosphate	0.340778	0.723339	0.757709	0.482975	1.01688	0.787599	0.808557	0.989586	1.08451	0.690076	0.658409	0.704044	1.10273	0.696586	1.04919	0.642838	1.07123	0.864843	0.738576	0.931482	0.491998	0.611769	0.701391	0.554578
Acetyl CoA_divalent	80.1164	14.6138	22.4864	60.1473	65.1517	32.6221	57.0687	63.7235	3.10133	114.809	18.2817	55.653	6.58185	58.6533	34.2843	39.2877	67.1431	97.9301	74.9096	81.5509	54.0111	63.4902	26.7274	60.3211
Citric acid	36.8461	197.912	67.4407	32.456	45.2219	65.9996	33.1804	75.2953	4.96126	213.917	49.7693	88.8468	31.5372	48.6837	124.543	60.8221	78.655	51.9497	34.7656	52.2127	3.88145	30.857	25.3956	29.1526
Malic acid	4.74998	18.6969	12.3084	7.08376	9.79412	16.1489	5.95779	18.7663	2.10849	4.9243	9.97332	17.2828	9.48979	11.6731	17.4828	12.956	10.7572	17.4054	14.1598	12.9798	4.82902	6.15147	8.56299	24.6586
Glucose 1-phosphate	18.4293	28.6375	17.9276	15.7254	41.1461	41.4202	27.2042	33.7283	15.1569	240.143	28.589	29.5127	24.1368	28.5483	35.7268	20.0857	46.3363	31.8604	22.5403	35.5202	7.78593	26.7465	18.5996	16.039
Glycerol 3-phosphate	0.960499	0.980029	1.04132	1.64345	0.858501	1.38447	1.08633	1.62234	1.22557	0.843339	0.848731	1.67589	0.810509	1.34612	1.58988	6.03252	0.924069	1.60126	2.26159	0.857666	6.93082	2.13156	1.28569	47.6801
n mol /g tissue weight	WT												KO
	Control 1	Control 2	Control 3	Control 4	Imm (24 h) 1	Imm (24 h) 2	Imm (24 h) 3	Imm (24 h) 4	Imm (day 7) 1	Imm (day 7) 2	Imm (day 7) 3	Imm (day 7) 4	Control 1	Control 2	Control 3	Control 4	Imm (24 h) 1	Imm (24 h) 2	Imm (24 h) 3	Imm (24 h) 4	Imm (day 7) 1	Imm (day 7) 2	Imm (day 7) 3	Imm (day 7) 4
Gly	1281.93	1024.65	1012.28	1217.77	1254.93	1311.84	1164.79	1461.5	885.628	1069.47	1151.38	1079.82	963.329	1052.31	1099.22	1044.95	1151.72	1401.4	1111.02	1235.44	831.514	1273.9	1133.86	1161.91
Ala	2330.35	3072.1	2814.18	1849.29	2418.66	2230.38	2238.7	2305.21	1748.74	1838.25	2100.84	1761.89	2691.41	2561.73	2270.66	2212	2458.36	2376.47	2014.45	2462.16	1592.92	2267.17	2220.37	2020.07
Ser	755.771	584.16	458.546	689.991	859.937	721	771.203	693.625	233.517	407.606	577.44	612.04	465.534	539.63	657.491	615.16	637.169	674.161	582.562	680.881	452.945	704.55	540.839	535.285
Pro	228.459	217.399	151.22	198.404	227.772	221.985	217.405	206.189	124.277	178.184	195.239	173.44	193.275	167.745	203.268	182.632	199.201	196.324	165.273	210.131	120.678	207.948	185.785	164.091
Val	376.296	358.241	236.76	386.19	386.196	338.929	324.58	338.447	135.281	249.21	339.116	357.187	333.386	349.96	372.818	281.407	308.711	281.706	256.388	301.235	245.94	398.066	281.972	276.259
Thr	548.947	438.168	345.504	470.056	643.447	496.956	462.995	504.352	185.818	356	426.638	376.048	398.954	387.304	493.578	447.497	488.545	425.282	425.601	462.099	313.503	485.193	397.814	361.132
Ile	172.115	197.285	114.06	184.453	191.278	182.427	166.22	187.212	77.3034	136.705	157.709	193.993	179.742	184.005	196.606	130.658	143.214	130.788	133.023	151.687	121.944	198.741	127.378	114.948
Leu	450.091	415.999	252.601	465.37	488.509	436.144	417.221	431.703	127.25	276.094	414.688	449.536	344.475	416.52	443.296	316.058	350.408	320.555	320.975	402.406	296.755	471.513	285.471	271.7
Asn	136.786	83.0709	75.3015	125.738	128.634	139.07	147.288	137.078	50.7113	92.2377	119.997	147.35	96.7491	132.242	128.732	97.2064	128.77	116.534	110.492	122.759	100.542	128.24	109.115	81.8304
Asp	274.072	455.451	378.204	240.533	304.377	321.287	313.419	341.65	289.231	346.509	354.552	466.885	411.943	468.743	452.103	288.825	251.772	276.691	293.358	308.114	255.028	297.1	397.864	309.181
Gln	2772.39	1696.43	1589.87	1984.01	2364.65	2128.61	2192.28	2006.33	1313.98	1882.04	2195.62	1699.14	1973.89	1852.16	1974.05	2292.85	1879.87	1904.37	2163.51	2030.6	1423.53	1579.85	1472.37	1647.06
Lys	488.527	447.374	278.19	487.09	566.524	561.722	499.675	514.207	181.709	326.219	451.082	430.784	360.862	386.562	495.19	387.529	490.224	377.346	424.152	448.678	309.714	463.241	370.484	354.596
Glu	883.03	828.407	1200.7	861.293	946.211	999.172	925.839	983.933	573.276	631.575	755.422	903.112	999.402	1478.62	1240.34	1214.43	845.059	976.235	1074.33	1056.94	699.241	923.154	650.911	1189.82
Met	71.6653	65.5594	38.6557	78.6945	79.8194	78.3717	82.4946	74.8608	22.5736	36.9483	56.2977	59.3249	33.2449	38.2261	47.5828	39.8255	25.6057	39.1827	31.9947	38.5161	29.3779	42.424	26.3074	17.5843
His	176.586	154.009	79.3748	156.436	183.562	172.775	189.914	179.74	48.3271	68.2125	133.559	141.42	119.316	141.434	155.992	137.677	144.52	113.134	118.079	141.187	89.6464	157.438	112.01	103.216
Phe	198.877	190.002	118.667	199.783	208.043	214.379	215.263	210.232	82.6293	132.82	187.24	197.505	170.53	177.154	200.402	142.523	161.054	153.302	153.253	161.88	123.593	201.529	148.433	129.256
Arg	343.397	265.091	168.01	352.008	330.684	329.706	289.311	319.281	98.9206	174.337	296.72	256.122	210.925	246.854	310.791	272.506	236.306	247.812	247.005	284.5	227.977	251.532	264.283	265.265
Tyr	182.97	156.497	107.936	156.088	168.546	172.437	192.008	186.416	80.9573	124.992	140.039	144.019	144.615	152.225	187.48	141.162	156.018	140.453	135.363	164.544	118.499	175.267	152.454	142.649
Trp	37.1027	35.7009	24.0859	37.6606	31.7509	39.4656	37.833	39.3575	14.0133	27.4443	39.7402	37.8994	36.9365	39.5808	40.4628	33.2661	34.9064	32.7415	28.6068	37.3175	30.969	42.0414	39.3491	29.9765

## Sheet: Fig.5D-F
(D–F) RT and real-time PCR analysis of the expression of SLC25A44 (D), BCKDHA (E), and CD36 (F) genes in iBAT of IL-6 KO and WT mice without (control) or with bilateral cast immobilization for 24 h (n = 5 or 6).
		Gapdh	Slc25a44	Slc25a44/Gapdh				Gapdh	Bckdha	Bckdha/Gapdh				Gapdh	Cd36	Cd36/Gapdh
WT	Control 1	1.4707	1.8199	1.23744		WT	Control 1	1.4707	1.54599	1.05119		WT	Control 1	1.4707	2.10739	1.43292
	Control 2	1.5946	0.537456	0.337048			Control 2	1.5946	0.440276	0.276105			Control 2	1.5946	0.405897	0.254545
	Control 3	1.44678	0.64468	0.445598			Control 3	1.44678	0.548293	0.378976			Control 3	1.44678	0.645067	0.445865
	Control 4	1.29481	1.99571	1.54131			Control 4	1.29481	2.01522	1.55639			Control 4	1.29481	1.90609	1.47211
	Control 5	1.16905	1.57632	1.34838			Control 5	1.16905	1.39723	1.19518			Control 5	1.16905	1.80569	1.54458
	Control 6	1.48245	0.711127	0.479696			Control 6	1.48245	0.534454	0.36052			Control 6	1.48245	0.86906	0.586231
	Imm (24 h) 1	1.61906	3.53727	2.18476			Imm (24 h) 1	1.61906	4.18887	2.58722			Imm (24 h) 1	1.61906	2.85103	1.76091
	Imm (24 h) 2	2.11245	3.18462	1.50755			Imm (24 h) 2	2.11245	5.97093	2.82654			Imm (24 h) 2	2.11245	4.15579	1.96729
	Imm (24 h) 3	1.96425	3.73385	1.90091			Imm (24 h) 3	1.96425	6.45327	3.28537			Imm (24 h) 3	1.96425	4.46211	2.27167
	Imm (24 h) 4	1.66115	2.59962	1.56495			Imm (24 h) 4	1.66115	4.57729	2.75549			Imm (24 h) 4	1.66115	2.51258	1.51255
	Imm (24 h) 5	2.14634	4.9727	2.31682			Imm (24 h) 5	2.14634	6.93403	3.23062			Imm (24 h) 5	2.14634	5.00991	2.33416
KO	Control 1	1.64476	0.614671	0.373715		KO	Control 1	1.64476	0.491246	0.298674		KO	Control 1	1.64476	0.515744	0.313568
	Control 2	1.77512	2.59905	1.46416			Control 2	1.77512	3.30508	1.86189			Control 2	1.77512	3.82011	2.15203
	Control 3	1.59409	2.36461	1.48336			Control 3	1.59409	2.81527	1.76607			Control 3	1.59409	2.71569	1.70361
	Control 4	1.33762	2.15595	1.61178			Control 4	1.33762	2.00168	1.49645			Control 4	1.33762	2.41873	1.80823
	Control 5	1.64223	3.8791	2.36209			Control 5	1.64223	3.1066	1.8917			Control 5	1.64223	4.3023	2.6198
	Control 6	1.62032	4.85677	2.99741			Control 6	1.62032	4.35339	2.68675			Control 6	1.62032	5.25951	3.24597
	Imm (24 h) 1	2.09267	4.33618	2.07208			Imm (24 h) 1	2.09267	7.1389	3.41138			Imm (24 h) 1	2.09267	4.51092	2.15558
	Imm (24 h) 2	2.18835	4.16827	1.90475			Imm (24 h) 2	2.18835	6.98734	3.19297			Imm (24 h) 2	2.18835	4.89677	2.23765
	Imm (24 h) 3	2.0953	4.47845	2.13738			Imm (24 h) 3	2.0953	6.50504	3.10459			Imm (24 h) 3	2.0953	4.99521	2.38401
	Imm (24 h) 4	1.98151	3.70619	1.87039			Imm (24 h) 4	1.98151	5.92426	2.98977			Imm (24 h) 4	1.98151	3.6754	1.85485
	Imm (24 h) 5	2.53789	3.85592	1.51934			Imm (24 h) 5	2.53789	5.27052	2.07673			Imm (24 h) 5	2.53789	4.3964	1.7323

## Sheet: Fig.5G
(G) Incorporation of [3H]leucine in iBAT of IL-6 KO and WT mice without (control) or with bilateral cast immobilization for 24 h (n = 4 or 5 per group).
iBAT
	WT									KO
	Control 1	Control 2	Control 3	Control 4	Imm 1	Imm 2	Imm 3	Imm 4	Imm 5	Control 1	Control 2	Control 3	Control 4	Control 5	Imm 1	Imm 2	Imm 3	Imm 4	Imm 5	Imm 6
Tissue Weight(g)	0.023	0.021	0.023	0.043	0.032	0.033	0.039	0.044	0.041	0.035	0.033	0.024	0.022	0.025	0.037	0.03	0.026	0.029	0.03	0.026
dpm	14935.5	17687	17159.5	21083.3	39293.4	47056.5	47090.2	49843.8	24192.4	28716.4	19876.8	21605.8	17318.7	19053.9	28330.1	19445	16328	16016.5	17945.2	16207.2
dpm(-blank)	24767.3	29334.8	28459.1	34977.4	65201.4	78088.1	78131.4	82719.8	40138.5	47643.6	32957.2	35827.3	28710.7	31608.6	46989.7	32240.4	27078.8	26549.1	29768.2	26883.1
Bq	413.614	489.891	475.267	584.123	1088.86	1304.07	1304.79	1381.42	670.313	795.648	550.385	598.316	479.469	527.864	784.727	538.415	452.217	443.37	497.128	448.947
Bq/g tissue weight	17983.2	23328.1	20663.8	13584.2	34027	39517.3	33456.3	31395.9	16349.1	22732.8	16678.3	24929.8	21794.1	21114.5	21208.8	17947.2	17392.9	15288.6	16570.9	17267.2

## Sheet: Fig.5H-J
(H–J) BCAA (Val, Ile, and Leu, respectively) concentrations in soleus of IL-6 KO and WT mice without (control) or with bilateral cast immobilization for 1 or 7 days (n = 4 per group).
Soleus
n mole/g tissue weight		Valine	Isoleucine	Leucine
WT	Control 1	70.0691	139.93	273.265
	Control 2	217.449	100.044	194.877
	Control 3	222.45	104.321	197.207
	Control 4	214.67	97.5052	193.842
	Imm (24 h) 1	270.418	134.246	241.139
	Imm (24 h) 2	242.029	118.063	220.307
	Imm (24 h) 3	255.108	135.692	254.109
	Imm (24 h) 4	277.96	134.128	249.271
	Imm (day 7) 1	336.504	163.512	304.528
	Imm (day 7) 2	306.532	149.646	233.206
	Imm (day 7) 3	256.331	128.905	221.428
	Imm (day 7) 4	274.899	128.916	243.034
KO	Control 1	298.572	133.355	257.259
	Control 2	382.654	166.878	306.739
	Control 3	248.617	97.433	181.773
	Control 4	216.886	97.518	180.788
	Imm (24 h) 1	262.067	121.78	232.5
	Imm (24 h) 2	240.422	120.329	199.267
	Imm (24 h) 3	278.834	135.149	245.203
	Imm (24 h) 4	242.33	128.464	222.899
	Imm (day 7) 1	212.574	114.22	203.782
	Imm (day 7) 2	387.337	187.077	322.406
	Imm (day 7) 3	308.953	158.723	288.086
	Imm (day 7) 4	225.16	113.016	210.647

## Sheet: S1A
(A) RT and real-time PCR analysis of Ucp1 mRNA abundance in iBAT of WT and IL-6 KO mice without (control) or with bilateral cast immobilization for 1 or 7 days (n = 5 or 6 per group).
		Gapdh	Ucp1	Ucp1/Gapdh
WT	Control 1	1.4707	1.76498	1.2001
	Control 2	1.5946	0.32263	0.202327
	Control 3	1.44678	0.40069	0.276954
	Control 4	1.29481	1.35374	1.04551
	Control 5	1.16905	1.65523	1.41588
	Control 6	1.48245	0.604324	0.407651
	Imm (24 h) 1	1.61906	8.97187	5.5414
	Imm (24 h) 2	2.11245	9.61206	4.5502
	Imm (24 h) 3	1.96425	11.1588	5.68097
	Imm (24 h) 4	1.66115	7.55408	4.5475
	Imm (24 h) 5	2.14634	12.9077	6.0138
	Imm (day 7) 1	4.07613	0.373511	0.0916336
	Imm (day 7) 2	1.92748	1.03828	0.53867
	Imm (day 7) 3	6.26971	1.83209	0.292213
	Imm (day 7) 4	2.20372	2.61147	1.18503
	Imm (day 7) 5	2.10412	1.89323	0.899773
	Imm (day 7) 6	2.29627	1.58266	0.689232
KO	Control 1	1.64476	0.481195	0.292563
	Control 2	1.77512	3.34901	1.88664
	Control 3	1.59409	1.48938	0.934317
	Control 4	1.33762	1.94487	1.45397
	Control 5	1.64223	3.38792	2.063
	Control 6	1.62032	3.78199	2.3341
	Imm (24 h) 1	2.09267	12.1109	5.78731
	Imm (24 h) 2	2.18835	14.0108	6.40246
	Imm (24 h) 3	2.0953	14.3652	6.85591
	Imm (24 h) 4	1.98151	11.9865	6.04919
	Imm (24 h) 5	2.53789	16.1541	6.36517
	Imm (day 7) 1	2.44189	3.11844	1.27706
	Imm (day 7) 2	2.59694	3.92629	1.51189
	Imm (day 7) 3	2.48746	3.06274	1.23127
	Imm (day 7) 4	2.50294	4.02553	1.60832
	Imm (day 7) 5	2.73144	3.60992	1.32162

## Sheet: S1B-C
(B and C) Oxygen consumption rate for WT (B) and IL-6 KO (C) mice subjected (or not) to bilateral cast immobilization for 7 days (n = 4 per group).
		WT								KO
		Control 1	Control 2	Control 3	Control 4	Imm 1	Imm 2	Imm 3	Imm 4	Control 1	Control 2	Control 3	Control 4	Imm 1	Imm 2	Imm 3	Imm 4
Day 1	11:00:00	49.6617	56.6613	47.2529	53.2328	52.343	57.4222	46.348	67.6589	49.1866	72.8468	47.7115	64.5445	56.2707	58.3951	57.489	67.4715
	12:00:00	39.8381	50.7186	52.8396	45.3596	49.2246	50.9674	55.8686	58.1664	47.0604	54.3493	56.7277	46.2915	47.9709	50.7601	54.2054	57.6157
	13:00:00	39.8146	47.8601	38.7057	41.944	44.3222	53.1033	41.0376	47.6873	45.2216	53.5591	45.4125	45.042	50.9304	50.6397	44.8408	55.4869
	14:00:00	41.5403	52.643	40.6111	41.7306	43.3755	46.6977	48.1496	46.1999	47.6929	47.796	40.3189	46.5249	49.3045	47.6397	51.9758	52.3479
	15:00:00	40.6266	40.0721	45.258	39.251	38.1471	48.0685	43.5525	41.3413	50.9312	51.0859	44.5814	41.4012	52.2144	45.0614	46.858	53.1222
	16:00:00	38.5988	45.9005	43.6523	44.7375	45.3483	44.7945	42.4833	42.52	44.5583	51.9042	39.248	45.28	50.71	44.4797	45.6199	51.1954
	17:00:00	53.7814	50.6956	41.4253	46.2539	40.651	43.8109	38.7686	42.1508	52.2002	48.8495	44.98	46.2842	50.779	42.3654	45.1667	49.0371
	18:00:00	45.0821	51.0351	43.1802	41.9438	43.8401	43.9422	40.9022	47.583	51.3406	49.8574	43.4165	47.2459	53.8272	49.4962	44.6498	47.6397
	19:00:00	63.2022	57.2521	54.9275	59.5998	49.3667	51.2531	42.2327	53.3683	59.0742	56.6253	57.9811	58.406	57.3571	51.1109	47.4707	55.0143
	20:00:00	55.6987	64.2468	52.8974	55.5811	50.4002	51.4974	48.885	51.0592	56.2081	74.2075	59.9733	56.9623	56.7395	48.3374	49.5736	63.8266
	21:00:00	59.764	57.3977	56.8917	55.9267	52.6984	58.7514	48.8821	61.499	58.272	65.3371	58.0403	61.6885	56.4677	50.9434	48.8141	60.3272
	22:00:00	55.1096	64.5345	54.5423	59.7299	49.1817	48.6798	49.4521	48.0854	54.3794	65.1898	61.4481	65.6184	55.8523	52.1847	51.0006	61.1765
	23:00:00	56.5261	56.6943	53.5564	56.6844	46.4637	52.984	54.0889	44.9556	64.4714	59.8948	59.393	56.5529	56.3815	58.7611	49.6575	55.1931
	1900-01-01	52.5206	60.2209	59.5436	58.0627	54.6328	53.8843	57.1122	56.4585	60.0809	70.1672	52.3832	64.1419	55.0992	52.3642	47.6287	54.9514
	1900-01-01 01:00:00	49.7837	58.2171	49.4834	48.3825	54.7019	50.1469	50.8733	53.7672	57.4397	63.9834	55.2212	46.9223	57.8266	52.0528	51.0851	48.9752
	1900-01-01 02:00:00	53.0749	56.389	45.2531	53.9362	51.8167	54.0023	48.3124	51.3191	60.2442	60.0507	51.376	54.9101	49.5611	54.201	45.6177	65.2849
	1900-01-01 03:00:00	54.7055	50.3381	49.936	54.7558	42.7602	51.314	47.183	63.8652	57.7536	60.9102	53.5913	55.923	51.9411	54.394	48.5248	61.4055
	1900-01-01 04:00:00	52.9829	56.7502	45.4237	57.2728	52.0048	49.349	50.23	44.2991	55.8406	60.4304	48.8322	58.5463	53.9798	46.5532	46.0566	52.3454
	1900-01-01 05:00:00	55.4264	63.7045	49.321	62.4479	53.4236	53.4559	50.1413	56.1475	55.6474	63.257	58.5058	59.6964	60.8362	48.9743	49.2124	58.8754
	1900-01-01 06:00:00	45.5042	51.306	43.7288	56.6645	50.7133	53.7521	49.8083	63.6162	61.0518	57.4888	49.5332	54.9687	50.1671	53.4251	46.7106	59.8274
	1900-01-01 07:00:00	51.9982	54.1705	38.8603	55.1793	59.001	55.0612	40.0835	58.8889	51.6451	61.5197	58.1641	51.9758	55.562	45.8791	51.0197	60.7879
Day 2	1900-01-01 08:00:00	47.4482	43.3744	41.289	38.3447	49.9515	44.4395	40.8817	42.8625	51.0508	55.1442	40.5926	44.6707	49.0595	44.114	46.2522	52.8053
	1900-01-01 09:00:00	36.1888	42.2465	40.2693	42.6944	35.3079	44.2658	41.4129	38.9551	40.8635	48.3	45.4088	45.6752	44.3223	46.1339	50.3811	57.0059
	1900-01-01 10:00:00	44.2944	48.5858	42.9387	42.6226	52.2815	44.9495	44.9018	42.9071	48.0628	41.8216	42.2694	49.4495	56.2099	40.4328	47.0118	49.1964
	1900-01-01 11:00:00	44.4778	37.6085	48.527	44.923	45.4751	35.9699	38.6099	48.8092	52.3022	52.2648	42.3924	58.1914	51.0193	39.317	51.3752	58.3691
	1900-01-01 12:00:00	43.1754	40.3653	40.8264	39.9339	55.7158	38.6842	34.6888	39.5849	46.1605	41.6855	61.3826	47.1748	50.6828	43.5899	45.4689	52.9085
	1900-01-01 13:00:00	40.1355	41.8645	41.8971	40.8302	42.7448	59.8492	37.5107	50.0711	46.6846	48.7543	45.7352	40.8648	49.929	47.7856	45.2982	59.1291
	1900-01-01 14:00:00	42.8157	38.9073	41.5874	38.4994	46.1636	46.8331	37.3748	46.0099	50.4959	43.3549	43.736	41.8751	51.3319	48.0404	41.9684	47.7898
	1900-01-01 15:00:00	41.0172	46.6108	39.9008	37.7856	53.6165	43.1109	34.0884	46.036	44.0355	51.9364	44.5578	39.2697	47.7548	47.1115	55.5842	49.1155
	1900-01-01 16:00:00	45.3827	37.7677	39.436	41.4393	44.0869	39.6201	39.8897	43.3414	49.531	42.5871	42.543	47.2598	52.5323	45.3883	50.2539	45.6206
	1900-01-01 17:00:00	46.058	43.4879	42.9084	39.192	48.2609	45.5063	36.3561	42.7934	52.7471	43.2709	45.1257	46.4674	52.9838	45.0174	43.8052	54.3436
	1900-01-01 18:00:00	51.1792	45.068	43.4013	45.5839	50.2472	45.7734	49.0194	42.6353	52.1432	50.6155	49.2127	44.5974	58.6559	46.3198	51.1773	46.2901
	1900-01-01 19:00:00	59.137	55.9191	50.0809	56.8417	63.2163	57.9956	48.7704	54.7899	63.8948	57.1338	63.3028	56.9477	60.4876	51.9232	54.0691	58.0517
	1900-01-01 20:00:00	56.7819	57.1496	51.748	65.4546	70.5154	55.9174	54.7256	51.0781	65.765	70.1105	62.8681	57.7434	69.7222	57.3019	52.602	61.5241
	1900-01-01 21:00:00	59.7706	58.3471	53.0087	52.8795	65.3992	65.7193	55.4802	62.6038	65.4014	67.5272	63.5701	59.2164	64.642	57.6334	47.7736	62.0197
	1900-01-01 22:00:00	61.4985	61.3345	54.7515	62.9188	59.8334	65.9695	51.7432	55.3613	67.8756	61.7584	65.8956	61.5009	61.9664	68.9187	60.28	61.633
	1900-01-01 23:00:00	60.4965	55.8583	57.5671	51.1872	58.4125	67.6805	48.9807	57.9457	64.548	72.4457	59.8186	57.6901	61.2298	58.6631	49.953	59.8988
	1900-01-02	56.2991	59.1922	50.8641	54.05	59.0455	55.4171	55.7687	51.289	70.5649	64.9301	62.2675	55.7997	67.8141	53.9567	47.4891	62.331
	1900-01-02 01:00:00	56.9704	52.9582	48.6407	49.0356	53.6877	50.6947	46.0239	52.9951	58.389	61.8408	54.6227	54.064	62.3254	54.9733	66.2283	62.1368
	1900-01-02 02:00:00	51.6038	52.16	50.2582	54.695	48.0658	60.7341	39.0164	61.3176	58.4829	60.2212	55.5482	51.7632	54.7347	51.124	53.0562	50.299
	1900-01-02 03:00:00	51.19	54.3887	44.8931	49.1243	61.0871	50.6377	44.9791	56.3454	57.7564	60.0006	55.026	55.0063	59.8971	53.0095	52.5716	54.517
	1900-01-02 04:00:00	48.8715	53.8089	49.6106	53.7192	60.1925	52.6048	51.7472	58.8349	64.4348	63.1979	53.4069	56.3374	65.2021	59.639	49.691	57.9824
	1900-01-02 05:00:00	53.114	50.864	48.0098	53.2048	58.2776	61.9057	48.9336	61.6763	61.3403	62.796	52.4532	54.7686	65.6239	53.8966	53.2117	67.361
	1900-01-02 06:00:00	48.7935	42.2099	39.8464	47.762	50.7431	50.3387	42.451	58.1292	58.1373	59.5209	44.1336	56.8995	60.5504	52.5437	54.6418	57.5342
	1900-01-02 07:00:00	45.2347	51.0124	44.4232	53.201	63.0948	63.0919	45.3187	54.7735	56.2131	61.9665	45.7863	47.3502	59.5252	52.1104	52.78	63.8476
Day 3	1900-01-02 08:00:00	44.0682	40.795	37.5753	39.344	44.8531	47.0943	43.1468	47.1477	50.8123	45.44	46.0364	47.7882	56.5076	49.3506	49.1149	54.1321
	1900-01-02 09:00:00	41.8225	44.4104	39.4506	37.3895	43.876	43.9886	38.7722	51.9408	50.6787	50.4986	40.936	42.7942	50.1296	56.7539	45.7262	54.0067
	1900-01-02 10:00:00	48.4749	41.6481	40.8157	42.1842	52.9203	57.3432	38.5608	59.0596	54.1581	52.1654	51.3965	49.295	54.1244	45.7326	48.4765	47.8593
	1900-01-02 11:00:00	41.7664	47.3056	41.9516	43.9582	45.0186	47.2899	34.6018	50.6587	49.227	61.2176	40.432	40.7978	46.4373	45.764	41.5682	53.1399
	1900-01-02 12:00:00	42.8041	39.2151	43.9751	40.5417	46.1456	42.147	51.1495	41.9198	46.3528	48.5114	56.2454	45.1846	54.2341	46.4712	46.876	52.4052
	1900-01-02 13:00:00	44.2042	40.942	40.8708	41.6586	44.2006	44.9836	38.1824	57.6286	49.6926	46.7054	43.5197	48.4531	46.1661	44.5828	48.4023	59.1339
	1900-01-02 14:00:00	40.2457	46.8888	42.1365	39.7184	41.8632	42.6865	38.2216	45.0814	45.3981	52.2179	46.3874	48.3902	49.5581	44.9174	44.2665	52.4497
	1900-01-02 15:00:00	46.064	40.5235	41.652	37.7859	43.4007	42.5716	41.8622	43.6857	47.3336	54.1885	38.7295	42.0204	44.0885	41.9579	46.535	51.0632
	1900-01-02 16:00:00	44.8228	43.434	43.8183	40.4268	44.9631	38.9484	38.3464	53.0189	45.7632	47.8407	43.6989	50.5252	50.0715	44.2397	45.151	59.5014
	1900-01-02 17:00:00	42.2299	40.4112	39.3114	40.8732	52.9322	50.0519	43.2613	40.949	49.8058	51.827	41.4519	46.9326	49.1139	42.3419	46.5001	50.8284
	1900-01-02 18:00:00	55.008	47.4793	43.2286	45.2955	42.5746	49.0374	44.6645	58.4802	48.9011	52.2585	45.4275	50.8006	51.248	45.0945	44.3056	53.7067
	1900-01-02 19:00:00	67.6971	55.5605	53.3522	59.9286	58.861	53.9553	57.737	58.6831	62.2502	63.0762	59.7815	57.351	64.872	53.4118	56.7139	63.3486
	1900-01-02 20:00:00	63.0529	62.3399	56.6868	61.2425	73.4679	58.0945	61.4171	65.2471	65.2327	79.3452	64.0962	65.4195	70.1223	71.6207	72.697	65.9131
	1900-01-02 21:00:00	61.6176	64.1634	53.844	51.2585	60.2615	69.2267	60.5057	68.2912	71.4433	66.9541	64.2391	57.9677	63.384	67.1093	64.9219	68.739
	1900-01-02 22:00:00	63.2369	62.2758	52.8226	52.1107	57.8366	67.6559	61.623	61.0839	65.5054	65.2496	61.2985	63.6019	64.3483	72.5082	50.0522	66.9646
	1900-01-02 23:00:00	59.4843	60.4418	57.228	60.6071	58.2907	61.696	55.7538	61.7597	68.0491	64.7099	57.6287	57.0767	53.3759	63.7973	54.2143	65.1114
	1900-01-03	56.5843	55.6771	48.9554	49.5906	62.5046	64.0855	58.4042	60.3772	62.3727	68.5926	64.1133	65.0532	70.2053	59.2694	53.2179	56.4047
	1900-01-03 01:00:00	48.4451	48.1764	45.9039	52.0638	53.0925	60.2251	57.0784	72.6482	55.7965	65.9126	53.4698	54.0744	56.705	64.9228	61.71	61.6165
	1900-01-03 02:00:00	49.3543	54.2097	55.2984	50.6446	50.6359	55.7836	53.4977	54.8216	59.0244	61.8499	56.2427	57.851	54.5221	64.5849	46.2969	58.8173
	1900-01-03 03:00:00	47.4765	42.4775	47.1633	49.6478	56.1122	60.124	57.9296	53.8335	60.2241	62.7111	56.4846	56.7819	53.9331	54.8165	46.4963	57.8693
	1900-01-03 04:00:00	54.2021	52.7135	53.5869	56.2754	56.5128	62.6899	59.1076	70.1264	60.7369	63.4694	58.6523	59.1614	60.7041	53.4279	55.2466	68.941
	1900-01-03 05:00:00	51.1181	51.0615	46.0382	51.3717	58.5146	68.0634	53.0697	58.4194	63.1908	68.012	56.355	57.9068	60.6084	52.5319	53.8429	69.9419
	1900-01-03 06:00:00	47.9453	44.045	50.6717	52.0324	55.0519	62.667	49.641	71.7837	55.395	56.7134	51.1893	50.4153	62.6538	53.9204	54.1449	64.1297
	1900-01-03 07:00:00	49.3669	42.6715	43.1793	57.2957	62.7523	52.1692	52.9572	63.1584	53.904	59.2071	58.9903	53.0038	53.53	64.7644	51.7939	56.7974
Day 4	1900-01-03 08:00:00	39.9625	53.3221	46.7052	38.6361	46.9176	60.47	46.5619	45.4701	52.1351	57.7528	41.5774	49.298	57.6185	45.8695	49.5335	60.7498
	1900-01-03 09:00:00	42.025	37.4658	40.0684	46.534	47.4517	51.4119	38.2911	52.4182	49.6903	47.5218	49.9987	48.0546	48.5374	47.8654	44.5861	52.3924
	1900-01-03 10:00:00	45.3368	57.674	40.3049	43.8947	55.7223	45.3012	42.7837	39.3453	50.8067	50.514	39.6013	44.7777	48.5444	44.9057	49.7054	57.2171
	1900-01-03 11:00:00	63.0008	36.0653	45.8017	43.2814	59.2444	46.8095	44.7946	62.1506	75.6153	46.1183	45.4901	55.1826	66.9673	43.0696	49.846	51.9768
	1900-01-03 12:00:00	48.7341	64.1018	45.1316	41.8867	53.3278	50.4652	47.3017	48.2887	62.5479	56.5428	52.8881	48.7638	63.1556	62.8742	48.2922	61.3565
	1900-01-03 13:00:00	50.1884	51.3619	41.2095	41.7875	50.2951	48.6211	41.0881	45.0535	59.011	47.1273	47.7235	44.9397	57.2842	53.1762	48.4603	50.4006
	1900-01-03 14:00:00	43.5107	51.4329	43.0404	37.1936	57.6751	47.3558	37.6622	50.8138	52.0656	59.8455	44.2946	50.0793	66.8776	54.1939	48.1465	58.4205
	1900-01-03 15:00:00	49.4762	50.8064	43.7579	41.3151	46.3341	53.4896	51.5446	40.1748	52.9532	45.263	45.5768	43.6327	63.5208	45.6594	42.6476	47.2518
	1900-01-03 16:00:00	48.6944	49.6711	42.2745	40.8869	53.6423	48.9775	37.6147	54.3704	52.0246	50.5783	45.1278	49.5474	64.86	52.7025	45.7657	52.7946
	1900-01-03 17:00:00	48.0316	46.6798	43.5804	41.0332	50.8054	49.4211	39.2597	38.9219	55.0982	47.9741	47.358	50.9514	71.6654	46.4399	45.4197	67.1127
	1900-01-03 18:00:00	54.7554	51.5952	43.8646	48.4993	58.764	53.2404	46.9209	51.7054	56.8129	54.9072	46.4748	48.0195	64.0848	47.1348	47.2958	54.6005
	1900-01-03 19:00:00	63.7362	67.458	53.5308	63.3947	63.9455	54.4163	57.0673	62.8832	74.7914	67.0083	59.6832	59.2297	77.3094	58.2832	61.9988	63.9875
	1900-01-03 20:00:00	66.2908	71.5552	50.5661	60.8067	73.319	65.943	60.8722	69.0268	70.8234	78.3821	70.9198	64.1892	75.569	67.9247	62.8141	67.5796
	1900-01-03 21:00:00	60.3444	65.5833	55.1469	57.446	66.8461	52.5489	67.4543	57.7905	68.9123	74.1823	61.6668	63.866	76.6435	71.9036	66.1955	67.4808
	1900-01-03 22:00:00	55.7883	66.3725	56.5417	52.2221	67.7992	68.4095	63.8069	74.5274	78.0696	67.9096	64.2989	59.3204	66.2607	77.8841	54.8917	67.8009
	1900-01-03 23:00:00	57.2986	56.9497	55.3754	51.7137	73.4172	65.4483	66.855	74.365	72.9141	74.3637	60.6907	56.6151	66.4377	59.928	55.5212	62.4275
	1900-01-04	48.723	56.4609	56.3084	60.0091	71.2123	63.2018	70.7935	65.2902	69.7106	70.3029	64.1007	63.5976	63.5673	65.4346	58.0979	54.2374
	1900-01-04 01:00:00	53.5527	53.4723	47.0837	47.6514	63.6985	55.1026	65.1117	47.7276	70.829	68.8174	53.6094	51.6453	71.6389	58.8004	65.8609	64.1887
	1900-01-04 02:00:00	51.3226	54.1539	51.5948	49.7987	60.2899	64.409	61.1817	52.1255	65.8654	66.4682	56.3808	51.5127	65.4238	57.8299	48.402	53.0891
	1900-01-04 03:00:00	46.7471	50.7901	47.4263	53.2366	58.4687	57.5676	66.4231	76.5112	65.2537	66.8116	57.8373	56.7883	71.6892	64.6218	57.5399	63.8695
	1900-01-04 04:00:00	53.2085	54.0695	52.4104	53.3365	59.7237	60.2071	63.6843	70.104	67.8866	63.9475	55.6062	60.747	70.6447	56.3925	54.1465	66.0671
	1900-01-04 05:00:00	48.5244	57.2358	53.597	60.0477	57.3711	70.7979	53.757	72.0299	70.0549	66.78	60.4459	64.1226	73.1198	59.4864	61.7619	60.0396
	1900-01-04 06:00:00	51.4551	51.5512	35.992	51.1682	56.0614	59.2246	46.3595	67.2951	65.3357	54.2576	49.5448	55.0607	62.0719	54.8986	58.575	47.4441
	1900-01-04 07:00:00	44.4358	52.728	46.1784	56.7763	58.5127	57.9511	43.5884	51.0299	70.3369	59.821	58.0757	56.6899	63.3674	49.588	51.0035	66.4617
Day 5	1900-01-04 08:00:00	47.9085	43.2212	42.9925	44.099	47.646	44.9096	44.2037	49.3591	62.1235	57.098	44.0935	47.0579	61.2694	48.6835	51.322	50.8513
	1900-01-04 09:00:00	44.5661	48.5655	42.7136	43.8315	47.9574	49.6329	46.1936	65.9773	60.0924	53.3046	49.9531	49.6706	59.2966	48.6156	46.8322	56.6852
	1900-01-04 10:00:00	43.2509	50.176	41.1852	43.1533	49.8481	47.2005	36.2182	43.8682	58.9645	61.2276	59.5317	51.7798	56.0456	53.1822	50.0442	49.7121
	1900-01-04 11:00:00	47.7746	42.9611	51.2232	45.6022	44.0527	53.8274	46.3837	62.3778	60.7364	58.9701	48.7335	50.8149	57.1722	45.8056	54.4273	55.8363
	1900-01-04 12:00:00	41.8703	49.169	43.4037	38.4552	41.8981	54.9671	37.573	58.162	59.3171	58.0723	44.6736	60.4154	53.3527	50.3565	48.7659	72.9278
	1900-01-04 13:00:00	43.3251	43.9961	47.7528	42.108	49.8971	60.0081	40.3917	46.9414	52.5908	56.727	51.6724	49.062	57.6457	66.0986	45.8484	55.7902
	1900-01-04 14:00:00	51.9715	51.0624	41.7875	36.148	42.1822	47.4417	43.8075	41.8933	53.9556	49.9919	43.4755	45.4929	58.7015	59.2451	51.4699	65.0245
	1900-01-04 15:00:00	37.5177	40.3635	43.3202	39.0447	46.1773	52.775	45.9261	49.8273	58.4646	54.0073	44.4163	48.8175	57.5198	56.5754	51.7698	62.7784
	1900-01-04 16:00:00	49.7883	44.9478	42.0788	45.2244	42.8903	45.1235	37.3798	41.5741	52.0899	47.6182	48.9699	44.4315	54.2113	59.8624	44.7602	56.9221
	1900-01-04 17:00:00	41.3149	48.7354	40.6691	43.1432	51.4635	58.3703	48.8768	43.6416	59.1827	53.3506	45.4782	47.8438	55.6807	49.4499	52.8807	62.1139
	1900-01-04 18:00:00	53.7381	47.8685	48.8737	44.4949	47.3922	49.2659	45.3053	48.7546	63.6683	59.2897	48.5264	48.4652	57.637	50.956	51.5728	62.0761
	1900-01-04 19:00:00	64.7906	66.7751	53.5992	64.6771	64.0452	63.6906	58.968	56.243	74.1287	69.7819	61.4573	61.0623	71.25	61.0554	64.553	67.359
	1900-01-04 20:00:00	71.3646	63.6995	51.3737	62.8561	66.7924	67.7451	64.142	74.5793	72.7071	71.4214	66.0231	70.8454	77.7621	73.6917	63.8767	75.3732
	1900-01-04 21:00:00	56.819	66.6736	52.8065	52.8187	65.464	70.767	58.9547	56.2495	76.9114	76.3968	67.8392	74.2751	69.3899	73.3705	67.5855	63.7763
	1900-01-04 22:00:00	62.1504	56.3281	56.8096	53.0023	70.8744	70.2292	60.6681	77.7796	69.9324	73.288	66.3368	74.2083	73.3782	67.9919	73.4675	70.4717
	1900-01-04 23:00:00	55.2859	59.7387	58.0003	57.1969	63.3701	65.2918	61.4685	61.3373	79.1245	71.1394	56.0334	73.3516	70.6969	70.9317	58.3024	65.5844
	1900-01-05	50.9277	55.9727	52.7312	50.3191	64.5726	67.2826	59.493	68.0187	66.5193	71.8418	65.561	66.1096	65.5958	64.1214	60.5853	72.101
	1900-01-05 01:00:00	61.5415	55.6359	52.8298	52.7768	57.397	57.6085	53.5118	52.6406	69.1517	66.9293	55.1075	55.0331	65.4183	65.1328	62.4029	69.4334
	1900-01-05 02:00:00	47.4023	52.1717	51.0569	48.1989	52.8514	54.9589	58.5408	63.2055	68.5963	62.6031	58.8994	58.2468	72.9069	62.2447	48.9637	61.4831
	1900-01-05 03:00:00	50.8328	56.4428	52.7518	52.567	54.8185	57.9642	56.3845	51.545	69.8301	74.4537	55.4772	59.2537	70.3095	69.7728	51.1753	65.6647
	1900-01-05 04:00:00	49.6407	54.6551	51.6079	52.161	58.268	65.2529	62.5633	65.1909	67.76	64.6427	56.328	62.7549	76.9746	59.3215	55.6062	65.5239
	1900-01-05 05:00:00	57.7813	54.9784	46.2972	56.4877	55.3184	62.8477	51.841	68.6722	69.6923	71.8506	59.8597	66.3387	69.6909	57.6611	65.7766	70.3
	1900-01-05 06:00:00	43.2374	50.8218	47.9891	48.6418	58.1254	67.8748	51.766	59.8517	71.2529	56.7687	52.103	57.6754	67.1402	55.9948	61.5789	63.2164
	1900-01-05 07:00:00	49.3289	48.6084	45.33	54.518	47.4444	53.4976	47.5009	54.9395	62.8255	56.8323	44.4331	54.9592	63.9721	50.0893	50.217	58.6332
Day 6	1900-01-05 08:00:00	44.2835	42.3151	44.4449	39.4056	47.1672	49.5942	47.6837	49.7867	62.7364	67.0737	49.9799	49.676	69.7666	51.7232	58.5713	70.0055
	1900-01-05 09:00:00	47.5896	44.9705	41.426	43.0382	49.1668	49.1575	44.0044	43.6469	63.4236	51.2423	44.0943	50.5258	59.218	52.4943	48.9468	62.9023
	1900-01-05 10:00:00	41.3961	51.4855	43.9469	42.3221	60.0636	50.5758	43.823	40.6571	55.8991	52.2256	47.3543	47.9294	57.0307	47.5037	52.1662	58.2089
	1900-01-05 11:00:00	51.2066	46.5335	44.4831	37.6143	51.0179	54.6313	40.4268	55.571	77.2306	63.6477	57.4085	52.8232	68.2379	54.412	46.874	52.5606
	1900-01-05 12:00:00	43.531	42.1037	41.5644	48.2258	45.9145	46.8053	39.039	51.0969	66.6223	50.7465	41.0491	43.8703	60.7695	73.4778	51.3279	54.9065
	1900-01-05 13:00:00	45.289	41.2486	42.6483	36.8171	42.927	52.7594	47.59	39.9054	59.2824	56.618	45.8757	45.7923	70.5846	57.8074	46.3875	57.7191
	1900-01-05 14:00:00	54.2965	52.0548	45.4134	38.0663	48.4646	48.0763	44.1043	45.5433	55.8858	54.7087	46.1706	43.9453	58.5017	64.7176	47.0595	49.3995
	1900-01-05 15:00:00	40.7411	41.0857	50.1924	40.3298	46.8014	46.213	42.6931	47.9161	57.0943	53.1646	57.1342	53.4065	62.0844	50.1692	59.0101	56.7988
	1900-01-05 16:00:00	48.9078	48.1392	40.0348	42.2277	40.5078	60.7832	46.7083	38.3049	64.0236	54.9455	50.1326	43.5121	64.3147	58.5982	54.4231	53.6785
	1900-01-05 17:00:00	42.8334	45.7476	42.2333	39.7846	43.9208	50.7354	44.0061	49.4537	60.006	55.6045	45.5741	43.6868	57.9134	52.1616	54.2992	53.9294
	1900-01-05 18:00:00	51.5425	50.3376	44.6186	45.4343	47.7648	47.7647	46.2876	42.2759	64.5183	56.6208	49.911	51.0972	65.3367	49.9987	48.598	51.4986
	1900-01-05 19:00:00	67.0844	64.6629	53.4286	61.9159	62.9344	63.3483	54.8688	58.7923	70.6851	71.5854	62.491	56.6068	74.9911	72.9696	61.9505	65.5744
	1900-01-05 20:00:00	70.2589	60.3763	53.6344	65.828	65.3893	63.4231	65.0142	65.0149	73.498	77.9606	76.2182	63.9956	81.1895	75.7234	68.5436	72.2269
	1900-01-05 21:00:00	58.1499	57.4918	53.2295	50.9588	61.6234	64.7583	63.0727	54.852	77.3755	73.5222	74.8991	60.7979	74.4617	76.4062	63.5821	76.1836
	1900-01-05 22:00:00	64.366	64.4635	51.3977	52.7739	73.2434	65.5215	66.7182	63.3252	73.7742	74.3315	60.3903	66.5097	74.1484	66.4326	66.5856	68.7927
	1900-01-05 23:00:00	48.8855	58.1331	62.9765	53.7302	69.0952	63.3953	66.9673	70.5185	76.8882	75.2134	63.4267	59.048	81.8632	71.9034	61.812	63.9297
	1900-01-06	58.7272	51.9942	54.9336	50.8813	48.9231	57.9745	63.9306	54.1413	73.3944	67.9119	62.8158	59.5916	73.8321	70.3436	60.3659	68.7021
	1900-01-06 01:00:00	50.2589	55.9769	48.6731	50.6983	65.3431	57.09	63.976	65.2977	67.5362	76.4952	57.0678	58.0736	73.4843	62.3545	65.2694	62.9625
	1900-01-06 02:00:00	55.9812	59.8294	48.8092	50.7509	56.9766	53.6835	59.5664	49.5395	72.2189	66.9238	50.0451	58.9357	66.6545	64.3263	58.1433	62.3208
	1900-01-06 03:00:00	45.7828	50.9896	49.2427	51.2771	52.6453	51.4975	54.1704	49.7165	67.1837	63.8876	50.3593	59.5519	71.9992	62.2949	53.4281	64.1086
	1900-01-06 04:00:00	49.57	57.4727	53.7123	53.2437	57.33	61.1266	62.1016	56.5881	69.6466	67.482	56.6015	62.9379	73.1607	60.2815	58.7531	70.2581
	1900-01-06 05:00:00	56.6937	63.5853	51.7308	56.5761	62.933	55.1678	58.5642	59.2883	76.595	72.4635	59.6093	66.6705	80.3906	58.3714	61.2264	64.8369
	1900-01-06 06:00:00	47.0828	46.0308	41.3628	47.4749	63.1086	67.1434	63.2643	52.9121	69.7128	61.9243	53.6119	56.012	79.5574	50.3376	55.7575	69.9766
	1900-01-06 07:00:00	44.3411	45.7335	46.1665	57.2078	52.1329	54.4986	45.7673	52.573	81.3994	58.8575	48.2096	55.4412	66.1626	68.761	52.5614	61.6969
Day 7	1900-01-06 08:00:00	47.655	53.8521	40.9722	39.5739	46.4105	45.4362	43.9566	46.0002	63.8422	52.8344	48.8526	50.5962	67.281	48.9959	48.6265	56.7164
	1900-01-06 09:00:00	43.455	45.1032	41.0358	37.9981	46.7188	49.8447	41.2394	46.0089	69.0866	61.246	47.7702	47.5045	67.6748	49.8253	50.7563	55.4152
	1900-01-06 10:00:00	43.7409	56.0935	42.5396	62.199	47.4519	50.7863	41.5292	62.104	59.0031	50.5068	49.6145	57.6903	64.4703	55.883	47.6811	67.4685
	1900-01-06 11:00:00	51.003	40.9884	45.5838	50.6539	57.483	41.473	41.2086	53.8277	66.4553	58.9376	49.6381	55.5077	64.1557	51.5045	58.1675	70.4264
	1900-01-06 12:00:00	56.7201	66.7288	45.6807	46.7421	56.2262	61.3871	44.6268	49.1693	63.3591	58.6492	55.0586	53.3466	75.2922	71.0115	52.4607	63.7415
	1900-01-06 13:00:00	45.8006	66.4606	49.7467	42.0701	58.1112	45.5317	44.9631	48.0607	67.3516	58.685	47.149	55.1037	63.2664	69.2048	49.3674	65.8573
	1900-01-06 14:00:00	63.6527	52.1456	41.0411	40.4741	55.5971	42.9288	44.8178	51.3809	62.7268	54.5696	60.3401	50.0927	62.903	62.3608	49.1775	62.0234
	1900-01-06 15:00:00	45.9363	52.0747	44.7823	43.0373	53.7097	42.9457	41.1932	59.9325	61.3584	56.5654	43.1887	53.8401	61.6101	60.8352	50.355	64.1913
	1900-01-06 16:00:00	52.7911	50.7734	41.0504	45.5915	53.2439	44.7266	48.3369	50.3788	61.5503	52.1833	46.5775	45.417	62.8322	56.6852	48.1689	68.4062
	1900-01-06 17:00:00	58.2241	52.5171	40.8632	43.6687	45.5898	47.6322	53.3704	52.0341	62.9594	60.7594	48.1597	50.7933	61.6472	61.9579	55.5731	63.9265
	1900-01-06 18:00:00	53.9513	55.6597	46.2732	50.9006	50.3004	49.0735	42.4203	54.4318	62.5721	56.55	47.6706	48.7807	64.3939	59.6989	50.3435	66.669
	1900-01-06 19:00:00	73.2114	69.8683	52.5495	67.1829	62.8687	62.432	51.1014	66.3878	75.9631	76.2368	61.5979	59.5607	71.1598	68.6	67.7973	67.7414
	1900-01-06 20:00:00	80.3046	66.2507	51.2175	71.9613	70.119	71.9031	56.3483	78.4677	85.0186	81.8265	71.2461	65.1665	82.4687	78.2506	70.3465	73.2279
	1900-01-06 21:00:00	69.8224	73.1896	53.095	53.4233	66.5973	64.1287	56.8901	61.9242	77.87	79.1726	75.8886	61.6762	67.4012	77.3791	66.6481	69.9978
	1900-01-06 22:00:00	62.4463	59.551	60.101	58.0408	72.7695	72.6006	53.7998	66.3313	76.8803	72.7506	59.2623	64.818	67.3118	69.8524	78.0724	69.8175
	1900-01-06 23:00:00	64.649	66.3546	54.2678	55.4608	59.0956	69.1514	67.7238	74.2908	79.9144	81.0806	65.5049	65.4015	71.1336	72.3493	65.1063	69.7919
	1900-01-07	56.2388	56.6377	52.225	59.1065	59.5974	59.4314	49.4105	69.4604	85.0772	69.761	63.1941	62.4006	71.0145	67.1135	64.5111	78.0426
	1900-01-07 01:00:00	66.0745	58.4464	48.93	55.8203	67.3882	53.55	49.6979	65.4522	81.402	74.7346	61.2685	71.2806	67.3517	65.0129	59.4337	68.2774
	1900-01-07 02:00:00	58.0677	60.3925	48.6548	52.8766	57.7569	49.9354	48.891	56.3489	76.4971	69.0478	61.4704	61.8086	62.6826	63.9206	60.4173	66.4556
	1900-01-07 03:00:00	61.6729	57.4738	54.2738	56.0002	55.2213	56.8809	48.3332	59.738	76.1084	70.0666	61.5714	62.1183	70.5966	63.7635	60.881	71.6048
	1900-01-07 04:00:00	59.0643	57.5637	52.7227	53.7761	66.6166	67.0771	55.9283	65.7215	75.0046	68.3051	59.2743	63.7922	75.4406	65.6473	59.7237	70.142
	1900-01-07 05:00:00	58.5345	64.3232	50.1297	53.1892	61.4206	66.4884	54.9579	61.8969	78.6913	74.2301	64.2073	67.2792	73.2309	67.8587	57.4338	82.7118
	1900-01-07 06:00:00	52.9156	45.6256	44.4705	46.7194	47.5534	55.4306	50.7482	59.1995	72.8215	63.4779	62.57	58.3483	64.3473	69.9393	57.0583	71.7064

## Sheet: S1E-F
(E and F) RER for WT (E) and IL-6 KO (F) mice subjected (or not) to bilateral cast immobilization for 7 days (n = 4 per group).
		WT								KO									Light phase							Dark phase
		Control 1	Control 2	Control 3	Control 4	Imm 1	Imm 2	Imm 3	Imm 4	Control 1	Control 2	Control 3	Control 4	Imm 1	Imm 2	Imm 3	Imm 4				WT		Homo					WT		Homo
Day 1	12:00:00	0.857271	0.808534	0.849826	0.824371	0.854896	0.830881	0.907803	0.78019	0.914458	0.858341	0.843578	0.872587	0.841746	0.788425	0.85584	0.81462				Control	Imm	Control	Imm				Control	Imm	Control	Imm
	13:00:00	0.905168	0.870778	0.930438	0.828568	0.881834	0.856668	0.87497	0.777523	0.93464	0.891301	0.873324	0.90499	0.81917	0.811712	0.831358	0.826756		Day 1	12:00:00	0.835001	0.843443	0.872241	0.825158		Day 1	20:00:00	0.907176	0.879745	0.906695	0.844548
	14:00:00	0.920856	0.912496	0.944252	0.854142	0.87653	0.895111	0.892026	0.798405	0.921679	0.90349	0.865945	0.893155	0.834783	0.839265	0.853764	0.838851			13:00:00	0.883738	0.847749	0.901064	0.822249			21:00:00	0.903095	0.89126	0.918387	0.870523
	15:00:00	0.912239	0.901398	0.964406	0.850795	0.854488	0.922721	0.88761	0.803587	0.90676	0.893409	0.880308	0.90601	0.860534	0.828901	0.833349	0.804855			14:00:00	0.907937	0.865518	0.896067	0.841666			22:00:00	0.909806	0.898671	0.925569	0.882419
	16:00:00	0.914778	0.917308	0.967749	0.814896	0.831348	0.921855	0.899072	0.80029	0.903415	0.90141	0.895548	0.886717	0.831868	0.812125	0.845575	0.836913			15:00:00	0.90721	0.867101	0.896622	0.83191			23:00:00	0.919253	0.894927	0.931129	0.896733
	17:00:00	0.91402	0.905481	0.970074	0.819444	0.845699	0.916133	0.896919	0.790147	0.919894	0.895878	0.900693	0.896277	0.836754	0.800642	0.825189	0.838096			16:00:00	0.903683	0.863141	0.896773	0.83162			1900-01-01	0.917265	0.901201	0.931369	0.892018
	18:00:00	0.911907	0.912921	0.962844	0.841868	0.871476	0.877788	0.901176	0.81827	0.912631	0.90232	0.90263	0.902682	0.823296	0.785746	0.816803	0.860961			17:00:00	0.902255	0.862224	0.903186	0.82517			1900-01-01 01:00:00	0.92765	0.910376	0.926874	0.885049
	19:00:00	0.887831	0.921969	0.951759	0.875146	0.849826	0.878742	0.914369	0.82225	0.918568	0.906563	0.888173	0.884666	0.804387	0.836635	0.826198	0.831037			18:00:00	0.907385	0.867177	0.905065	0.821702			1900-01-01 02:00:00	0.927902	0.892978	0.926372	0.86674
	20:00:00	0.88079	0.92393	0.940197	0.883784	0.871533	0.895633	0.889422	0.862392	0.921462	0.908876	0.880431	0.916013	0.831332	0.846141	0.838171	0.862549			19:00:00	0.909176	0.866297	0.899492	0.824564			1900-01-01 03:00:00	0.923683	0.883693	0.909273	0.863729
	21:00:00	0.884771	0.91101	0.939681	0.876918	0.903029	0.921097	0.868055	0.87286	0.926213	0.904754	0.924385	0.918195	0.869892	0.85739	0.869228	0.885581		Day 2	1900-01-01 08:00:00	0.903282	0.856578	0.901376	0.86071			1900-01-01 04:00:00	0.914666	0.895821	0.904522	0.856059
	22:00:00	0.882605	0.922595	0.946051	0.887974	0.881369	0.924171	0.91095	0.878193	0.924701	0.905312	0.943272	0.928993	0.863044	0.899285	0.871934	0.895413			1900-01-01 09:00:00	0.882706	0.844748	0.862973	0.83372			1900-01-01 05:00:00	0.90267	0.878559	0.883255	0.840899
	23:00:00	0.904151	0.925754	0.951697	0.895412	0.864645	0.911072	0.928261	0.875731	0.933151	0.917013	0.946604	0.927746	0.871727	0.895456	0.906355	0.913393			1900-01-01 10:00:00	0.931684	0.891824	0.89936	0.867181			1900-01-01 06:00:00	0.905499	0.899736	0.876617	0.867094
	1900-01-01	0.901682	0.927346	0.958713	0.88132	0.898981	0.920373	0.933232	0.852216	0.923137	0.925205	0.933952	0.943181	0.865613	0.891652	0.905555	0.905252			1900-01-01 11:00:00	0.872706	0.850431	0.863846	0.845194			1900-01-01 07:00:00	0.909745	0.89192	0.884685	0.866026
	1900-01-01 01:00:00	0.928643	0.921202	0.969692	0.891062	0.898849	0.926898	0.934533	0.881225	0.930217	0.923029	0.923693	0.930556	0.836427	0.895591	0.90365	0.904527			1900-01-01 12:00:00	0.873094	0.838249	0.84863	0.856927		Day 2	20:00:00	0.898248	0.882917	0.89692	0.887288
	1900-01-01 02:00:00	0.935123	0.922701	0.991452	0.862333	0.869905	0.896093	0.934805	0.871111	0.926732	0.919719	0.916524	0.942512	0.835202	0.847332	0.894276	0.890148			1900-01-01 13:00:00	0.875863	0.837068	0.852775	0.837572			21:00:00	0.915237	0.894359	0.914904	0.904547
	1900-01-01 03:00:00	0.928644	0.933438	0.972989	0.85966	0.848742	0.903448	0.910438	0.872143	0.912012	0.915617	0.878558	0.930904	0.803715	0.881807	0.883289	0.886103			1900-01-01 14:00:00	0.894715	0.862379	0.858428	0.836771			22:00:00	0.929698	0.914241	0.926689	0.914829
	1900-01-01 04:00:00	0.940196	0.914632	0.949229	0.854606	0.901899	0.888521	0.923463	0.869401	0.919545	0.899618	0.864614	0.934311	0.812313	0.884597	0.870736	0.856588			1900-01-01 15:00:00	0.886176	0.847391	0.865398	0.827796			23:00:00	0.936088	0.914524	0.934768	0.924609
	1900-01-01 05:00:00	0.931528	0.890333	0.916577	0.872243	0.88715	0.848438	0.923703	0.854945	0.89693	0.860678	0.832316	0.943094	0.809065	0.84425	0.873817	0.836466			1900-01-01 16:00:00	0.901293	0.860534	0.861873	0.849325			1900-01-01	0.94272	0.92597	0.941992	0.929892
	1900-01-01 06:00:00	0.935135	0.921626	0.892819	0.872418	0.887772	0.906076	0.932765	0.872332	0.902461	0.84698	0.815968	0.941058	0.828383	0.858965	0.906165	0.874862			1900-01-01 17:00:00	0.910349	0.874032	0.869605	0.861655			1900-01-01 01:00:00	0.949821	0.910712	0.943325	0.927438
	1900-01-01 07:00:00	0.944406	0.940135	0.891172	0.863266	0.908883	0.880227	0.909231	0.869339	0.910989	0.8725	0.810002	0.945249	0.833505	0.85851	0.891605	0.880483			1900-01-01 18:00:00	0.911329	0.854104	0.862392	0.855857			1900-01-01 02:00:00	0.947633	0.898497	0.939615	0.913785
Day 2	1900-01-01 08:00:00	0.922571	0.922613	0.906312	0.861634	0.896145	0.837601	0.875021	0.817546	0.925094	0.886686	0.847128	0.946597	0.826483	0.856274	0.900229	0.859855			1900-01-01 19:00:00	0.908486	0.866818	0.879593	0.874423			1900-01-01 03:00:00	0.93428	0.894242	0.923397	0.898746
	1900-01-01 09:00:00	0.908948	0.938629	0.866381	0.816865	0.902524	0.807743	0.874646	0.79408	0.899963	0.853373	0.81204	0.886517	0.806429	0.822063	0.858168	0.848222		Day 3	1900-01-02 08:00:00	0.903862	0.88135	0.878062	0.917885			1900-01-01 04:00:00	0.908936	0.873066	0.912146	0.891566
	1900-01-01 10:00:00	1.07529	0.908566	0.882563	0.860315	1.06818	0.802489	0.886759	0.809866	1.03652	0.884188	0.814782	0.861953	0.93335	0.816621	0.871636	0.847115			1900-01-02 09:00:00	0.89676	0.886058	0.877186	0.893453			1900-01-01 05:00:00	0.905426	0.879504	0.91368	0.896739
	1900-01-01 11:00:00	0.864299	0.895105	0.897217	0.834204	0.863424	0.806608	0.902861	0.82883	0.82934	0.896701	0.850032	0.879314	0.803486	0.897146	0.868286	0.811858			1900-01-02 10:00:00	0.901917	0.881031	0.869312	0.883484			1900-01-01 06:00:00	0.913741	0.905658	0.921129	0.912386
	1900-01-01 12:00:00	0.85592	0.882766	0.90434	0.849347	0.86848	0.807788	0.847104	0.829625	0.830904	0.864701	0.840859	0.858057	0.802043	0.901037	0.891302	0.833326			1900-01-02 11:00:00	0.871509	0.847745	0.874206	0.873027			1900-01-01 07:00:00	0.92658	0.904982	0.905792	0.92522
	1900-01-01 13:00:00	0.901351	0.848949	0.921371	0.83178	0.885843	0.792939	0.846978	0.822511	0.846952	0.843191	0.819108	0.901849	0.812312	0.895507	0.813157	0.829313			1900-01-02 12:00:00	0.893876	0.850324	0.873322	0.843435		Day 3	20:00:00	0.906903	0.867014	0.896085	0.893203
	1900-01-01 14:00:00	0.924411	0.881461	0.891312	0.881677	0.93628	0.829655	0.828978	0.854602	0.837152	0.825936	0.845899	0.924726	0.830548	0.847116	0.812777	0.856642			1900-01-02 13:00:00	0.894989	0.856827	0.86155	0.882138			21:00:00	0.918686	0.909409	0.9184	0.923631
	1900-01-01 15:00:00	0.911014	0.858485	0.918976	0.856229	0.907151	0.80574	0.836319	0.840355	0.862396	0.80854	0.88068	0.909978	0.819453	0.85183	0.815921	0.823979			1900-01-02 14:00:00	0.869056	0.854371	0.870322	0.891153			22:00:00	0.939346	0.926952	0.931885	0.931607
	1900-01-01 16:00:00	0.922761	0.883923	0.927968	0.870518	0.920716	0.81216	0.837547	0.871714	0.868401	0.819539	0.884477	0.875075	0.827118	0.906943	0.83409	0.82915			1900-01-02 15:00:00	0.898388	0.838356	0.855396	0.897317			23:00:00	0.937823	0.928179	0.943685	0.935113
	1900-01-01 17:00:00	0.89314	0.906437	0.962172	0.879647	0.905579	0.805601	0.900563	0.884386	0.867291	0.828236	0.875482	0.907409	0.824818	0.923653	0.87905	0.819101			1900-01-02 16:00:00	0.898575	0.825055	0.869873	0.876867			1900-01-01	0.94776	0.934449	0.954013	0.942401
	1900-01-01 18:00:00	0.910669	0.90495	0.935687	0.894011	0.868727	0.800763	0.903125	0.843799	0.837272	0.820112	0.885493	0.906692	0.818718	0.917336	0.849909	0.837465			1900-01-02 17:00:00	0.910094	0.832499	0.876864	0.875183			1900-01-01 01:00:00	0.941109	0.925624	0.94457	0.924465
	1900-01-01 19:00:00	0.92112	0.905584	0.915415	0.891827	0.90047	0.83391	0.87215	0.86074	0.889971	0.832153	0.886072	0.910175	0.855684	0.93678	0.857011	0.848218			1900-01-02 18:00:00	0.920028	0.842163	0.876923	0.883649			1900-01-01 02:00:00	0.943512	0.926598	0.939989	0.92476
	1900-01-01 20:00:00	0.924231	0.912393	0.871138	0.885231	0.890874	0.851672	0.892129	0.896994	0.903152	0.875825	0.89276	0.915941	0.853038	0.929713	0.880735	0.885667			1900-01-02 19:00:00	0.91198	0.865384	0.883007	0.883433			1900-01-01 03:00:00	0.930402	0.886514	0.921573	0.900358
	1900-01-01 21:00:00	0.946535	0.928017	0.896853	0.889542	0.905587	0.850999	0.919583	0.901268	0.921455	0.890865	0.908946	0.93835	0.877355	0.921186	0.904373	0.915276		Day 4	1900-01-03 08:00:00	0.907249	0.880264	0.88144	0.922947			1900-01-01 04:00:00	0.931764	0.888498	0.921219	0.898254
	1900-01-01 22:00:00	0.951153	0.937997	0.921821	0.907819	0.922474	0.89281	0.931353	0.910328	0.930213	0.90881	0.92621	0.941524	0.900561	0.928558	0.899815	0.930384			1900-01-03 09:00:00	0.902814	0.88344	0.868339	0.896903			1900-01-01 05:00:00	0.916362	0.909386	0.912819	0.899902
	1900-01-01 23:00:00	0.951007	0.938719	0.944141	0.910483	0.934577	0.880352	0.927543	0.915624	0.927906	0.921329	0.937496	0.952343	0.911651	0.929951	0.925153	0.931682			1900-01-03 10:00:00	0.899367	0.883544	0.839044	0.887881			1900-01-01 06:00:00	0.932841	0.901018	0.908273	0.919349
	1900-01-02	0.962366	0.955354	0.94995	0.903212	0.941522	0.901736	0.946823	0.9138	0.940612	0.918487	0.95036	0.958507	0.913122	0.941873	0.937831	0.926741			1900-01-03 11:00:00	0.888233	0.864387	0.843458	0.867973			1900-01-01 07:00:00	0.935039	0.896973	0.894052	0.925498
	1900-01-02 01:00:00	0.965436	0.959608	0.980285	0.893953	0.940178	0.891775	0.912628	0.898267	0.933972	0.925687	0.949744	0.963898	0.913269	0.953049	0.9252	0.918232			1900-01-03 12:00:00	0.905936	0.864751	0.84444	0.853239		Day 4	20:00:00	0.905505	0.892718	0.892689	0.893878
	1900-01-02 02:00:00	0.970014	0.960654	0.949448	0.910417	0.938355	0.86646	0.867186	0.921989	0.929757	0.907462	0.949192	0.97205	0.903639	0.947777	0.916517	0.887207			1900-01-03 13:00:00	0.907958	0.87738	0.869157	0.871117			21:00:00	0.923831	0.912051	0.911633	0.918568
	1900-01-02 03:00:00	0.970771	0.943502	0.927541	0.895304	0.954827	0.844071	0.862182	0.915886	0.90625	0.892241	0.941196	0.9539	0.912203	0.951711	0.896751	0.83432			1900-01-03 14:00:00	0.893395	0.874555	0.853487	0.877997			22:00:00	0.935462	0.925806	0.921761	0.926975
	1900-01-02 04:00:00	0.95731	0.90746	0.910782	0.860191	0.9249	0.803119	0.866221	0.898023	0.905998	0.883814	0.918279	0.940491	0.881554	0.955473	0.881565	0.847671			1900-01-03 15:00:00	0.883985	0.866822	0.872974	0.870935			23:00:00	0.940718	0.922895	0.929891	0.937975
	1900-01-02 05:00:00	0.932526	0.902296	0.898405	0.888478	0.918523	0.79771	0.886226	0.915558	0.901422	0.90145	0.919269	0.932581	0.888412	0.95694	0.864289	0.877315			1900-01-03 16:00:00	0.898041	0.881262	0.873527	0.871776			1900-01-01	0.947812	0.921058	0.936577	0.943139
	1900-01-02 06:00:00	0.921947	0.909664	0.912712	0.91064	0.939654	0.850473	0.908804	0.9237	0.90551	0.896462	0.923197	0.959346	0.896571	0.948726	0.889058	0.915191			1900-01-03 17:00:00	0.890271	0.883219	0.871957	0.86008			1900-01-01 01:00:00	0.940836	0.907716	0.927171	0.93644
	1900-01-02 07:00:00	0.940705	0.890943	0.938345	0.936326	0.94346	0.828233	0.906466	0.941768	0.910303	0.90985	0.869159	0.933854	0.915992	0.961951	0.904398	0.918541			1900-01-03 18:00:00	0.910079	0.888139	0.878875	0.868616			1900-01-01 02:00:00	0.93021	0.901836	0.907407	0.931881
Day 3	1900-01-02 08:00:00	0.940193	0.880544	0.871691	0.923022	0.905781	0.849372	0.857364	0.912882	0.882673	0.902	0.824054	0.903523	0.923524	0.952632	0.880351	0.915036			1900-01-03 19:00:00	0.899793	0.87838	0.903516	0.875731			1900-01-01 03:00:00	0.921068	0.882851	0.889378	0.921234
	1900-01-02 09:00:00	0.888102	0.897379	0.893552	0.908007	0.936247	0.820372	0.885002	0.902611	0.855298	0.874971	0.906233	0.872241	0.91081	0.950852	0.837321	0.87483		Day 5	1900-01-04 08:00:00	0.888002	0.879156	0.885383	0.874658			1900-01-01 04:00:00	0.900617	0.867203	0.885255	0.908567
	1900-01-02 10:00:00	0.932399	0.886073	0.882935	0.906259	0.919972	0.815579	0.874356	0.914216	0.855446	0.837091	0.855517	0.929193	0.885958	0.930421	0.831089	0.886467			1900-01-04 09:00:00	0.862587	0.858494	0.862872	0.862058			1900-01-01 05:00:00	0.891246	0.891136	0.896232	0.907336
	1900-01-02 11:00:00	0.874834	0.867626	0.837677	0.905897	0.871706	0.798277	0.837504	0.883492	0.832944	0.891176	0.892404	0.880299	0.864475	0.923955	0.850213	0.853465			1900-01-04 10:00:00	0.878275	0.854967	0.874018	0.869587			1900-01-01 06:00:00	0.90247	0.891858	0.886405	0.909138
	1900-01-02 12:00:00	0.923493	0.862628	0.906172	0.883213	0.890368	0.754446	0.887911	0.868573	0.852163	0.850827	0.89932	0.890979	0.818382	0.870201	0.809489	0.875668			1900-01-04 11:00:00	0.885297	0.833003	0.873955	0.859938			1900-01-01 07:00:00	0.903653	0.893124	0.869476	0.889569
	1900-01-02 13:00:00	0.904812	0.858627	0.926268	0.89025	0.866565	0.762271	0.909591	0.888879	0.81742	0.871005	0.890052	0.867724	0.848066	0.952571	0.886446	0.84147			1900-01-04 12:00:00	0.88999	0.837372	0.873862	0.855306		Day 5	20:00:00	0.910963	0.881219	0.901872	0.910419
	1900-01-02 14:00:00	0.886796	0.884052	0.84092	0.864457	0.912936	0.772843	0.874554	0.857151	0.838537	0.850348	0.889835	0.902568	0.846697	0.977392	0.860439	0.880085			1900-01-04 13:00:00	0.889548	0.839041	0.857767	0.872696			21:00:00	0.929512	0.9173	0.91985	0.930596
	1900-01-02 15:00:00	0.921901	0.907456	0.902603	0.861592	0.896707	0.76553	0.902642	0.788546	0.823807	0.829495	0.862752	0.905532	0.861625	0.974216	0.89753	0.855899			1900-01-04 14:00:00	0.894297	0.855834	0.859641	0.895271			22:00:00	0.940212	0.929386	0.92253	0.947336
	1900-01-02 16:00:00	0.89959	0.894051	0.901982	0.898677	0.861564	0.755953	0.881383	0.801318	0.853676	0.827537	0.873761	0.924519	0.823629	0.939174	0.873302	0.871362			1900-01-04 15:00:00	0.888023	0.859457	0.859473	0.896122			23:00:00	0.940099	0.930018	0.927619	0.948041
	1900-01-02 17:00:00	0.930413	0.925835	0.90656	0.877567	0.837642	0.757386	0.888007	0.846961	0.858057	0.878252	0.850876	0.920272	0.84926	0.880899	0.874646	0.895928			1900-01-04 16:00:00	0.929088	0.864715	0.8636	0.911864			1900-01-01	0.942275	0.939542	0.929692	0.950542
	1900-01-02 18:00:00	0.955273	0.924022	0.91984	0.880975	0.907408	0.777497	0.865321	0.818425	0.854197	0.888721	0.854817	0.909958	0.876012	0.925137	0.872202	0.861245			1900-01-04 17:00:00	0.905132	0.886531	0.886196	0.898471			1900-01-01 01:00:00	0.94705	0.938305	0.929154	0.950929
	1900-01-02 19:00:00	0.934537	0.90742	0.903942	0.902021	0.877208	0.84832	0.875741	0.860264	0.844772	0.900646	0.858874	0.927735	0.854689	0.906671	0.864322	0.90805			1900-01-04 18:00:00	0.912899	0.861631	0.8828	0.904751			1900-01-01 02:00:00	0.920687	0.938784	0.916408	0.925563
	1900-01-02 20:00:00	0.926794	0.897155	0.890173	0.91349	0.865393	0.832702	0.889989	0.87997	0.876054	0.898799	0.890153	0.919334	0.878609	0.896606	0.885892	0.911706			1900-01-04 19:00:00	0.905827	0.873204	0.893233	0.905464			1900-01-01 03:00:00	0.91797	0.914362	0.900692	0.909284
	1900-01-02 21:00:00	0.949537	0.902989	0.907836	0.914384	0.917605	0.888674	0.916831	0.914524	0.921272	0.900399	0.921906	0.930024	0.907522	0.929038	0.924209	0.933755										1900-01-01 04:00:00	0.904308	0.891302	0.883619	0.888021
	1900-01-02 22:00:00	0.959849	0.921721	0.938406	0.93741	0.948559	0.906584	0.938124	0.914541	0.91942	0.921373	0.936271	0.950474	0.916038	0.94133	0.932547	0.936512										1900-01-01 05:00:00	0.8949	0.91347	0.886415	0.882408
	1900-01-02 23:00:00	0.950439	0.936181	0.937137	0.927535	0.942388	0.921775	0.932163	0.916392	0.934074	0.93784	0.954025	0.948802	0.910301	0.951938	0.928473	0.949741										1900-01-01 06:00:00	0.898123	0.915386	0.89382	0.892696
	1900-01-03	0.97456	0.956973	0.947398	0.91211	0.958744	0.935315	0.931743	0.911997	0.945118	0.948219	0.962997	0.959719	0.937851	0.973726	0.90944	0.948587										1900-01-01 07:00:00	0.900819	0.912262	0.88264	0.888018
	1900-01-03 01:00:00	0.979242	0.948533	0.945473	0.891189	0.953599	0.918818	0.930463	0.899616	0.960218	0.929914	0.949806	0.938342	0.903974	0.957692	0.919131	0.917062
	1900-01-03 02:00:00	0.997847	0.960454	0.943432	0.872317	0.963712	0.932008	0.921913	0.88876	0.967685	0.924085	0.942997	0.925191	0.930555	0.958093	0.908783	0.90161
	1900-01-03 03:00:00	0.981812	0.9558	0.925024	0.858974	0.920031	0.918477	0.898723	0.808827	0.936219	0.921738	0.925093	0.903242	0.91407	0.93927	0.837275	0.910818
	1900-01-03 04:00:00	0.986361	0.988906	0.884758	0.867033	0.914862	0.888547	0.919333	0.831249	0.923354	0.92349	0.911103	0.926928	0.902012	0.940308	0.858532	0.892166
	1900-01-03 05:00:00	0.944926	0.952962	0.886656	0.880906	0.922611	0.908335	0.925556	0.881043	0.911753	0.921802	0.89493	0.922792	0.881293	0.909611	0.90192	0.906784
	1900-01-03 06:00:00	0.967931	0.962859	0.875999	0.924575	0.923219	0.915124	0.892137	0.873593	0.929286	0.903779	0.887782	0.912244	0.924684	0.916785	0.907198	0.928729
	1900-01-03 07:00:00	0.966097	0.974284	0.876795	0.92298	0.932102	0.928192	0.846427	0.881172	0.948288	0.891342	0.840803	0.895776	0.935722	0.898807	0.927096	0.940365
Day 4	1900-01-03 08:00:00	0.940395	0.920137	0.86324	0.905223	0.908311	0.92133	0.843744	0.847672	0.916312	0.844325	0.871058	0.894063	0.945334	0.898908	0.902385	0.945163
	1900-01-03 09:00:00	0.94297	0.907826	0.887406	0.873054	0.948443	0.904985	0.873057	0.807277	0.870863	0.886348	0.848264	0.867881	0.922456	0.898572	0.874203	0.892383
	1900-01-03 10:00:00	0.903665	0.933806	0.899297	0.860699	0.915568	0.891118	0.89279	0.834699	0.835434	0.837827	0.822647	0.86027	0.915793	0.884572	0.879016	0.872145
	1900-01-03 11:00:00	0.855515	0.906338	0.896701	0.894379	0.882873	0.871237	0.894227	0.809209	0.821845	0.841671	0.855268	0.85505	0.859514	0.879388	0.849235	0.883755
	1900-01-03 12:00:00	0.879847	0.947225	0.883079	0.91359	0.920468	0.854899	0.855517	0.828122	0.869008	0.848595	0.819949	0.840206	0.863919	0.843718	0.86053	0.844788
	1900-01-03 13:00:00	0.912858	0.93052	0.914771	0.873684	0.961386	0.86235	0.888758	0.797026	0.902981	0.854793	0.872976	0.845879	0.913461	0.866446	0.858607	0.845953
	1900-01-03 14:00:00	0.904059	0.955186	0.872314	0.84202	0.925523	0.871979	0.902333	0.798385	0.872657	0.827513	0.856182	0.857595	0.927068	0.853417	0.893176	0.838326
	1900-01-03 15:00:00	0.850192	0.966654	0.86231	0.856782	0.899245	0.869757	0.857617	0.840668	0.899105	0.856126	0.873139	0.863524	0.909391	0.878566	0.849628	0.846153
	1900-01-03 16:00:00	0.901972	0.962673	0.871189	0.856328	0.876689	0.937688	0.881349	0.829323	0.881732	0.880603	0.865468	0.866306	0.914502	0.888564	0.86057	0.823469
	1900-01-03 17:00:00	0.901436	0.968805	0.845141	0.8457	0.897562	0.92042	0.874171	0.840724	0.882371	0.855975	0.878494	0.870987	0.912988	0.853202	0.861651	0.81248
	1900-01-03 18:00:00	0.930067	0.967531	0.868134	0.874582	0.90977	0.917461	0.910267	0.815059	0.878979	0.897496	0.850019	0.889007	0.91549	0.827143	0.875104	0.856725
	1900-01-03 19:00:00	0.910033	0.962343	0.834227	0.892568	0.889899	0.916284	0.89288	0.814457	0.88839	0.912112	0.894888	0.918673	0.912467	0.840878	0.905184	0.844395
	1900-01-03 20:00:00	0.911804	0.939551	0.87162	0.899046	0.896483	0.899923	0.895426	0.879041	0.901204	0.90076	0.866495	0.902299	0.90763	0.853001	0.913919	0.900964
	1900-01-03 21:00:00	0.933577	0.939656	0.907632	0.914457	0.915008	0.918185	0.913033	0.90198	0.923631	0.911223	0.88953	0.922148	0.914407	0.915944	0.924728	0.919193
	1900-01-03 22:00:00	0.946612	0.953307	0.916002	0.925928	0.931355	0.92994	0.919094	0.922836	0.920183	0.91256	0.922784	0.931516	0.919118	0.927965	0.930272	0.930544
	1900-01-03 23:00:00	0.947402	0.958811	0.920976	0.935683	0.927049	0.926414	0.922345	0.915773	0.915295	0.923786	0.936675	0.943807	0.929613	0.933668	0.953576	0.935043
	1900-01-04	0.963364	0.970731	0.935519	0.921633	0.928174	0.940421	0.913418	0.902217	0.928026	0.93088	0.931296	0.956105	0.936748	0.950328	0.946118	0.939361
	1900-01-04 01:00:00	0.964479	0.962516	0.930117	0.906233	0.932384	0.945247	0.898383	0.85485	0.913041	0.933193	0.931516	0.930934	0.936007	0.943281	0.947562	0.918909
	1900-01-04 02:00:00	0.95274	0.968049	0.93093	0.869122	0.919164	0.950905	0.858026	0.879247	0.901618	0.934419	0.902657	0.890932	0.92403	0.952735	0.942605	0.908154
	1900-01-04 03:00:00	0.920426	0.966399	0.934818	0.86263	0.891766	0.922921	0.850508	0.866211	0.881389	0.925124	0.886847	0.864153	0.926164	0.930435	0.9468	0.881538
	1900-01-04 04:00:00	0.901771	0.933915	0.921926	0.844855	0.854012	0.893475	0.836488	0.884838	0.841853	0.918089	0.905816	0.875263	0.921749	0.922411	0.919787	0.870321
	1900-01-04 05:00:00	0.853097	0.924227	0.916783	0.870877	0.853807	0.934321	0.882791	0.893624	0.863988	0.92185	0.901657	0.897433	0.918334	0.888695	0.920074	0.902242
	1900-01-04 06:00:00	0.910818	0.90816	0.911038	0.879863	0.825901	0.926773	0.912307	0.902452	0.872251	0.872107	0.886826	0.914437	0.923075	0.870474	0.937505	0.905499
	1900-01-04 07:00:00	0.916422	0.894114	0.907095	0.896982	0.81861	0.942587	0.91014	0.901159	0.853172	0.846398	0.86498	0.913355	0.91824	0.837219	0.94685	0.855965
Day 5	1900-01-04 08:00:00	0.883701	0.912252	0.863076	0.89298	0.833279	0.91015	0.878646	0.89455	0.860026	0.891485	0.885091	0.904932	0.883618	0.810359	0.968718	0.835939
	1900-01-04 09:00:00	0.840684	0.886472	0.870906	0.852285	0.806339	0.861862	0.89243	0.873344	0.818372	0.898081	0.872105	0.862931	0.860724	0.791792	0.961883	0.833832
	1900-01-04 10:00:00	0.829831	0.915712	0.877899	0.889657	0.813493	0.850287	0.893644	0.862444	0.844142	0.927994	0.854899	0.869036	0.889159	0.794642	0.976128	0.818418
	1900-01-04 11:00:00	0.824063	0.924172	0.896876	0.896076	0.788374	0.833675	0.870767	0.839196	0.830991	0.899193	0.883944	0.88169	0.848252	0.789184	0.967123	0.835192
	1900-01-04 12:00:00	0.87501	0.959797	0.862158	0.862993	0.810943	0.846104	0.833655	0.858786	0.853907	0.918149	0.847562	0.87583	0.870626	0.782434	0.936384	0.83178
	1900-01-04 13:00:00	0.843186	0.939512	0.908995	0.8665	0.811857	0.841883	0.866935	0.83549	0.83096	0.886999	0.824032	0.889075	0.858242	0.781531	0.942301	0.90871
	1900-01-04 14:00:00	0.895087	0.904495	0.910051	0.867554	0.840952	0.890404	0.847304	0.844674	0.84179	0.873237	0.83291	0.890627	0.87266	0.840935	0.940047	0.927441
	1900-01-04 15:00:00	0.877299	0.914696	0.908234	0.851864	0.846417	0.835125	0.881777	0.87451	0.84177	0.857758	0.878498	0.859867	0.903198	0.826888	0.927213	0.927189
	1900-01-04 16:00:00	0.892279	1.03324	0.912552	0.878278	0.841901	0.911398	0.849473	0.856087	0.840159	0.906059	0.872322	0.83586	0.889235	0.910932	0.930076	0.917214
	1900-01-04 17:00:00	0.845347	0.961858	0.912499	0.900823	0.832615	0.93669	0.892386	0.884431	0.861754	0.932796	0.878024	0.872211	0.863862	0.884308	0.919019	0.926695
	1900-01-04 18:00:00	0.898342	0.930772	0.900428	0.922054	0.816721	0.866945	0.879691	0.883167	0.881845	0.905509	0.874794	0.869051	0.875661	0.892973	0.900679	0.949692
	1900-01-04 19:00:00	0.887156	0.918674	0.904972	0.912506	0.888636	0.881807	0.864257	0.858114	0.888085	0.910999	0.887965	0.885882	0.890023	0.854423	0.931391	0.94602
	1900-01-04 20:00:00	0.920178	0.913291	0.900809	0.909575	0.890686	0.867699	0.884074	0.882417	0.902515	0.915282	0.887581	0.90211	0.907309	0.862357	0.939575	0.932436
	1900-01-04 21:00:00	0.938439	0.944183	0.91409	0.921334	0.929957	0.918111	0.911091	0.910042	0.922119	0.921052	0.909243	0.926987	0.925443	0.910013	0.950927	0.935999
	1900-01-04 22:00:00	0.964526	0.936325	0.92343	0.936568	0.925958	0.923636	0.926021	0.94193	0.925356	0.920421	0.921836	0.922508	0.948265	0.922642	0.956364	0.962071
	1900-01-04 23:00:00	0.944947	0.953862	0.923712	0.937875	0.92145	0.931818	0.934096	0.932707	0.932206	0.924568	0.932659	0.921043	0.934006	0.943209	0.956885	0.958062
	1900-01-05	0.967781	0.936257	0.934847	0.930213	0.935078	0.932738	0.940392	0.949959	0.917327	0.929412	0.942884	0.929144	0.924396	0.937101	0.975083	0.965587
	1900-01-05 01:00:00	0.969079	0.945531	0.93884	0.93475	0.928892	0.944013	0.935824	0.94449	0.923718	0.933107	0.923227	0.936563	0.920674	0.948209	0.974819	0.960015
	1900-01-05 02:00:00	0.936437	0.898932	0.938309	0.909069	0.928569	0.945634	0.930911	0.950023	0.909557	0.926352	0.900817	0.928908	0.900867	0.911294	0.94365	0.946439
	1900-01-05 03:00:00	0.977418	0.871084	0.920185	0.903192	0.907297	0.920085	0.898837	0.931228	0.906399	0.893281	0.893464	0.909627	0.895035	0.883815	0.948403	0.909884
	1900-01-05 04:00:00	0.925196	0.896003	0.899256	0.896775	0.87691	0.891282	0.896049	0.900967	0.896828	0.876002	0.879014	0.882634	0.873825	0.90452	0.899448	0.874289
	1900-01-05 05:00:00	0.889002	0.887812	0.887785	0.915001	0.897681	0.90388	0.921494	0.930824	0.903358	0.85625	0.891656	0.894396	0.891819	0.892268	0.882077	0.863469
	1900-01-05 06:00:00	0.882452	0.889982	0.905431	0.914628	0.884707	0.930675	0.922269	0.923892	0.913519	0.877497	0.893087	0.891176	0.911681	0.84197	0.911528	0.905605
	1900-01-05 07:00:00	0.916269	0.870776	0.889551	0.92668	0.899975	0.913074	0.892775	0.943224	0.895387	0.876112	0.879252	0.879809	0.891706	0.822997	0.944922	0.892448
Day 6	1900-01-05 08:00:00	0.87284	0.890044	0.878803	0.904958	0.870368	0.879133	0.87662	0.956727	0.84967	0.89471	0.893591	0.841202	0.844465	0.800525	0.91365	0.878661
	1900-01-05 09:00:00	0.874644	0.856702	0.923121	0.871521	0.835381	0.829299	0.858811	0.943839	0.839312	0.8831	0.829293	0.835154	0.820404	0.78573	0.909892	0.885009
	1900-01-05 10:00:00	0.852653	0.855525	0.92668	0.849216	0.82876	0.820903	0.854632	0.916283	0.850974	0.891409	0.88615	0.823517	0.839086	0.77956	0.930584	0.869043
	1900-01-05 11:00:00	0.851818	0.876116	0.939111	0.873104	0.879949	0.817495	0.88375	0.897892	0.865861	0.876207	0.889025	0.811779	0.828997	0.776265	0.908591	0.841529
	1900-01-05 12:00:00	0.833877	0.851645	0.89664	0.870798	0.845058	0.843293	0.897183	0.877865	0.838803	0.847796	0.882221	0.824928	0.867773	0.7605	0.874947	0.823572
	1900-01-05 13:00:00	0.81352	0.810367	0.899042	0.864072	0.859045	0.868612	0.84157	0.943673	0.874909	0.854415	0.855489	0.835946	0.896054	0.844235	0.886585	0.873243
	1900-01-05 14:00:00	0.809394	0.795172	0.927074	0.882476	0.835091	0.862841	0.875384	0.933855	0.845978	0.840469	0.867405	0.826173	0.904083	0.832985	0.882456	0.814516
	1900-01-05 15:00:00	0.87156	0.817978	0.899945	0.834284	0.814755	0.873248	0.86461	0.892424	0.862193	0.896434	0.86387	0.824406	0.886132	0.844176	0.892459	0.814317
	1900-01-05 16:00:00	0.879961	0.818493	0.897763	0.863204	0.837105	0.888832	0.840368	0.936346	0.836004	0.901851	0.868589	0.840404	0.892503	0.802926	0.902693	0.830921
	1900-01-05 17:00:00	0.848244	0.836731	0.868698	0.885844	0.807701	0.864062	0.907826	0.945771	0.857657	0.901267	0.870176	0.844058	0.895565	0.797514	0.932153	0.826486
	1900-01-05 18:00:00	0.881585	0.861756	0.852079	0.887054	0.802211	0.860644	0.896592	0.898807	0.866249	0.90506	0.816782	0.832898	0.853663	0.858516	0.888177	0.817057
	1900-01-05 19:00:00	0.89448	0.876966	0.875828	0.898601	0.795302	0.823189	0.899842	0.881335	0.875327	0.916204	0.798672	0.835544	0.871682	0.855475	0.927492	0.823732
	1900-01-05 20:00:00	0.911181	0.884061	0.868945	0.901534	0.861587	0.87987	0.893934	0.909673	0.897983	0.904647	0.855355	0.875286	0.914333	0.880343	0.941876	0.829791
	1900-01-05 21:00:00	0.934845	0.935513	0.900488	0.908357	0.911393	0.919139	0.904553	0.932412	0.912496	0.910271	0.886059	0.907025	0.922081	0.907495	0.953792	0.903527
	1900-01-05 22:00:00	0.950422	0.938629	0.907922	0.925611	0.921484	0.935178	0.920602	0.969051	0.922188	0.923416	0.9041	0.920021	0.937371	0.915336	0.96598	0.916639
	1900-01-05 23:00:00	0.944853	0.920041	0.927368	0.926995	0.921757	0.93624	0.912249	0.962588	0.92749	0.92757	0.92277	0.923064	0.941492	0.930173	0.960568	0.930504
	1900-01-06	0.966977	0.917789	0.909104	0.924857	0.928089	0.945026	0.898486	0.965993	0.920953	0.916428	0.91915	0.937159	0.929593	0.928117	0.970459	0.928174
	1900-01-06 01:00:00	0.941503	0.893677	0.940539	0.926808	0.966802	0.928039	0.889182	0.982792	0.929501	0.912785	0.93258	0.925063	0.915959	0.936989	0.976848	0.917829
	1900-01-06 02:00:00	0.941689	0.860743	0.918157	0.913529	0.934997	0.904699	0.865383	0.935526	0.91837	0.888843	0.935899	0.926022	0.901941	0.909383	0.953624	0.901308
	1900-01-06 03:00:00	0.928735	0.830467	0.927787	0.90395	0.938645	0.861693	0.850733	0.929075	0.91442	0.845074	0.946563	0.915233	0.854596	0.853562	0.947778	0.874846
	1900-01-06 04:00:00	0.945232	0.820892	0.918535	0.889782	0.940068	0.868409	0.861239	0.896102	0.890594	0.859468	0.949276	0.905507	0.840303	0.808343	0.910682	0.856068
	1900-01-06 05:00:00	0.886641	0.81808	0.92822	0.889532	0.915035	0.861713	0.882307	0.906307	0.902631	0.85606	0.942802	0.907407	0.89197	0.881772	0.904237	0.872638
	1900-01-06 06:00:00	0.896763	0.852187	0.923889	0.884539	0.912774	0.921805	0.894668	0.923943	0.896033	0.863209	0.946727	0.911872	0.894824	0.868931	0.94583	0.887523
	1900-01-06 07:00:00	0.898025	0.865182	0.910572	0.871057	0.91961	0.889965	0.901215	0.928025	0.907329	0.845964	0.966479	0.897165	0.875089	0.836962	0.947235	0.874379
Day 7	1900-01-06 08:00:00	0.88104	0.811426	0.897146	0.880449	0.902922	0.85934	0.884926	0.932383	0.893462	0.8621	0.940989	0.879129	0.827506	0.788435	0.914929	0.877064
	1900-01-06 09:00:00	0.866763	0.837395	0.852695	0.856691	0.865013	0.835112	0.861418	0.932499	0.896036	0.847765	0.935751	0.843374	0.809692	0.803075	0.87698	0.832653
	1900-01-06 10:00:00	0.843612	0.845085	0.878572	0.821196	0.845768	0.799678	0.847554	0.912059	0.871784	0.835619	0.924278	0.842158	0.84139	0.797302	0.853896	0.827592
	1900-01-06 11:00:00	0.839266	0.851927	0.877582	0.870318	0.836704	0.840797	0.839354	0.928006	0.865223	0.845792	0.93133	0.817332	0.842548	0.800814	0.827593	0.837066
	1900-01-06 12:00:00	0.825866	0.868223	0.862351	0.91213	0.830962	0.809647	0.836013	0.941334	0.843066	0.827496	0.947459	0.868386	0.856215	0.78447	0.831941	0.878638
	1900-01-06 13:00:00	0.910693	0.834286	0.868006	0.895203	0.909639	0.803665	0.896887	0.939627	0.887782	0.877565	0.934986	0.821399	0.881762	0.809046	0.901214	0.873066
	1900-01-06 14:00:00	0.89504	0.876625	0.885566	0.901389	0.932289	0.819712	0.940002	0.945998	0.883487	0.875666	0.947233	0.860332	0.867239	0.853995	0.863043	0.898102
	1900-01-06 15:00:00	0.886832	0.862705	0.879905	0.874559	0.922939	0.810417	0.914555	0.917833	0.863818	0.881119	0.933163	0.881561	0.868048	0.872045	0.894706	0.89139
	1900-01-06 16:00:00	0.923435	0.886566	0.881125	0.869125	0.911016	0.799856	0.877644	0.939667	0.88461	0.881641	0.954647	0.888777	0.852202	0.917915	0.910583	0.907789
	1900-01-06 17:00:00	0.907192	0.906095	0.919085	0.869589	0.923362	0.811841	0.876636	0.964267	0.889145	0.904961	0.941592	0.860769	0.83633	0.929582	0.916089	0.897003
	1900-01-06 18:00:00	0.889618	0.910369	0.914445	0.901686	0.903119	0.803134	0.883472	0.952124	0.896892	0.896789	0.931239	0.874974	0.861905	0.919572	0.933794	0.885222
	1900-01-06 19:00:00	0.940061	0.914203	0.938256	0.912667	0.849609	0.839391	0.958104	0.932304	0.903648	0.905248	0.968887	0.870952	0.877539	0.899375	0.974477	0.901592
	1900-01-06 20:00:00	0.918808	0.908761	0.887892	0.908248	0.874875	0.857797	0.90974	0.932209	0.909826	0.897933	0.93429	0.892494	0.888651	0.892019	0.948279	0.912555
	1900-01-06 21:00:00	0.938081	0.922914	0.896926	0.911536	0.922068	0.894465	0.912656	0.928408	0.91333	0.896989	0.926513	0.900484	0.909531	0.916001	0.944781	0.92128
	1900-01-06 22:00:00	0.950341	0.911316	0.905539	0.929073	0.935054	0.930085	0.913488	0.954226	0.925249	0.891595	0.932203	0.913167	0.92755	0.936083	0.948398	0.936869
	1900-01-06 23:00:00	0.940258	0.921915	0.921173	0.928073	0.934334	0.907288	0.923014	0.952843	0.925992	0.909172	0.96309	0.92339	0.919365	0.949388	0.952584	0.950322
	1900-01-07	0.945055	0.90327	0.931531	0.932544	0.947049	0.92875	0.92817	0.943325	0.916015	0.911457	0.947641	0.923374	0.923307	0.94123	0.964243	0.942536
	1900-01-07 01:00:00	0.952968	0.900869	0.931946	0.929275	0.94535	0.939753	0.941901	0.945051	0.909835	0.925455	0.921488	0.943681	0.933623	0.92437	0.956452	0.935804
	1900-01-07 02:00:00	0.912727	0.870972	0.930817	0.919267	0.921965	0.964916	0.905467	0.939964	0.900523	0.91317	0.918858	0.916722	0.906047	0.878632	0.970006	0.918109
	1900-01-07 03:00:00	0.933281	0.877846	0.913541	0.914239	0.900967	0.961439	0.884416	0.90289	0.872249	0.912052	0.899704	0.896724	0.875742	0.83727	0.941203	0.888306
	1900-01-07 04:00:00	0.885604	0.897558	0.902291	0.911116	0.867394	0.943087	0.861378	0.868974	0.889109	0.912735	0.906245	0.898116	0.860366	0.852668	0.897284	0.887725
	1900-01-07 05:00:00	0.899135	0.888573	0.906505	0.915535	0.885413	0.930155	0.862172	0.889066	0.883281	0.891439	0.906054	0.917781	0.875867	0.873387	0.918876	0.883228
	1900-01-07 06:00:00	0.914896	0.890287	0.861002	0.913101	0.904973	0.941921	0.921081	0.876358	0.870904	0.879507	0.898029	0.905438	0.91839	0.867357	0.938356	0.910066
	1900-01-07 07:00:00	0.915741	0.888073	0.879218	0.859166	0.865209	0.966921	0.925822	0.911548	0.878806	0.879492	0.888756	0.895968	0.912023	0.858505	0.920859	0.900626

## Sheet: S1G
(G) Weight of eWAT in WT (+/+) and IL-6 KO (-/- mice subjected (or not, control) to bilateral cast immobilization for 7 days (n = 5-7 per group).
WT	Control 1	1.50968
	Control 2	1.44152
	Control 3	1.28214
	Control 4	0.5919
	Control 5	1.59898
	Control 6	0.903976
	Control 7	1.19844
	Imm (day 7) 1	0.856557
	Imm (day 7) 2	0.765883
	Imm (day 7) 3	0.634129
	Imm (day 7) 4	0.760831
	Imm (day 7) 5	0.758966
	Imm (day 7) 6	0.863801
	Imm (day 7) 7	0.778267
KO	Control 1	0.937991
	Control 2	1.06982
	Control 3	0.871705
	Control 4	0.667708
	Control 5	0.935673
	Control 6	0.707384
	Control 7	1.08846
	Imm (day 7) 1	1.07917
	Imm (day 7) 2	0.990774
	Imm (day 7) 3	0.863761
	Imm (day 7) 4	0.707384
	Imm (day 7) 5	0.589763
	Imm (day 7) 6	0.500169

## Sheet: S1H-J
(H–J) Serum concentrations of BCAA (Val, Ile, and Leu, respectively) concentrations of IL-6 KO and WT mice without (control) or with bilateral cast immobilization for 1 or 7 days (n = 4 per group).
Serum
μM		Valine	Isoleucine	Leucine
WT	Control 1	205.973	85.8432	164.887
	Control 2	248.996	97.8472	180.933
	Control 3	215.18	72.1307	124.212
	Control 4	209.549	82.5906	157.524
	Imm (24 h) 1	202.914	72.5748	128.949
	Imm (24 h) 2	227.695	88.4713	165.702
	Imm (24 h) 3	194.363	76.4459	144.771
	Imm (24 h) 4	216.291	83.0251	158.091
	Imm (day 7) 1	215.898	87.3843	158.122
	Imm (day 7) 2	190.072	71.625	119.842
	Imm (day 7) 3	163.098	60.1065	109.112
	Imm (day 7) 4	160.898	62.9875	119.2
KO	Control 1	291.301	108.323	186.435
	Control 2	227.218	85.1651	137.762
	Control 3	190.65	63.0077	99.0519
	Control 4	225.355	82.7729	148.779
	Imm (24 h) 1	213.121	87.1434	162.124
	Imm (24 h) 2	192.902	68.4824	127.791
	Imm (24 h) 3	223.75	86.3477	163.821
	Imm (24 h) 4	181.543	69.3622	129.102
	Imm (day 7) 1	154.279	60.4603	105.211
	Imm (day 7) 2	200.007	72.5757	120.465
	Imm (day 7) 3	178.371	64.37	109.198
	Imm (day 7) 4	187.828	71.4958	123.05
