# Supplementary material for: Brown adipose tissue and skeletal muscle coordinately contribute to thermogenesis in mice
Source: eLife. 2025 Oct 27;13:RP99982. doi: 10.7554/eLife.99982 (PMC12558653; doi:10.7554/eLife.99982)
Supplement: Figure 6—source data 1. [file elife-99982-fig6-data1.xlsx]

## Sheet: Fig.6A-C
(A–C) Concentrations of BCAAs (Val, Ile, and Leu, respectively) in the soleus of control IL-6 KO mice and at 3 h after intraperitoneal administration of recombinant IL-6 (rIL-6, 400 ng) or vehicle in IL-6 KO mice that had been subjected to bilateral cast immobilization for 24 h (n = 4 or 5 per group).
Soleus
n mol/g tissue weight	Valine	Isoleucine	Leucine
Control 1	1675.92	677.215	1186.41
Control 2	1395.01	547.782	947.505
Control 3	734.687	299.195	463.523
Control 4	281.484	115.744	192.744
Control 5	376.815	149.09	260.673
Imm 1	520.729	237.57	373.343
Imm 2	701.113	306.721	525.378
Imm 3	1797.54	809.639	1234.1
Imm 4	1362.92	600.467	933.201
Imm+rIL-6 1	1046.4	490.264	785.665
Imm+rIL-6 2	1918.19	927.934	1470.36
Imm+rIL-6 3	2459.86	1152.73	1807.2
Imm+rIL-6 4	2097	975.705	1475.75
Imm+rIL-6 5	1956.08	881.68	1435.42

## Sheet: Fig.6D
(D) BCAA concentrations in C2C12 myotubes incubated in the absence or presence of rIL-6 (50 ng/ml) for 1 h (n = 6 independent experiments) .
n mol/µg protein	Valine	Isoleucine	Leucine
Control 1	34.5002	32.0321	34.8617
Control 2	19.4115	18.107	20.4461
Control 3	33.6187	30.2761	32.9825
Control 4	67.5019	61.7592	69.9656
Control 5	90.8434	82.818	87.0373
Control 6	117.522	109.556	121.414
rIL-6 1	222.241	203.109	205.554
rIL-6 2	190.199	168.513	176.834
rIL-6 3	186.051	161.59	170.599
rIL-6 4	298.879	267.46	270.742
rIL-6 5	198.435	184.875	186.791
rIL-6 6	136.917	119.486	128.818

## Sheet: Fig.6E
(E) Rectal core body temperature during cold exposure at 4°C for 1 h for control IL-6 KO mice and for IL-6 KO mice subjected to bilateral cast immobilization for 24 h and injected intraperitoneally with rIL-6 (400 ng) or vehicle 30 min before cold challenge (n = 5 per group).
	0 h	1 h
Control 1	37.6	34.8
Control 2	38	36
Control 3	38.1	35.8
Control 4	37.4	35
Control 5	37.4	35.1
Imm 1	37.2	34.7
Imm 2	38	35.6
Imm 3	37.4	35
Imm 4	37.7	35
Imm 5	37.8	34.9
Imm+rIL-6 1	37.7	36.2
Imm+rIL-6 2	37.8	36.2
Imm+rIL-6 3	37.5	35.8
Imm+rIL-6 4	37.7	35.6
Imm+rIL-6 5	37.6	36.2

## Sheet: Fig.6F
(F) Rectal core body temperature during cold exposure at 4°C for 1 h for C57BL/6J mice with denervated iBAT subjected or not to bilateral cast immobilization and treatment with rIL-6 or vehicle as in (E) (n = 4 per group).
	0 h	1 h
Control 1	38	37.1
Control 2	38.1	37.2
Control 3	37.6	36.5
Control 4	38	37.5
Imm 1	37.5	36.4
Imm 2	37.4	34.3
Imm 3	37.5	36.7
Imm 4	38	34.4
Imm+rIL-6 1	37.3	35.6
Imm+rIL-6 2	37.4	35.6
Imm+rIL-6 3	37.9	35.3
Imm+rIL-6 4	37.99	36

## Sheet: Fig.6G
(G) Serum IL-6 concentration of mice subjected to surgical removal of iBAT and then subjected (or not, control) to bilateral cast immobilization for the indicated times (n = 4-6 per group).
pg/ml	Abs.1	Abs.2	Abs.	Abs.-blank			Abs.1	Abs.2	Abs.	Abs.-blank	conc.
0	0.026	0.024	0.025	0		Control 1	0.11	0.111	0.0905	0.0655	10.8776
7.8	0.098	0.144	0.121	0.096		Control 2	0.068	0.068	0.048	0.023	2.20408
15.6	0.124	0.145	0.1345	0.1095		Control 3	0.07	0.062	0.046	0.021	1.79592
31.3	0.187	0.246	0.2165	0.1915		Control 4	0.084	0.08	0.062	0.037	5.06122
62.5	0.363	0.414	0.3885	0.3635		Control 5	0.053	0.06	0.0365	0.0115	-
125	0.66	0.735	0.6975	0.6725		Control 6	0.044	0.05	0.027	0.002	-
250	1.164	1.403	1.2835	1.2585		Imm (10 h) 1	0.157	0.163	0.14	0.115	20.9796
						Imm (10 h) 2	0.104	0.113	0.0885	0.0635	10.4694
						Imm (10 h) 3	0.146	0.161	0.1335	0.1085	19.6531
						Imm (10 h) 4	0.073	0.081	0.057	0.032	4.04082
						Imm (10 h) 5	0.067	0.079	0.053	0.028	3.22449
						Imm (10 h) 6	0.072	0.087	0.0595	0.0345	4.55102
						Imm (24 h) 1	0.151	0.194	0.1525	0.1275	23.5306
						Imm (24 h) 2	0.185	0.216	0.1805	0.1555	29.2449
						Imm (24 h) 3	0.152	0.161	0.1365	0.1115	20.2653
						Imm (24 h) 4	0.159	0.168	0.1435	0.1185	21.6939
						Imm (24 h) 5	0.189	0.228	0.1885	0.1635	30.8776
						Imm (24 h) 6	0.107	0.13	0.0985	0.0735	12.5102
						Imm (day 3) 1	0.115	0.121	0.098	0.073	12.4082
						Imm (day 3) 2	0.163	0.182	0.1525	0.1275	23.5306
						Imm (day 3) 3	0.105	0.114	0.0895	0.0645	10.6735
						Imm (day 3) 4	0.083	0.095	0.069	0.044	6.4898
						Imm (day 3) 5	0.096	0.108	0.082	0.057	9.14286
						Imm (day 3) 6	0.103	0.108	0.0855	0.0605	9.85714
						Imm (day 5) 1	0.095	0.108	0.0815	0.0565	9.04082
						Imm (day 5) 2	0.51	0.523	0.4965	0.4715	93.7347
						Imm (day 5) 3	0.139	0.166	0.1325	0.1075	19.449
						Imm (day 5) 4	0.062	0.094	0.058	0.033	4.2449
						Imm (day 5) 5	0.108	0.15	0.109	0.084	14.6531
						Imm (day 5) 6	0.08	0.116	0.078	0.053	8.32653
						Imm (day 7) 1	0.11	0.158	0.114	0.089	15.6735
						Imm (day 7) 2	0.086	0.106	0.076	0.051	7.91837
						Imm (day 7) 3	0.101	0.119	0.09	0.065	10.7755
						Imm (day 7) 4	0.119	0.169	0.124	0.099	17.7143
						Imm (day 7) 5	0.067	0.103	0.065	0.04	5.67347
						Imm (day 7) 6	0.055	0.095	0.055	0.03	3.63265

## Sheet: Fig.6H
(H) Weight of eWAT in mice subjected to surgical removal of iBAT (or to sham surgery) followed (or not, control) by bilateral cast immobilization for 7 days (n = 5-7 per group).
% body weight
Sham	Control 1	1.32534
	Control 2	1.14453
	Control 3	1.02545
	Control 4	1.1098
	Control 5	0.923372
	Control 6	1.01493
	Control 7	1.11111
	Imm (day 7) 1	0.628788
	Imm (day 7) 2	1.08856
	Imm (day 7) 3	0.518519
	Imm (day 7) 4	0.693431
	Imm (day 7) 5	0.630522
Removed	Control 1	1.00752
	Control 2	1.06343
	Control 3	1.05
	Control 4	1.24615
	Control 5	1.28409
	Control 6	1.09339
	Control 7	1.00535
	Imm (day 7) 1	1
	Imm (day 7) 2	1.23207
	Imm (day 7) 3	0.816964
	Imm (day 7) 4	0.820717
	Imm (day 7) 5	0.52193
	Imm (day 7) 6	1.17814

## Sheet: Fig.6I-K
(I-K) Concentrations of BCAAs (Val, Ile, and Leu, respectively) in soleus of mice subjected to surgical removal of iBAT and then subjected (or not, control) to bilateral cast immobilization for the indicated times (n = 4 per group).
Soleus (n mol /g tissue)
	Valine	Isoleucine	Leucine
Control 1	212.266	77.9304	151.827
Control 2	188.297	79.2905	126.15
Control 3	208.117	85.3254	145.068
Control 4	263.386	103.11	197.293
Imm (24 h) 1	314.94	160.476	280.495
Imm (24 h) 2	385.829	190.774	328.128
Imm (24 h) 3	338.775	156.137	278.466
Imm (24 h) 4	412.853	197.343	318.858
Imm (day 3) 1	529.796	254.908	453.773
Imm (day 3) 2	415.614	214.295	359.876
Imm (day 3) 3	385.653	173.291	295.79
Imm (day 3) 4	589.393	298.79	591.595
Imm (day 5) 1	492.157	210.85	390.18
Imm (day 5) 2	456.149	190.322	328.694
Imm (day 5) 3	536.499	223.824	371.082
Imm (day 5) 4	397.065	181.872	323.947

## Sheet: S1A
(A) Amino acid concentrations in soleus of control IL-6 KO mice and at 3 h after intraperitoneal administration of recombinant IL-6 (rIL-6, 400 ng) or vehicle in IL-6 KO mice that had been subjected to bilateral cast immobilization for 24 h.
Soleus
n mole/ g tissue weight	Control 1	Control 2	Control 3	Control 4	Control 5	Imm 1	Imm 2	Imm 3	Imm 4	Imm+rIL-6 1	Imm+rIL-6 2	Imm+rIL-6 3	Imm+rIL-6 4	Imm+rIL-6 5
Gly	8875.91	9548.07	4062.21	1951.98	2336.63	2081.22	2721.98	7924.99	5303.8	5086.82	7164.17	9808.98	8269.97	8624.03
Ala	14416.6	13614.1	5758.17	3259.87	3241.8	3743.18	6670.51	18277.2	10629.7	9594.7	12715.3	13818.5	10142.6	13244
Ser	2974.72	3070.59	1291.15	619.444	719.404	988.337	1314.82	3475.07	2592.27	2210.54	3222.97	4136.06	4429.37	4333.19
Pro	1002.38	911.739	409.028	236.269	263.115	582.264	741.101	1900.79	1683.63	1454.86	1943.46	2702.14	2442.51	2446.72
Val	1675.92	1395.01	734.687	281.484	376.815	520.729	701.113	1797.54	1362.92	1046.4	1918.19	2459.86	2097	1956.08
Thr	2265	2611.78	1226.02	447.505	622.799	870.521	1046.71	3184.24	2415.22	1977.83	2937.84	3814.73	3028.95	4027.81
Ile	677.215	547.782	299.195	115.744	149.09	237.57	306.721	809.639	600.467	490.264	927.934	1152.73	975.705	881.68
Leu	1186.41	947.505	463.523	192.744	260.673	373.343	525.378	1234.1	933.201	785.665	1470.36	1807.2	1475.75	1435.42
Asn	1017.92	1092.41	521.085	249.492	293.497	415.758	398.263	1436.83	1118.9	1045.54	1575.11	1771.18	1923.95	2102.19
Asp	11101.3	11058.5	5834.89	2902	3916.03	1621.37	1506.79	8829.84	4645.61	5214.75	7113.53	6061.04	5508.27	8514.28
Gln	34449.1	38566.2	19302.7	7246.06	9419.47	9472.41	9635.71	33754.7	20962.1	22123.1	33455.7	41931.2	54856.4	37855.7
Lys	5949.92	4333.84	2044.87	888.345	1409.61	1497.57	1507.33	5060.22	4416.38	3799.93	4716.05	6466.35	4733.36	7263.91
Glu	40751.1	41569.6	24692.6	10052	12301.1	10266	8201.32	29996.2	21931.8	18927	35557.7	51289	33887.2	32424.9
Met	293.509	285.037	156.256	58.8439	79.0454	92.8271	137.102	321.161	295.367	209.382	273.654	425.265	248.373	336.488
His	1836.82	1854.21	806.76	315.594	428.217	400.331	480.152	1518.91	1060.26	945.992	1453.73	1890.92	2155.1	1635.82
Phe	606.401	509.473	251.162	111.625	150.166	184.306	262.098	670.75	476.077	422.72	642.661	881.619	825.386	764.271
Arg	1866.1	1579.34	659.5	319.353	425.941	585.968	662.97	1734.96	1534.97	1417.13	1753.9	2547.4	1713.2	2641.1
Tyr	632.254	577.146	298.174	114.989	170.19	192.185	259.46	701.084	466.771	377.038	625.85	830.844	855.337	773.961
Trp	137.454	138.922	64.0838	32.9922	42.1058	40.5406	49.5144	142.275	103.749	93.1175	153.661	194.315	200.369	173.085

## Sheet: S1B-C
(B and C) RT and real-time PCR analysis of Saa3 (B) and Socs3 (C) mRNA abundance in C2C12 myotubes incubated in the absence or presence of rIL-6 (50 ng/ml) for 1 h (n = 8 or 9 independent experiments).
	Gapdh	Socs3	Socs3/Gapdh			Gapdh	Saa3	Saa3/Gapdh
Control 1	0.136167	0.0822775	0.604241		Control 1	0.136167	0.206008	1.51291
Control 2	0.143785	0.0915261	0.636549		Control 2	0.143785	0.0356687	0.24807
Control 3	0.0620854	0.0530763	0.854892		Control 3	0.0620854	0.0466908	0.752041
Control 4	0.276034	0.134719	0.488054		Control 4	0.276034	0.109081	0.395173
Control 5	0.256333	0.125099	0.488034		Control 5	0.256333	0.179765	0.701296
Control 6	0.278053	0.129027	0.464036		Control 6	0.278053	0.320936	1.15422
Control 7	0.32413	0.138236	0.426483		Control 7	0.32413	0.216076	0.666634
Control 8	0.279057	0.122985	0.440717		Control 8	0.279057	0.159867	0.572883
Control 9	0.265471	0.130177	0.490365		Control 9	0.265471	0.121892	0.459154
rIL-6 1	0.0607912	0.097804	1.60885		rIL-6 1	0.0607912	0.0447971	0.736901
rIL-6 2	0.0800362	0.125156	1.56374		rIL-6 2	0.0800362	0.135686	1.69531
rIL-6 3	0.164748	0.270985	1.64485		rIL-6 3	0.164748	0.164209	0.996729
rIL-6 4	0.257514	0.171446	0.665774		rIL-6 4	0.257514	-	-
rIL-6 5	0.26323	0.130144	0.494413		rIL-6 5	0.26323	0.473359	1.79827
rIL-6 6	0.267951	0.133376	0.497762		rIL-6 6	0.267951	0.308773	1.15235
rIL-6 7	0.27149	0.134721	0.49623		rIL-6 7	0.27149	0.344072	1.26735
rIL-6 8	0.25092	0.166584	0.663894		rIL-6 8	0.25092	0.223626	0.891224
rIL-6 9	0.242314	0.129931	0.536208		rIL-6 9	0.242314	0.379873	1.56769

## Sheet: S1D
(D) Amino acid concentrations in iBAT of mice as in (A).
n mol/g tissue weight	Control 1	Control 2	Control 3	Control 4	Control 5	Imm 1	Imm 2	Imm 3	Imm 4	Imm 5	Imm+rIL-6 1	Imm+rIL-6 2	Imm+rIL-6 3	Imm+rIL-6 4	Imm+rIL-6 5
Glucose 6-phosphate	78.4703	79.3918	113.969	84.9447	55.3458	83.5964	45.2332	65.3181	75.2145	92.3153	39.468	31.2404	53.5185	36.616	58.8237
Fructose 6-phosphate	19.4291	19.5803	27.4222	20.9667	16.8814	19.9723	10.9683	13.6926	19.4638	21.1829	13.3861	9.99469	16.0093	12.1111	19.2025
Fructose 1,6-diphosphate	91.7039	106.232	118.13	158.633	126.324	173.134	121.542	44.3029	146.931	182.455	71.5584	136.083	173.679	49.282	117.06
3-Phosphoglyceric acid	10.965	3.9368	4.57279	5.65307	3.29403	3.47365	12.5821	-	6.19168	2.67062	10.3868	14.0127	3.12905	2.20662	3.10935
2-Phosphoglyceric acid	4.66294	1.93219	2.83778	4.07112	3.6892	1.64386	5.81214	-	7.47296	4.39145	5.79925	5.69406	5.86724	6.63644	4.30834
Lactic acid	3037.5	2636.11	3319.94	7039.87	4034.38	3741.05	5869.84	3181.98	6191.82	7869.54	2745.82	3726.36	3720.44	4713.74	4922.4
6-Phosphogluconic acid	3.54253	1.59466	2.8891	1.56928	2.6006	2.52729	1.88516	1.07536	2.43701	2.50911	1.95892	1.57853	2.04102	3.42432	1.30891
Sedoheptulose 7-phosphate	5.71933	7.52813	9.52635	5.07122	8.64392	9.5026	7.51899	13.0514	8.61301	8.08873	6.96895	7.07193	7.01915	14.7118	11.0519
Acetyl CoA_divalent	14.6934	2.57413	19.1127	11.8338	10.1492	25.5894	32.8606	8.63026	24.8516	45.5825	26.1956	34.38	28.4861	14.5176	18.3031
Citric acid	42.3586	135.26	21.1684	121.143	125.038	67.3989	43.8035	64.1392	184.772	96.382	6.8764	82.4601	127.104	43.2479	108.889
Isocitiric acid	6.51236	12.2861	5.90923	13.347	6.39599	4.13376	6.79969	6.59728	18.2663	9.90857	2.09924	3.82374	8.57841	1.47002	7.34102
Malic acid	262.471	696.085	323.816	448.903	403.316	260.444	342.668	367.683	363.309	238.44	138.863	216.645	292.042	159.559	440.171
Glycerol 3-phosphate	25.4076	14.2388	15.1698	12.0917	121.431	65.1023	25.9521	222.305	124.43	29.9844	7.50261	111.308	37.2947	227.76	22.6183
Glucose 1-phosphate	7.1768	7.71528	10.0738	10.3526	6.54903	8.46914	7.54486	5.19394	10.2484	12.2873	4.97111	5.68885	7.79577	4.94909	8.44674

[truncated: 8 more sheets: S1E, S1F-H, S1I, S1J, S1K-M, S1N-P, S2A-E, S2F]
