# Supplementary material for: Brown adipose tissue and skeletal muscle coordinately contribute to thermogenesis in mice
Source: eLife. 2025 Oct 27;13:RP99982. doi: 10.7554/eLife.99982 (PMC12558653; doi:10.7554/eLife.99982)
Supplement: Figure 7—source data 1. [file elife-99982-fig7-data1.xlsx]

## Sheet: Fig.7A
(A) RT and real-time PCR analysis of Il6 expression in iBAT, soleus, liver, eWAT, and spleen of mice subjected (or not) to cold (4°C) exposure for 4 h (control, n = 6–9; cold exposure, n = 5 or 6).
Soleus
	Gapdh	Il6	Il6/Gapdh	Fold Change
Control 1	0.0570302	0.111864	1.96149	1.42743
Control 2	0.0564267	0.0937327	1.66114	1.20885
Control 3	0.0658297	0.100367	1.52464	1.10952
Control 4	0.0680798	0.0829592	1.21856	0.886776
Control 5	0.0942379	0.0498167	0.528627	0.384695
Control 6	0.0911149	0.123042	1.3504	0.982723
Cold exposure 1	0.107671	0.199434	1.85225	1.34793
Cold exposure 2	0.0952325	0.145288	1.52562	1.11023
Cold exposure 3	0.0866447	0.142166	1.6408	1.19405
Cold exposure 4	0.0786787	0.205759	2.61518	1.90313
Cold exposure 5	0.0923563	0.222041	2.40418	1.74958
iBAT
	Gapdh	Il6	Il6/Gapdh	Fold Change
Control 1	0.319233	0.235598	0.738011	0.824827
Control 2	0.482585	0.484194	1.00333	1.12136
Control 3	0.238933	0.346855	1.45168	1.62245
Control 4	0.352927	0.29122	0.825155	0.922222
Control 5	0.289864	0.250515	0.864251	0.965918
Control 6	0.506216	0.22081	0.436197	0.487509
Control 7	0.354222	0.372923	1.0528	1.17664
Control 8	0.492638	0.458771	0.931252	1.0408
Control 9	0.384882	0.288676	0.750038	0.838269
Cold exposure 1	0.835478	0.792162	0.948154	1.05969
Cold exposure 2	0.822969	1.1542	1.40248	1.56747
Cold exposure 3	0.81119	1.22511	1.51026	1.68792
Cold exposure 4	2.195	5.39793	2.45919	2.74848
Cold exposure 5	0.883094	0.93153	1.05485	1.17894
Cold exposure 6	1.02833	1.72917	1.68152	1.87933
Liver
	Gapdh	Il6	Il6/Gapdh	Fold Change
Control 1	0.837047	0.655574	0.783199	0.827294
Control 2	1.01414	0.696369	0.686659	0.725319
Control 3	0.762112	0.751594	0.9862	1.04172
Control 4	0.656572	0.902029	1.37385	1.4512
Control 5	0.636826	0.554706	0.871048	0.92009
Control 6	0.871719	0.853622	0.97924	1.03437
Cold exposure 1	1.55644	0.592198	0.380482	0.401904
Cold exposure 2	1.54744	0.675431	0.436482	0.461057
Cold exposure 3	1.92502	0.546177	0.283725	0.2997
Cold exposure 4	2.06188	0.930419	0.451248	0.476654
Cold exposure 5	1.4792	0.514879	0.348079	0.367677
Spleen
	Gapdh	Il6	Il6/Gapdh	Fold Change
Control 1	0.299239	0.316226	1.05676	1.00352
Control 2	0.299223	0.370903	1.23955	1.1771
Control 3	0.334617	0.270254	0.807654	0.766963
Control 4	0.303404	0.25167	0.829487	0.787696
Control 5	0.235876	0.270076	1.14499	1.08731
Control 6	0.241746	0.299736	1.23988	1.17741
Cold exposure 1	0.271871	0.131218	0.48265	0.458333
Cold exposure 2	0.316194	0.160072	0.506246	0.480741
Cold exposure 3	0.171027	0.116341	0.680247	0.645975
Cold exposure 4	0.261717	0.149067	0.569573	0.540877
Cold exposure 5	0.311911	0.147685	0.473486	0.449631
eWAT
	Gapdh	Il6	Il6/Gapdh	Fold Change
Control 1	0.364659	0.46464	1.27418	1.01496
Control 2	0.309642	0.371681	1.20036	0.956164
Control 3	0.201997	0.236987	1.17322	0.934546
Control 4	0.138132	0.220126	1.5936	1.2694
Control 5	0.34214	0.385301	1.12615	0.897052
Control 6	0.393808	0.458723	1.16484	0.927872
Cold exposure 1	0.108207	0.013232	0.122285	0.0974076
Cold exposure 2	0.149101	0.0165108	0.110736	0.0882081
Cold exposure 3	0.102799	0.00633154	0.0615916	0.0490617
Cold exposure 4	0.0432358	0.00709319	0.164058	0.130683
Cold exposure 5	0.0924552	0.0039994	0.0432578	0.0344576

## Sheet: Fig7.B-D
(B–D) Concentrations of BCAAs (Val, Ile, and Leu, respectively) in soleus of WT and IL-6 KO mice subjected (or not) to cold exposure at 4°C for 4 h (n = 4 per group).
n mole/g tissue	WT								KO
	Control 1	Control 2	Control 3	Control 4	Cold exposure 1	Cold exposure 2	Cold exposure 3	Cold exposure 4	Control 1	Control 2	Control 3	Control 4	Cold exposure 1	Cold exposure 2	Cold exposure 3	Cold exposure 4
Val	70.0691	217.449	222.45	214.67	298.358	359.757	261.951	378.599	298.572	382.654	248.617	216.886	257.068	303.111	342.656	355.511
Ile	139.93	100.044	104.321	97.5052	130.074	148.048	72.8197	168.27	133.355	166.878	97.433	97.518	126.06	129.869	129.851	149.085
Leu	273.265	194.877	197.207	193.842	220.104	266.255	136.505	293.417	257.259	306.739	181.773	180.788	215.5	225.07	234.963	275.048

## Sheet: Fig.7E-F
(E and F) RT and real-time PCR analysis of Il6 expression in iBAT (E) and soleus (F) of control mice and mice subjected to restraint stress for 6 h (n = 4 per group).
iBAT					Soleus
	Gapdh	Il6	Il6/Gapdh			Gapdh	Il6	Il6/Gapdh
Control 1	9.4489	0.156283	0.0165398		C1	0.0488169	0.0530306	1.08632
Control 2	0.0712416	0.11216	1.57436		C2	0.144814	0.0951058	0.656745
Control 3	0.154727	0.046092	0.297893		C3	0.158451	0.103512	0.653274
Control 4	0.15102	0.0530981	0.351596		C4	0.153663	0.0826615	0.537941
Stress 1	0.0850815	0.0663848	0.78025		Stress1	0.0728865	0.092942	1.27516
Stress 2	0.0615224	0.268177	4.35901		Stress2	0.0149653	0.0148634	0.993195
Stress 3	0.0693929	0.0388685	0.560123		Stress3	0.258129	0.256183	0.992461
Stress 4	0.163588	0.118395	0.723738		Stress4	0.133083	0.170555	1.28157

## Sheet: Fig.7G-I
(G–I) Concentrations of BCAAs (Val, Ile, and Leu, respectively) in soleus of WT and IL-6 KO mice subjected (or not) to restraint stress for 6 h (n = 4 per group).
n mol/ g tissue weight	WT									KO
	Control 1	Control 2	Control 3	Control 4	Stress 1	Stress 2	Stress 3	Stress 4	Stress 5	Control 1	Control 2	Control 3	Control 4	Control 5	Control 6	Stress 1	Stress 2	Stress 3	Stress 4	Stress 5	Stress 6
Val	428.469	476.98	335.54	398.685	601.465	478.559	457.532	602.073	442.111	518.365	457.361	444.726	495.138	403.209	314.956	395.251	446.51	515.403	403.539	397.77	391.823
Ile	234.325	255.72	186.402	208.843	326.73	273.512	233.618	341.271	239.067	277.233	241.447	219.84	271.859	212.442	166.52	207.272	229.957	263.712	206.762	202.178	203.984
Leu	436.598	481.105	362.518	400.791	603.796	540.085	419.441	651.021	464.028	477.527	450.45	395.696	465.192	369.952	292.993	404.313	454.765	536.771	400.758	382.907	407.897

## Sheet: S1A-E
(A-E) RT and real-time PCR analysis of Il6, Saa3, Socs3, Fbxo32 and Trim63 mRNA abundance in BBM of mice subjected (or not, control) to bilateral cast immobilization for the indicated times (n = 4 per group).
	Gapdh	Il6	Il6/Gapdh			Gapdh	saa3	saa3/Gapdh			Gapdh	scos3	socs3/Gapdh			Gapdh	Fbxo32	Fbxo32/Gapdh			Gapdh	Trim63	Trim63/Gapdh
Control 1	0.113675	0.0899122	0.790958		Control 1	0.128542	0.0702784	0.546737		Control 1	0.128542	0.104422	0.812357		Control 1	0.128542	0.190591	1.48272		Control 1	0.128542	0.16658	1.29592
Control 2	0.169474	0.181776	1.07258		Control 2	0.169617	0.218657	1.28912		Control 2	0.169617	0.256444	1.51191		Control 2	0.169617	0.206125	1.21524		Control 2	0.169617	0.155874	0.918977
Control 3	0.166889	0.290207	1.73892		Control 3	0.217506	0.230265	1.05866		Control 3	0.217506	0.281849	1.29582		Control 3	0.217506	0.201981	0.928623		Control 3	0.217506	0.223824	1.02904
Control 4	0.160204	0.218567	1.36431		Control 4	0.163227	0.169105	1.03601		Control 4	0.163227	0.115526	0.707764		Control 4	0.163227	0.192726	1.18072		Control 4	0.163227	0.168892	1.0347
Imm (10 h) 1	0.114091	0.145339	1.27388		Imm (10 h) 1	0.107148	0.0491762	0.458958		Imm (10 h) 1	0.107148	0.0979023	0.913715		Imm (10 h) 1	0.107148	0.20177	1.88311		Imm (10 h) 1	0.107148	0.190658	1.7794
Imm (10 h) 2	0.136086	0.347841	2.55604		Imm (10 h) 2	0.180966	0.339391	1.87544		Imm (10 h) 2	0.180966	0.356226	1.96847		Imm (10 h) 2	0.180966	0.358862	1.98303		Imm (10 h) 2	0.180966	0.336462	1.85926
Imm (10 h) 3	0.130764	0.219811	1.68097		Imm (10 h) 3	0.15296	0.206109	1.34746		Imm (10 h) 3	0.15296	0.305094	1.99459		Imm (10 h) 3	0.15296	0.23929	1.56439		Imm (10 h) 3	0.15296	0.202815	1.32593
Imm (10 h) 4	0.181349	0.278142	1.53374		Imm (10 h) 4	0.128356	0.228093	1.77704		Imm (10 h) 4	0.128356	0.326998	2.54759		Imm (10 h) 4	0.128356	0.245315	1.91121		Imm (10 h) 4	0.128356	0.249893	1.94688
Imm (24 h) 1	0.132368	0.306043	2.31207		Imm (24 h) 1	0.159738	0.277674	1.73831		Imm (24 h) 1	0.159738	0.250519	1.56831		Imm (24 h) 1	0.159738	0.425959	2.66661		Imm (24 h) 1	0.159738	0.278663	1.7445
Imm (24 h) 2	0.156003	0.256914	1.64685		Imm (24 h) 2	0.16666	0.269072	1.6145		Imm (24 h) 2	0.16666	0.321249	1.92757		Imm (24 h) 2	0.16666	0.464485	2.78702		Imm (24 h) 2	0.16666	0.469059	2.81446
Imm (24 h) 3	0.150507	0.260305	1.72952		Imm (24 h) 3	0.17494	0.273886	1.5656		Imm (24 h) 3	0.17494	0.350701	2.0047		Imm (24 h) 3	0.17494	0.59114	3.37911		Imm (24 h) 3	0.17494	0.441772	2.52528
Imm (24 h) 4	0.1078	0.236844	2.19707		Imm (24 h) 4	0.148327	0.162723	1.09705		Imm (24 h) 4	0.148327	0.0601462	0.405496		Imm (24 h) 4	0.148327	0.449506	3.0305		Imm (24 h) 4	0.148327	0.404747	2.72874
Imm (Day 3) 1	0.131051	0.324937	2.47947		Imm (Day 3) 1	0.138658	0.226043	1.63022		Imm (Day 3) 1	0.138658	0.240121	1.73175		Imm (Day 3) 1	0.138658	0.164859	1.18896		Imm (Day 3) 1	0.138658	0.163101	1.17628
Imm (Day 3) 2	0.147672	0.277656	1.88022		Imm (Day 3) 2	0.166496	0.215941	1.29697		Imm (Day 3) 2	0.166496	0.30005	1.80215		Imm (Day 3) 2	0.166496	0.235153	1.41237		Imm (Day 3) 2	0.166496	0.295692	1.77598
Imm (Day 3) 3	0.100988	0.327314	3.24112		Imm (Day 3) 3	0.135938	0.376647	2.77073		Imm (Day 3) 3	0.135938	0.382993	2.81741		Imm (Day 3) 3	0.135938	0.165807	1.21973		Imm (Day 3) 3	0.135938	0.117829	0.866784
Imm (Day 3) 4	0.156528	0.333849	2.13284		Imm (Day 3) 4	0.167497	0.235929	1.40856		Imm (Day 3) 4	0.167497	0.423055	2.52574		Imm (Day 3) 4	0.167497	0.579087	3.45729		Imm (Day 3) 4	0.167497	0.56323	3.36262
Imm (Day5) 1	0.128035	0.172278	1.34556		Imm (Day5) 1	0.176864	0.15542	0.878753		Imm (Day5) 1	0.176864	0.214175	1.21096		Imm (Day5) 1	0.176864	0.141925	0.802452		Imm (Day5) 1	0.176864	0.111136	0.628368
Imm (Day5) 2	0.143365	0.325553	2.2708		Imm (Day5) 2	0.150631	0.101526	0.674004		Imm (Day5) 2	0.150631	0.184112	1.22227		Imm (Day5) 2	0.150631	0.176797	1.17371		Imm (Day5) 2	0.150631	0.0961727	0.638466
Imm (Day5) 3	0.109849	0.330482	3.00851		Imm (Day5) 3	0.170853	0.253137	1.4816		Imm (Day5) 3	0.170853	0.330128	1.93223		Imm (Day5) 3	0.170853	0.192431	1.12629		Imm (Day5) 3	0.170853	0.249596	1.46088
Imm (Day5) 4	0.138834	0.325361	2.34353		Imm (Day5) 4	0.157519	0.216356	1.37352		Imm (Day5) 4	0.157519	0.264945	1.68199		Imm (Day5) 4	0.157519	0.11689	0.74207		Imm (Day5) 4	0.157519	0.114415	0.72636

## Sheet: S1F-G
(F-G) BCAA (Val, Ile, and Leu, respectively) concentrations in BBM of mice subjected (or not, control) to bilateral cast immobilization for the indicated times (n = 4 per group).
Val								Ile								Leu
mouse No.	Control	10 h	24 h	Day 3	Day 5	Day 7		mouse No.	Control	10 h	24 h	Day 3	Day 5	Day 7		mouse No.	Control	10 h	24 h	Day 3	Day 5	Day 7
1	195.981	183.438	190.944	227.245	208.384	215.771		1	83.5873	58.7286	65.3328	98.5119	94.9893	84.3755		1	139.098	104.341	108.998	156.455	151.854	147.379
2	174.433	195.813	240.224	207.865	170.685	207.84		2	67.4089	78.0062	98.641	82.6297	62.699	82.3324		2	109.99	130.134	161.309	136.94	132.574	127.503
3	160.544	159.59	209.377	238.135	187.438	197.848		3	64.6413	60.9675	86.0262	105.917	77.5021	84.3977		3	108.285	113.34	144.165	168.36	127.835	133.954
4	90.0278	174.298	214.725	241.341	184.7	198.092		4	36.2486	63.4862	89.4684	105.04	74.2572	81.0819		4	60.7223	112.009	139.481	176.655	118.362	135.087

## Sheet: S1I-J
(I and J) RT and real-time PCR analysis of Saa3 (I) and Socs3 (J) mRNA abundance in soleus of mice subjected (or not) to cold exposure (control, n = 6; cold exposure, n = 5).
Soleus
	Gapdh	Saa3	Saa3/Gapdh			Gapdh	Socs3	Socs3/Gapdh
C1	0.0570302	0.0668718	1.17257		C1	0.0570302	0.12292	2.15536
C2	0.0564267	0.0562713	0.997245		C2	0.0564267	0.0924806	1.63895
C3	0.0658297	0.0786611	1.19492		C3	0.0658297	0.10268	1.55978
C4	0.0680798	0.090331	1.32684		C4	0.0680798	0.111148	1.63262
C5	0.0942379	0.0293218	0.311147		C5	0.0942379	0.0856508	0.908879
C6	0.0911149	0.100513	1.10315		C6	0.0911149	0.106738	1.17146
Cold exposure 1	0.107671	0.287772	2.6727		Cold exposure 1	0.107671	0.223676	2.0774
Cold exposure 2	0.0952325	0.201626	2.1172		Cold exposure 2	0.0952325	0.162793	1.70943
Cold exposure 3	0.0866447	0.112531	1.29876		Cold exposure 3	0.0866447	0.160437	1.85167
Cold exposure 4	0.0786787	0.242402	3.0809		Cold exposure 4	0.0786787	0.210858	2.67999
Cold exposure 5	0.0923563	0.245243	2.6554		Cold exposure 5	0.0923563	0.214588	2.32348

## Sheet: S1K-L
(K and L) RT and real-time PCR analysis of Fbox32 (K) and Trim63 (L) mRNA abundance in soleus of mice subjected (or not) to cold (4°C) exposure for 4 h (control, n = 6; cold exposure, n = 5).
	Gapdh	Fbox32	Fbox32/Gapdh			Gapdh	Trim63	Trim63/Gapdh
Control 1	0.0570302	0.0617217	1.08226		Control 1	0.0570302	0.0904927	1.58675
Control 2	0.0564267	0.0849674	1.5058		Control 2	0.0564267	0.163141	2.8912
Control 3	0.0658297	0.0863069	1.31106		Control 3	0.0658297	0.104062	1.58078
Control 4	0.0680798	0.0498374	0.732045		Control 4	0.0680798	0.0566765	0.832501
Control 5	0.0942379	0.11241	1.19284		Control 5	0.0942379	0.174699	1.8538
Control 6	0.0911149	0.11599	1.27301		Control 6	0.0911149	0.139006	1.52562
Cold exposure 1	0.107671	0.121493	1.12837		Cold exposure 1	0.107671	0.358528	3.32984
Cold exposure 2	0.0952325	0.0862913	0.906112		Cold exposure 2	0.0952325	0.20091	2.10968
Cold exposure 3	0.0866447	0.07379	0.851639		Cold exposure 3	0.0866447	0.181282	2.09225
Cold exposure 4	0.0786787	0.130883	1.66351		Cold exposure 4	0.0786787	0.33683	4.28108
Cold exposure 5	0.0923563	0.080344	0.869935		Cold exposure 5	0.0923563	0.146909	1.59068

## Sheet: S1M-N
(M and N) Weight of individual soleus (M) and gastrocnemius (N) muscles of control mice and mice subjected to. cold exposure at 4°C for 4 h(n = 5 or 6 per group).
(mg)	Gastrocnemius	Soleus	Body weight		(% Body weight)	Gastrocnemius	Soleus
Control1	299	21.6	24.5		Control1	1.22041	0.0881633
Control2	285.5	23	24		Control2	1.18958	0.0958333
Control3	297.1	20.2	24.6		Control3	1.20772	0.0821138
Control4	349.2	23.8	28.69		Control4	1.21715	0.0829557
Control5	338.8	24.4	27.38		Control5	1.2374	0.0891161
Control6	314.6	23.7	26.84		Control6	1.17213	0.088301
Cold exposure 1	280	15	24.5		Cold exposure 1	1.14286	0.0612245
Cold exposure 2	273	16	23.3		Cold exposure 2	1.17167	0.0686695
Cold exposure 3	289	17	24.8		Cold exposure 3	1.16532	0.0685484
Cold exposure 4	254	17	24		Cold exposure 4	1.05833	0.0708333
Cold exposure 5	265	23	25.1		Cold exposure 5	1.05578	0.0916335

## Sheet: S1O
(O) Amino acid concentrations in soleus of WT (+/+) and IL-6 KO (–/–) mice subjected (or not) to cold exposure at 4°C for 4 h. Results are presented as heat maps of the log10 value of fold change relative to WT control mice and are means of four mice in each group.
n mole/g tissue	WT								KO
	Control 1	Control 2	Control 3	Control 4	Cold exposure 1	Cold exposure 2	Cold exposure 3	Cold exposure 4	Control 1	Control 2	Control 3	Control 4	Cold exposure 1	Cold exposure 2	Cold exposure 3	Cold exposure 4
Gly	1726.48	1165.76	1525.02	1305.77	1236.85	1358.13	1087.93	1130.07	1582.68	2003.11	1596.08	1172.9	1278.12	1582.73	1237.64	1255.54
Ala	3885.53	2381	3483.83	2980.34	2597.76	1983.76	1615.3	2317.16	2888.43	3797.64	3329.54	2814.67	2292.13	2795.38	3078.4	1904.06
Ser	574.234	406.642	453.938	402.94	369.991	378.056	283.174	396.317	466.601	597.897	445.374	410.538	379.233	635.871	378.38	436.419
Pro	139.183	131.603	150.904	67.5432	144.963	157.844	118.808	155.527	147.027	171.713	174.928	129.405	159.723	209.537	145.517	181.216
Val	70.0691	217.449	222.45	214.67	298.358	359.757	261.951	378.599	298.572	382.654	248.617	216.886	257.068	303.111	342.656	355.511
Thr	349.818	250.132	302.24	258.569	294.013	292.018	304.902	321.531	325.536	388.885	330.892	296.777	270.185	326.581	396.685	332.188
Cys	6.03614	0.211512	4.04272	4.08826	0.968866	-	-	0.901763	7.09885	0.57347	3.4039	1.31012	1.5143	0.716371	0.642837	0.497656
Ile	139.93	100.044	104.321	97.5052	130.074	148.048	72.8197	168.27	133.355	166.878	97.433	97.518	126.06	129.869	129.851	149.085
Leu	273.265	194.877	197.207	193.842	220.104	266.255	136.505	293.417	257.259	306.739	181.773	180.788	215.5	225.07	234.963	275.048
Asn	151.117	115.817	163.132	109.386	138.598	135.495	109.959	154.616	148.378	190.94	137.453	129.1	143.358	283.133	134.333	149.213
Asp	653.143	493.916	1140.92	542.53	1748.02	2039.82	1162.87	2135.81	1097.57	1662.47	1299.96	504.455	1805.14	1654.41	1108.63	1619.5
Gln	6150.71	4379.01	4735.04	4479.2	2794.79	2462.87	3329.85	3505.46	4792.88	6885.12	3600.2	4690.28	2867.84	4530.35	3354.23	2514.77
Lys	540.473	465.567	662.785	970.669	660.548	678.588	725.473	632.628	630.249	823.632	686.965	649.55	579.308	725.849	948.557	720.948
Glu	5230.68	3979.7	5376.03	4150.89	7131.27	6968.36	4584.53	6746.4	6336.53	9658.23	5915.29	3683.56	6761.68	7319.74	5286.13	7521.3
Met	131.762	108.45	120.058	102.062	47.6518	54.5849	55.1626	59.2431	52.7584	79.0193	76.5598	57.7679	37.7196	48.1943	46.5235	37.636
His	283.45	203.925	246.991	277.289	145.416	166.232	136.519	164.596	249.197	259.824	208.187	211.347	169.802	259.892	187.593	156.26
Phe	127.053	101.761	106.992	105.096	84.4322	85.3625	96.8866	111.397	117.669	134.968	91.2011	84.5537	85.5118	114.404	116.203	88.613
Arg	181.447	177.355	236.699	293.471	217.134	183.178	238.016	196.537	196.919	233.827	206.46	193.896	181.946	222.135	318.857	223.666
Tyr	318.022	239.302	258.345	345.152	244.428	278.93	293.02	293.377	283.763	478.859	310.327	234.098	327.46	223.075	283.381	221.653
Trp	29.8501	26.5821	26.1817	26.2969	25.669	21.3263	16.396	33.591	29.4284	29.9427	27.805	18.1411	21.8067	40.7003	22.8092	23.7168

[truncated: 6 more sheets: S1P, S2A, S2B-C, S2D-F, S2G-H, S2I]
